# Supplementary material
Source: publisher figshare collection journal article supplement (https://gsapubs.figshare.com/articles/dataset/_/19653375)
Supplement: Supplementary file 1 [file 1]

## Sheet: 1) Explanation
ADDITIONAL DETAILS ON DATA AND METHODS: Geomechanical Multisource Data
This Supplemental Material accompanies Dunham, J.B., 2022, Depositional and diagenetic controls
on the mechanical properties of rocks in the Monterey Formation of the Santa Maria Basin, California,
in Aiello, I., Barron, J., and Ravelo, C., eds., Understanding the Monterey Formation and Similar Biosiliceous Units
across Space and Time: Geological Society of America Special Paper 556, https://doi.org/10.1130/2022.2556(01).
Worksheet Tab 1), Explanation: The spreadsheet on Tab 2 presents the references from which raw data were gathered to make statistical graphs. Tab 3 records Uniaxial Compressive Strength and Youngs Modulus data for each rock type. Tab 4 presents Box Plots that record distributions of Uniaxial Compressive Strength and Young's Modulus within common rock types based on data recorded on Tab 3. Tab 5 s…
Worksheet Tab 2) References for each data point presented on on all graphs. Column A "Code" is a short name, while Column B "Reference" lists the complete information for each reference.
Worksheet Tab 3) UCS_YM_Por_Data_by_RockType shows raw data for UCS, Youngs Modulus, and Porosity used to make the plots and graphs in this paper.
Worksheet Tab 4) Box plots of UCS and Young's Modulus based on raw data from Tab 3).
Worksheet Tab 5) Cumulative_NormDist shows calculation of a theoretical normal-distribution line for data sets with the observed mean and standard deviation of each data set.
Worksheet Tab 6) UCS_YM_Chart shows a cross plot of Uniaxial Compressive Stress and Young's Modulus measured for the same individual samples. Note the relatively few data points for Chert relative to the large number of individual UCS and Young's Modulus points for Chert shown by the Box Plots on Tab 4). This is because there were only 7 chert samples were both UCS and YM measurements were report…
Worksheet Tab 7) Chert_Silica_Box_Plots shows details of Biogenic Silica percentage distribtions for relatively pure siliceous rocks from several different locations.
Worksheet Tab 8) Plot of porosity versus UCS
Worksheet Tab 9) UCS Stress-Strain Curves shown in Text Figure 7
Worksheet Tab 10) Bulk density and porosity decrease with increasing burial below seafloor shown in Text Figure 11. Gulf of Mexico data from Pinkston, 2017; Peru data from Garrison reference: Seuss and Huene, 1988.

## Sheet: 2) References
Reference Code	Source: Tabulated Number or Digitized Graph	Complete Reference
Aliyu, 2017	Tabulated Number	Aliyu, M.M., Murphy, W., Lawrence, J.A., and Collier, R., 2017, Engineering geological characterization of flints: Quarterly Journal of Engineering Geology and Hydrogeology, v. 50, no. 2, p. 133-147, doi: 10.1144/qjegh2015-044.
Allison, 1987	Digitized Graph Fig. 7	Allison, R.J., 1987, Non-destructive determination of Young's modulus and its relation with compressive strength, porosity, and density, in Jones, M.E., and Preston, R.M., Deformation of Sediments and Sedimentary Rocks: Geological Society of London Special Publication no. 29, p. 63-69.
Amann 2013	Tabulated Number	Amann, F., Undul, O., and Kaiser, P.K., 2013, Crack initiation and crack propagation in Heterogeneous sulfate-rich clay rocks: Rock Mechanics and Rock Engineering, v. 37, no. 5, p. 1849-1865, doi: 10.1007/s00603-013-0495-3.
Anikoh, 2014	Tabulated Number	Anikoh, G.A., Adesida, P.A., and Afolabi, O.C., 2015, Investigation of physical and mechanical properties of selected rock types in Kogi state using hardness tests: Journal of Mining World Express, v. 4, p. 37-51, doi: 10.14355/mwe.2015.04.004.
Bhat, 2011	Tabulated Number	Bhat, H.S., Sammis, C.G., and Rosakis, A.J., 2011, The micromechanics of Westerley Granite at Large Compressive Loads: Pure Applied Geophysics, v. 168, no. 12, p. 2181-2198, doi: 10.1007/s00024-011-0271-9.
Bowden, 2002	Digitized Graph Fig. 4	Bowden, A.J., Spink, T.W., Mortimore, R.N., 2002, The engineering description of chalk: its strength, hardness and density: Quarterly Journal of Engineering Geology and Hydrogeology, v. 35, p. 355-361, doi: 10.1144/1470-9236/00044.
Brandon, 1974	Tabulated Number	Brandon, J.R., 1974, Rock mechanics properties of typical foundation rock types: Bureau of Reclamation Engineering and Research Center Report REC-ERC-74-10, 99 p., https://www.usbr.gov/tsc/techreferences/rec/REC-ERC-74-10.pdf (accessed January, 2020).
Chang, 2006	Digitized Graph Figs. 1,2,3	Chang, C., Zoback, M.D., and Khaksar, A., 2006, Emperical relations between rock strength and physical properties in sedimentary rocks: Journal of Petroleum Schence and Engineering, v. 51, p. 223-237, doi:10.1016/j.petrol.2006.01.003
D'Andrea, 1965	Tabulated Number	D'Andrea, D.V., Fischer, R.L., and Fogelson, D.E., 1965, Prediction of compressive strength from other rock properties: U.S. Department of the Interior, Bureau of Mines report 6701, 23 p.
Deere, 1966,	Tabulated Number	Deere, D.U., and Miller, R.P., 1966, Engineering Classification and Index Properties for Intact Rock: USAF Technical Report no. AFWL-TR-16-116.
BCGeolSurv 2013	Tabulated Number	Deering, D.R., 2013, Rock sample collection and unconfined compressive test (ASTM D7012), assessment roport on the Raven Property, New Westminster Mining Division: BC Geological Survey Assessment Report 33726, 29 p, https://aris.empr.gov.bc.ca/ArisReports/33726.PDF (accessed January 2020).
Farrokhrouz, 2014	Digitized Graph Fig. 4	Farrokhrouz, M., Asef, M.R., and Kharrat, R., 2014, Emperical estimation of uniaxial compressive strength of shale formations: Geophysics, v. 79, no. 4, p. D227-D233, https://doi.org/10.1190/geo2013-0315.1
Fossum and Fredrich, 2000	Tabulated Number	Fossum, A.F. and Fredrich, J.T., Constitutive Models for the Etchegoin Sands, Belridge Diatomite, and Overburden Formations at the Lost Hills Oil Field, California: Technical Report SAND2000-0827, Sandia National Laboratories, Albuquerque, New Mexico DOI: 10.2172/754313, https://www.osti.gov/servlets/purl/754313
Fredrich, 2000	Tabulated Number	Fredrich, J.T., Deitrick, G.L., Arguello, J.G., DeRouffignac, E.P., 2000, Geomechanical modeling of reservoir compaction, subsurface subsidence, and casing damage at the Belridge Diatomite Field: SPE Reservoir Evaluation and Engineering v. 3, no. 4, p. 348- 359. DOI: 10.2118/65354-PA, https://www.osti.gov/servlets/purl/756095
Han 2009 Table 2	Tabulated Number	Han, G., Dusseault, M.B., Detournay, E., Thomson, B.J., Zacny, K., 2009, Principals of Drilling and Excavation Chapter 2, in Bar-Cohen, Y., and Zacny, K., eds., Drilling in Extreme Environments in Penetration and Sampling on Earth and other planets: Wiley Online Library, https://onlinelibrary.wiley.com/doi/book/10.1002/9783527626625 (accessed January 2020).
Heap, 2014	Tabulated Number	Heap, J.J., Baud, P., Meredith, P.G., Vinciguerra, S. and Reuschle, T., 2014, The permeability and elastic moduli of tuff from Campi Flegrei, Italy: implications for ground deformation modelling: Solid Earth, v. 5, p. 25-44, doi:10.5194/se-5-25-2014.
Horsrud, P., 2001	Digitized Graph Fig. 4, 5, 6	Horsrud, P., 2001, Estimating mechanical properties of shale from empirical correlations: Society of Petroleum Engineers Drilling and Completions v. 16, no. 2, p. 68-73, doi:10.2118/56017-PA
Ishii, 2011	Digitized Graph Fig. 4	Ishii, E., Sanada, H., Iwatsuki, T., Sugita, Y., and Kurikama, H., 2011, Mechanical strength of the transition zone at the boundary between opal-A and opal-CT zones in siliceous rocks: Engineering Geology, v. 122, p. 215-221, doi: 10.1016/j.enggeo.2011.05.007
Jizba, 1991	Tabulated Number	Jizba, D.L, 1991, Mechanical and acoustical properties of sandstones and shales: Stanford University, Ph.D. dissertation, 260 p., https://pangea.stanford.edu/departments/geophysics/dropbox/SRB/public/docs/theses/SRB_045_MAR91_Jizba.pdf (accessed January 2020).
Kahraman 2012	Tabulated Number	Kahraman, S., Fener, M., and Kozman, E., 2012, Predicting the compressive and tensile strength of rocks from indentation hardness index: Journal of The Southern African Institute of Mining and Metallurgy v. 112, p. 331-339. https://www.researchgate.net/publication/260822295_Predicting_the_compressive_and_tensile_strength_of_rocks_from_indentation_hardness_index (accessed January, 2020).
Lake, 1975	Tabulated Number	Lake, L.M., 1975, The engineering properties of chalk with special reference to foundation design and performance: University of Surrey, Dept. of Civil Engineering, Ph.D. dissertation, 374 p., http://epubs.surrey.ac.uk/804394/1/Lake1975.pdf (accessed January, 2020).
Li, 1993	Tabulated Number	Li, Q., 1993, Uniaxial test and mechanical behavior analysis of the tuffaceous beds of Calico Hills, Yucca Mountain, Nevada: University of Reno, M.S. thesis, 72 p., http://dwgateway.library.unr.edu/keck/MackayThesesProject/Mackay_Archive/Mackay_301-400/Mackay392_LiQ.pdf (accessed January, 2020).
Ljunggren, 1985	Tabulated Number	Ljunggren, C., Stephansson, O., Alm, O., Hakami, H., and Mattila, U., 1985, Mechanical properties of granitic rocks from Gidea, Sweden: Swedish Nuclear Fuel and Waste Management Company Technical Report SKB-85-06, 80 p., https://inis.iaea.org/collection/NCLCollectionStore/_Public/17/027/17027647.pdf (accessed January 2020).
Ludovico-Marques, 2012	Tabulated Number	Ludovico-Marques, M., Chastre, C., and Vasconcelos, G., 2012, Modelling the compressive mechanical behaviour of granite and sandstone of historical building stones: Construction and Building Materials, v. 28, p. 372-381, doi: 10.1016/j.conbuildmat.2011.08.083
Madhubabu, 2016	Tabulated Number	Madhubabu, N., Singh, P., Kainthola, A., Mahanta, B., Tripathy, A., Singh, T., 2016, Prediction of compressive strength and elastic modulus of carbonate rocks: Measurement, v. 88, p. 202-213, doi: 10.1016/j.measurement.2016.03.050
Malkowski, 2018	Digitized Graph Fig. 16	Malkowski, P., Ostrowski, L., and Brodny, J., 2018, Analysis of Young's modulus for Carboniferous sedimentary rocks and its relationship with uniaxial compressive strength using different methods of modulus determination: Journal of Sustainable Mining, v. 17, 125-157, doi: 10.1016/j.jsm.2018.07.002
Palmstrom, 2001	Tabulated Number	Palmstrom, A., and Singh, R., 2001, The deformation modulus of rock masses, comparisons between in situ tests and indirect estimates: Tunnelling and Underground Space Technology, v. 1, no. 3, p. 115-131, http://rockmass.net/ap/68_Palmstrom&Singh_on_Deformation_modulus.pdf (accessed January, 2020).
Pinkston, 2017	Digitized Graph Fig. A3	Pore pressure and stress at the Macondo Well, Mississippi Canyon, Gulf of Mexico: M.Sc. Thesis, the University of Texas At Austin, 107 p. https://repositories.lib.utexas.edu/bitstream/handle/2152/64216/PINKSTON-THESIS-2017.pdf?sequence=1&isAllowed=y
Peru, Garriaon	Tabulated Number	Suess, E., von Huene, R, 1988: Proceedings of the Ocean Drilling Program Initial. Reports, v. 112: College Station, TX.
Rahn, 1996	Tabulated Number	Rahn, P.H., 1996, Engineering Geology, an Environmental Approach, second edition: USA, Prentice Hall PTR Press, 657 p.
Risnes, 1999	Tabulated Number	Risnes, R., and Flaageng, O., 1999, Mechanical properties of chalk with emphasis on chalk-fluid interactions and micromechanical aspects: Oil and Gas Science and Technology, v. 54, no. 6, p. 751-758, DOI:10.2516/ogst:1999063
Scholz, 1968	Tabulated Number	Scholz, C.H., 1968, Microfracturing and inelastic deformation of rock in compression: Journal of Geophysical research, v. 73, no. 4, p. 1417-1432, doi: 10.1029/JB073i004p01417.
Stowe, 1969	Tabulated Number	Stowe, R.L., 1969, Strength and deformation properties of granite, basalt, limestone, and tuff at various loading rates: U.S. Army Corps of Engineers Misc. Paper C-69-1, 154 p., https://apps.dtic.mil/dtic/tr/fulltext/u2/684358.pdf (accessed January, 2020).
Vasconcelos, 2007	Digitized Graph Figs. 5, 6, 7	Vasconcelos, G., Lourenco, P., Alves, C., and Pamplona, J., 2007, Prediction of the mechanical properties of granites by ultrasonic pulse velocity and Schmidt Hammer hardness: Proceedings of the Tenth North American Masonry Conference, St. Louis, Mo, USA, p. 980-991, http://citeseerx.ist.psu.edu/viewdoc/download;jsessionid=048780489E20C3885546211FA25900F8?doi=10.1.1.492.6171&rep=rep1&type=pdf (ac…
		Ver Plank, W.E., 1966, Quartzite in California: California Division of Mines and Geology Bulletin 187, 58 p.
Wang, 2009	Tabulated Number	Wang, Q., and Ji, S., 2009, Poisson's ratios of crystalline rocks as a function of hydrostatic confining pressure: Journal of Geophysical Research, v. 114, p. 1-21, doi:10.1029/2008JB006167.
Webb, 2008	Tabulated Number	Webb, J.A., and Domanski, M., 2008, The relationship between lithology, flaking properties and artifact manufacture for Australian Silcretes: Archaeometry, v. 50, p. 555-575, https://www.researchgate.net/publication/229733504_The_relationship_between_lithology_flaking_properties_and_artefact_manufacture_for_Australian_silcretes (accessed January, 2020).
Yamamoto, 2007	Digitized Graph Fig. 3, 4	Yamamoto, T., Tsusaka, K., and Tanimoto, C., 2007, Deformation moduli of soft rocks in Japan through Geological Strength Index (GSI), in Eberhardt, E., Stead, D., and Morrison, T., (eds.), Rock Mechanics: Meeting Society's Challenges and Demands: CRC Press, Taylor and Francis Group, USA, p. 287-295.
Yasar and Erdogan, 2004	Tabulated Number	Yasar, E., and Erdogan, Y., 2004, Estimation of rock physiomechanical properties using hardness methods: Engineering Geology, v. 71, p. 281-288, doi:10.1016/S0013-7952(03)00141-8.
Zhang, 2013	Tabulated Number	Zhang, Y., Guo, C., Yao, X. Qu, Y., and Zhou, N., 2013, Engineering geological characterization of clayey diatomaceous earth deposits encountered in highway projects in the Tengchong region, Yunnan, China: Engineering Geology, v. 167, p. 95-104, doi: 10.1016/j.enggeo.2013.10.009.

## Sheet: 3) UCS_YM_Por_Data_by_RockType
Chert UCS	Chert YM	Chert Porosity	Chert Refs		Silcrete UCS	Silcrete YM	Silcrete Porosity	Silcrete Refs		Quartzite UCS	Quartzite YM	Quartzite Porosity	Quartzite Refs		Basalt UCS Mpa	Basalt YM Gpa	Basalt Porosity	Basalt Refs		Granite UCS	Granite YM	Granite Porosity	Granite Refs		Carbonate UCS	Carbonate YM	Carbonate Porosity	Carbonate Refs		Sandstone UCS	Sandstone YM	Sandstone Porosity	Sandstone UCS-YM-Por Refs		Shale UCS	Shale YM	Shale Porosity	Shale Refs		Chalk UCS	Chalk YM	Chalk Porosity	Chalk Refs		Japan Diatomite UCS	Japan Diatomite YM	Japan Diatomite Porosity	Japan Diatomite Refs
Averages for Multiple Samples					338.34	52.775		Webb, 2008		209	58		Palmstrom, 2001,		58	32.4		Rahn, 1996		107.361	42.045		Vasconcelos, 2007		8.122	3.055		Chang, 2006		8.421	12.883		Chang, 2006		1.095		0.485878	Chang, 2006		0.672	1.06804		Lake, 1975		1.148		0.63404	Ishii, 2011
256.16	83.8	0.0143154	BLSUKn_Aliyu, 2016		350.28	53.323		Webb, 2008		214.9	47.8621	0.0363636	D'Andrea, 1965		61.3793			Brandon, 1974		109.104			Vasconcelos, 2007		10.205	8.182		Chang, 2006		9.137	2.003		Chang, 2006		1.242		0.410647	Chang, 2006		0.768	2.58666		Lake, 1975		1.22		0.64255	Ishii, 2011
307.991	71.5654	0.016724	BLSUKt_Aliyu, 2016		417.59	53.704		Webb, 2008		220.632	38.6106		Deere, 1966, Table 4.2		68.2759			Brandon, 1974		109.2			Kahraman 2012		11.03	5.56		Madhubabu, 2016		9.488	9.203		Chang, 2006		1.275	0.3408	0.71498	Horsrud, 2001		0.7968	4.50579		Lake, 1975		1.675		0.61277	Ishii, 2011
395.76	84.95	0.0116459	TMKT_Aliyu, 2016		496.36	58.049		Webb, 2008		230			Pottsville Sandstone, Scholz, 1968		82.069			Brandon, 1974		109.2		0.011	Ludovico-Marques, 2012		11.38	5.23		Madhubabu, 2016		10.003	5.643		Chang, 2006		1.539	0.1232	0.4449	Horsrud, 2001		0.816	2.1778		Lake, 1975		1.818		0.61206	Ishii, 2011
493.18	74.01	0.008	TSKT_Aliyu, 2016		505.51	53.029		Webb, 2008		253.586			Saragassa Quartzite, VerPlank, 1966		95.8621			Brandon, 1974		111.2		0.0111	Ludovico-Marques, 2012		11.767	2.145		Chang, 2006		11.633	2.923		Chang, 2006		1.722		0.400649	Chang, 2006		1.1052		0.466674	Bowden, 2002		2.105		0.39787	Ishii, 2011
502.88	85.13	0.0147378	SDFr_Aliyu, 2016		512.33	57.878		Webb, 2008		311.5	62.6207	0.0121212	D'Andrea, 1966		111.51		0.014	Yasar, 2014		113.39	42.664		Vasconcelos, 2007		11.871	10.733		Chang, 2006		12.45	1.764		Chang, 2006		1.729		0.350286	Chang, 2006		1.152	2.77022		Lake, 1975		2.464		0.51206	Ishii, 2011
537.23	80.49	0.015759	SESUK_Aliyu, 2016		553	54.375	0.0196667	Webb, 2008		320.1	88.4	0.005	Han 2009 Table 1		120	41		Rahn, 1996		113.971	42.122		Vasconcelos, 2007		12.079	5.227		Chang, 2006		16.346	3.8885		Malkowski, 2018		1.737		0.290051	Chang, 2006		1.2326		0.433635	Bowden, 2002		2.823		0.61844	Ishii, 2011
560.31	85.44	0.0162348	LMFr_Aliyu, 2016		561.83	58.313		Webb, 2008		328.19	96.5264	0.0181818	Deere, 1966, Table 4.2		130.449	23.9937	0.04	Stowe_1969		114.5			Kahraman 2012		14.56	6.78		Madhubabu, 2016		16.566	2.2042		Malkowski, 2018		1.803	0.2572	0.56626	Horsrud, 2001		1.2375		0.448351	Bowden, 2002		2.847		0.65035	Ishii, 2011
436.216	80.7693	0.0139167	<-Means		584.33	57.535		Webb, 2008		340	39	0.0077	Jizba, 1991		142.928	29.3027	0.0524	Stowe_1969		114.552			Vasconcelos, 2007		15.58	6.5		Madhubabu, 2016		17.17	4.125		Chang, 2006		2.064		0.394025	Chang, 2006		1.248	3.15405		Lake, 1975		2.895		0.59858	Ishii, 2011
7	7	7	<-Counts		479.952	55.4423	0.0196667	<-Means		374	70	0.0181818	Han 2009 Table 2		146.513	34.4737	0.045	Stowe_1969		114.77	38.064		Vasconcelos, 2007		16.14	4.493		Chang, 2006		17.6		0.186	Ludovico-Marques, 2012		2.195		0.440888	Hosrund, 2001		1.248			Lake, 1975		3.014		0.62411	Ishii, 2011
Individual UCS - YM Tests					9	9	1	<-Counts		505			Rutland Quartzite, Scholz, 1968		147.341	32.1295	0.04	Stowe_1969		115.133	40.888		Vasconcelos, 2007		18.535	1.285		Chang, 2006		17.9		0.186	Ludovico-Marques, 2012		2.606		0.431515	Chang, 2006		1.344	0.417203		Lake, 1975		3.134		0.60142	Ishii, 2011
230.07	74.167		LMFr, Aliyu, 2017		90.5976	2.42226		<-Std.Dev.		505		0.005	Scholtz, 1968, Rutland Qtzite		147.616	37.0248	0.0347	Stowe_1969		115.424			Vasconcelos, 2007		19.785	3.381		Chang, 2006		18.7	2.64	0.184	Ludovico-Marques, 2012		2.832		0.280303	Chang, 2006		1.3849		0.474176	Bowden, 2002		3.134		0.62199	Ishii, 2011
250.5	67.901		SDFr, Aliyu, 2017		59.1893	1.58251		95% conf. interval for Mean		629	84.8		Minnesota Quartzite, Rahn, 1996		148	33.9		Rahn, 1996		116		0.0111	Ludovico-Marques, 2012		23.013	2.017		Chang, 2006		18.834	4.806		Chang, 2006		3.377		0.2908	Chang, 2006		1.44	1.67715		Lake, 1975		3.206		0.59149	Ishii, 2011
250.76	102.044		SESUK, Aliyu, 2017									0.019	McBride, 2012		149.172	67.3793	0.0105263	D'Andrea, 1966		116.586			Vasconcelos, 2007		25.512	6.588		Chang, 2006		19.95	5.806		Chang, 2006		3.441		0.317668	Chang, 2006		1.592		0.481207	Bowden, 2002		3.684		0.55816	Ishii, 2011
276.87	79.417		SESUK, Aliyu, 2017									0.014	McBride, 2012		150.374	33.0948	0.0535	Stowe_1969		116.9		0.0111	Ludovico-Marques, 2012		26.241	7.523		Chang, 2006		20	13.8	0.186	Jizba, 1991		4.042	0.099		Chang, 2006		1.6144		0.433515	Bowden, 2002		4.091		0.57305	Ishii, 2011
288.77	96.882		LMFr, Aliyu, 2017									0.005	McBride, 2012		153.822	27.579	0.045	Stowe_1969		118.475			Vasconcelos, 2007		28.115	17.929		Chang, 2006		20		0.185	Ludovico-Marques, 2012		4.747	1.056		Chang, 2006		1.6204		0.444552	Bowden, 2002		4.354		0.63404	Ishii, 2011
290.17	93.048		SDFr, Aliyu, 2017							341.608	65.0911	0.0140548	<-Means		156.786	28.7511	0.0359	Stowe_1969		119.056	40.186		Vasconcelos, 2007		28.948	11.033		Chang, 2006		20.514	6.926		Chang, 2006		5.697	30.87		Chang, 2006		1.6496		0.470507	Bowden, 2002		4.45		0.6078	Ishii, 2011
323.82	85.49		SESUK, Aliyu, 2017							13	9	10	<-Counts		157.545	32.4742	0.04	Stowe_1969		120			Kahraman 2012		29.052	8.634		Chang, 2006		24.034	4.6502		Malkowski, 2018		5.702		0.275053	Chang, 2006		1.6517		0.462949	Bowden, 2002		5.144		0.65035	Ishii, 2011
324.36	63.411		SDFr, Aliyu, 2017							131.361	21.4453	0.00969706	<-Std.Dev.		171.679	57.2264	0.037234	Brandon, 1974		120.3			Kahraman 2012		29.11	6.89		Madhubabu, 2016		24.5		0.172	Ludovico-Marques, 2012		5.97		0.314293	Chang, 2006		1.728	0.483955		Lake, 1975		5.335		0.45319	Ishii, 2011
352.09	67.887		LMFr, Aliyu, 2017							71.4073	14.0107	0.00601019	95% conf. interval for Mean		202.9			Kahraman 2012		120.8		0.0043	Ludovico-Marques, 2012		32.255		0.097363	Chang, 2006		25.173	3.368		Wong		6.025	0.8156	0.5501	Horsrud, 2001		1.7619		0.426096	Bowden, 2002		5.694		0.51277	Ishii, 2011
382.1	84.194		SESUK, Aliyu, 2017												234.421	51.0211		Deere, 1966, Table 4.2		121.8			Kahraman 2012		33.08	6.68		Madhubabu, 2016		25.193	5.288		Chang, 2006		6.765	2.211		Chang, 2006		1.7931		0.444626	Bowden, 2002		6.077		0.57305	Ishii, 2011
388.78	80.747		SESUK, Aliyu, 2017												292.062	100.552	0.00507614	D'Andrea, 1965		121.816			Vasconcelos, 2007		33.841		0.164207	Chang, 2006		25.437	2.168		Wong		6.792		0.299796	Chang, 2006		1.805		0.467168	Bowden, 2002		6.292		0.43972	Ishii, 2011
391.09	76.918		SDFr, Aliyu, 2017												306.127	79.2896	0.0319149	Deere, 1966, Table 4.2		122.76	33.837		Vasconcelos, 2007		34.051	37.832		Chang, 2006		26.036	5.4117		Malkowski, 2018		6.877	3.464		Chang, 2006		1.824	0.125161		Lake, 1975		6.388		0.52411	Ishii, 2011
398.55	79.188		LMFr, Aliyu, 2017												368.869	85.4948	0.00531915	Deere, 1966, Table 4.2		124.068	39.648		Vasconcelos, 2007		34.165		0.153097	Chang, 2006		26.064	9.328		Chang, 2006		7.059		0.345534	Chang, 2006		1.824	0.183569		Lake, 1975		6.459		0.43759	Ishii, 2011
399.1	70.548		SDFr, Aliyu, 2017												158.488	45.9492	0.0327047	<-Means		125.3		0.0042	Ludovico-Marques, 2012		34.675	47.961		Chang, 2006		30.202	35.529		Chang, 2006		7.268	3.39		Chang, 2006		1.8649		0.447973	Bowden, 2002		6.507		0.34468	Ishii, 2011
400.62	68.115		LMFr, Aliyu, 2017												24	18	15	<-Counts		125.738			Vasconcelos, 2007		35.2483	23.6552	0.22093	D'Andrea, 1965		30.424	4.3391		Malkowski, 2018		7.882		0.325289	Chang, 2006		1.9134		0.437206	Bowden, 2002		7.249		0.47943	Ishii, 2011
412.88	70.546		LMFr, Aliyu, 2017												76.5081	22.705	0.0161969	<-Std.Dev.		126.863	64.1211	0.00581395	Brandon, 1974		35.925	14.366		Chang, 2006		30.911	4.789		Malkowski, 2018		7.936		0.431012	Chang, 2006		1.92	0.150193		Lake, 1975		7.392		0.48936	Ishii, 2011
415.57	67.337		SESUK, Aliyu, 2017												30.6091	10.489	0.0081966	95% conf. interval for Mean		127.119			Vasconcelos, 2007		36.862	7.193		Chang, 2006		31.991	6.4733		Malkowski, 2018		7.94	21.268		Chang, 2006		1.92	0.467267		Lake, 1975		7.512		0.60426	Ishii, 2011
418.98	87.865		SESUK, Aliyu, 2017																	130.533			Vasconcelos, 2007		38.945	20.049		Chang, 2006		32.241	19.01		Chang, 2006		7.962	10.34		Chang, 2006		1.9537		0.455669	Bowden, 2002		2.567	0.389493	0.59191	Yamamoto, 2007
426.37	88.415		LMFr, Aliyu, 2017																	131.695	52.519		Vasconcelos, 2007		38.946		0.216859	Chang, 2006		32.82	11.03	0.25	Han 2009 Table 1		8.004	1.1236	0.29892	Horsrud, 2001		2.092		0.481293	Bowden, 2002		2.6626	0.28827	0.61863	Yamamoto, 2007
430.74	66.573		SDFr, Aliyu, 2017																	132.09	61.5862	0.012	D'Andrea, 1965		42.316		0.141144	Chang, 2006		33.431	27.21		Chang, 2006		8.093		0.2798	Chang, 2006		2.1215		0.440825	Bowden, 2002		4.8948	0.678578	0.54053	Yamamoto, 2007
444.7	74.806		SDFr, Aliyu, 2017																	132.131	53.515		Vasconcelos, 2007		42.693	27.298		Chang, 2006		33.554	12.37		Chang, 2006		8.221		0.340285	Chang, 2006		2.1336		0.42999	Bowden, 2002		5.0383	0.362827	0.58882	Yamamoto, 2007
446.4	72.432		SDFr, Aliyu, 2017																	133.2			Kahraman 2012		42.798	30.758		Chang, 2006		33.883	8.6653		Malkowski, 2018		8.223	1.0114	0.40785	Horsrud, 2001		2.1426		0.430057	Bowden, 2002		1.09		0.61	Zhang, 2013
448.44	88.666		SESUK, Aliyu, 2017																	133.511			Vasconcelos, 2007		44.36	43.943		Chang, 2006		34.089	10.73		Chang, 2006		8.27	2.83	0.272727	Han 2009 Table 1		2.1863		0.403971	Bowden, 2002		1.36		0.62	Zhang, 2013
478.89	105.33		SDFr, Aliyu, 2017																	133.793	70.3448	0.012	D'Andrea, 1965		46.026	49.525		Chang, 2006		34.698	6.6119		Malkowski, 2018		8.559		0.370527	Chang, 2006		2.2094		0.418755	Bowden, 2002		2.11		0.606	Zhang, 2013
480.45	92.483		LMFr, Aliyu, 2017																	135.4		0.0048	Ludovico-Marques, 2012		46.13	42.048		Chang, 2006		34.699	6.0236		Malkowski, 2018		8.57		0.288922	Chang, 2006		2.2156		0.396547	Bowden, 2002		3.93811	0.429792	0.565005	<-Means
493.39	105.612		SESUK, Aliyu, 2017																	135.9		0.0049	Ludovico-Marques, 2012		46.1948	43.4369		Brandon, 1974		34.701	4.7662		Malkowski, 2018		8.704		0.309042	Hosrund, 2002		2.2852		0.407855	Bowden, 2002		35	4	35	<-Counts
519.29	76.543		LMFr, Aliyu, 2017																	135.931	30.3448	0.047	D'Andrea, 1965		46.442	29.09		Chang, 2006		34.966	8.5269		Malkowski, 2018		8.774		0.296295	Hosrund, 2003		2.2972		0.429996	Bowden, 2002		1.97043	0.1713	0.0773766	<-Std.Dev.
521.49	97.944		SDFr, Aliyu, 2017																	136.2		0.0045	Ludovico-Marques, 2012		46.963	8.328		Chang, 2006		36.513	4.691		Wong		8.896		0.403768	Hosrund, 2004		2.3256		0.425983	Bowden, 2002		0.652792	0.167871	0.0256344	95% conf. interval for Mean
521.57	68.577		SDFr, Aliyu, 2017																	136.447	70.3264	0.0029	Stowe, 1969		48.421	16.107		Chang, 2006		37.025	7.8002		Malkowski, 2018		9	0.68		Farrokhrouz, 2014		2.3869		0.46699	Bowden, 2002
525.51	80.521		SESUK, Aliyu, 2017																	137.1	44	0.0044	Ludovico-Marques, 2012		49.914		0.126018	Chang, 2006		37.082	6.331		Wong		9.047		0.302044	Chang, 2006		2.4115		0.411338	Bowden, 2002
532.53	103.162		SDFr, Aliyu, 2017																	140.92	51.041		Vasconcelos, 2007		50.191	13.101		Chang, 2006		37.3	7.19		Han 2009 Table 2		9.194	0.639		Chang, 2006		2.4144		0.433546	Bowden, 2002
537	88.43		LMFr, Aliyu, 2017																	141.429			Vasconcelos, 2007		50.399	11.686		Chang, 2006		37.396	9.931		Wong		9.5	0.9		Farrokhrouz, 2014		2.477		0.437428	Bowden, 2002
543.89	65.171		SDFr, Aliyu, 2017																	141.937			Vasconcelos, 2007		50.399	25.781		Chang, 2006		37.454	10.3151		Malkowski, 2018		9.5	1.1		Farrokhrouz, 2014		2.5022		0.444786	Bowden, 2002
550.33	71.857		SESUK, Aliyu, 2017																	142.01			Vasconcelos, 2007		50.6	25.7		Han 2009 Table 1		37.786	5.9199		Malkowski, 2018		10.4	1.66		Farrokhrouz, 2014		2.5842		0.411344	Bowden, 2002
557.65	98.766		SESUK, Aliyu, 2017																	142.155			Vasconcelos, 2007		50.607	28.433		Chang, 2006		38.203	7.851		Wong		10.407		0.345407	Chang, 2006		2.5902		0.422582	Bowden, 2002
558.26	101.425		SDFr, Aliyu, 2017																	142.228			Vasconcelos, 2007		51.545	29.115		Chang, 2006		38.9	10.52		Rahn, 1996		10.482		0.299669	Chang, 2006		2.6588		0.437234	Bowden, 2002
559.58	86.835		SDFr, Aliyu, 2017																	143.172			Vasconcelos, 2007		51.7106	27.579	0.296512	Deere, 1966, Table 4.2		39.512	9.7845		Malkowski, 2018		10.76		0.265427	Chang, 2006		2.6608		0.462652	Bowden, 2002
561.61	89.749		SDFr, Aliyu, 2017																	143.68			Vasconcelos, 2007		52.177		0.218162	Chang, 2006		39.905	12.172		Chang, 2006		10.963		0.279048	Chang, 2006		2.685		0.473891	Bowden, 2002
583.19	80.517		SESUK, Aliyu, 2017																	144			BCGeolSurv 2013		52.69	26.942		Chang, 2006		40.1			Yasar, 2014		11	1.9		Farrokhrouz, 2014		2.688	0.909501		Lake, 1975
592.89	102.629		SDFr, Aliyu, 2017																	144			BCGeolSurv 2013		52.9655	30.2069	0.244186	D'Andrea, 1965		40.8621	6.89655	0.284848	D'Andrea, 1966		11.011	1.573		Chang, 2006		2.7154		0.429811	Bowden, 2002
607.65	78.393		SDFr, Aliyu, 2017																	144.77	64.19		Vasconcelos, 2007		53.1	26.96		Rahn, 1996		41.196	6.4738		Malkowski, 2018		11.202	6.828		Chang, 2006		2.7355		0.455765	Bowden, 2002
624.36	133.454		LMFr, Aliyu, 2017																	144.79	55.8474	0.0177515	Brandon, 1974		54.426		0.11304	Chang, 2006		41.409	8.4926		Malkowski, 2018		11.85		0.285546	Chang, 2006		2.7437		0.426334	Bowden, 2002
632.09	65.08		SESUK, Aliyu, 2017																	146.63		0.0125	Anikoh, 2014		54.564	13.201		Chang, 2006		42.423	15.173		Chang, 2006		12	2.15		Farrokhrouz, 2014		2.7911		0.452022	Bowden, 2002
643.46	89.302		SESUK, Aliyu, 2017																	147.022	59.913		Vasconcelos, 2007		54.668	29.114		Chang, 2006		42.654	9.081		Malkowski, 2018		12.118		0.325536	Chang, 2006		2.8314		0.470351	Bowden, 2002
670.15	100.519		SDFr, Aliyu, 2017																	148.62			Vasconcelos, 2007		54.7793	31.8621		D'Andrea, 1965		43.134	13.7531		Malkowski, 2018		12.256		0.315663	Chang, 2006		2.8376		0.448344	Bowden, 2002
672.13	73.283		LMFr, Aliyu, 2017																	148.91		0.0117	Anikoh, 2014		54.915			Chang, 2006		44.783	3.013		Chang, 2006		12.269	1.637	0.31111	Horsrud, 2001		2.9729		0.451828	Bowden, 2002
678.84	98.371		LMFr, Aliyu, 2017																	149.419	63.577		Vasconcelos, 2007		55.293	19.314		Chang, 2006		44.983	8.5966		Malkowski, 2018		12.416		0.145081	Chang, 2006		3.0479		0.411295	Bowden, 2002
678.86	101.372		LMFr, Aliyu, 2017																	150.073	67.364		Vasconcelos, 2007		55.502	31.691		Chang, 2006		45.134	15.7143		Malkowski, 2018		12.612		0.210315	Chang, 2006		3.1125		0.407618	Bowden, 2002
687.77	94.005		LMFr, Aliyu, 2017																	150.145			Vasconcelos, 2007		57.064	76.651		Chang, 2006		45.692	10.774		Chang, 2006		12.655		0.395268	Chang, 2006		3.1204		0.444542	Bowden, 2002
705.77	93.066		SESUK, Aliyu, 2017																	152.324			Vasconcelos, 2007		59.563	55.08		Chang, 2006		45.999	13.734		Jizba, 1991		12.808		0.275048	Chang, 2006		3.168	0.98126		Lake, 1975
707.81	97.273		SESUK, Aliyu, 2017																	152.397	58.682		Vasconcelos, 2007		60.916	86.198		Chang, 2006		46.013	7.7892		Malkowski, 2018		12.841	1.9161	0.14623	Horsrud, 2001		3.168		0.404142	Bowden, 2002
709.66	84.374		LMFr, Aliyu, 2017																	152.615	60.236		Vasconcelos, 2007		62.411		0.012211	Chang, 2006		46.053	16.718		Malkowski, 2018		12.929	2.0175	0.34344	Horsrud, 2001		3.1781		0.433173	Bowden, 2002
766.67	63.945		LMFr, Aliyu, 2017																	152.906			Vasconcelos, 2007		62.582	64.576		Chang, 2006		46.1948	3.17158	0.333333	Brandon, 1974		13.077		0.30729	Hosrund, 2005		3.2346		0.426219	Bowden, 2002
773.05	80.981		LMFr, Aliyu, 2017																	153.684	71.0159		Stowe, 1969		62.999	21.459		Chang, 2006		46.1948	14.479		Deere, 1966, Table 4.2		13.152	1.671		Chang, 2006		3.2485		0.474514	Bowden, 2002
784.9	57.343		SESUK, Aliyu, 2017																	153.9			BCGeolSurv 2013		63.728	63.819		Chang, 2006		46.502	6.4395		Malkowski, 2018		13.352		0.300167	Chang, 2006		3.2682		0.370835	Bowden, 2002
793.71	80.291		LMFr, Aliyu, 2017																	154.442	81.358		Brandon, 1974		63.8	63.8		Rahn, 1996		47.15	7.9507		Malkowski, 2018		13.414		0.340656	Hosrund, 2006		3.2884		0.396321	Bowden, 2002
798.29	80.414		LMFr, Aliyu, 2017																	155.521	57.794		Vasconcelos, 2007		64.652		0.069065	Chang, 2006		47.309	6.854		Chang, 2006		13.5	1.8		Farrokhrouz, 2014		3.3327		0.400336	Bowden, 2002
814.38	83.944		SESUK, Aliyu, 2017																	155.811			Vasconcelos, 2007		66.123	13.022		Chang, 2006		47.467	13.1996		Malkowski, 2018		13.687		0.34603	Chang, 2006		3.3496		0.470438	Bowden, 2002
843.17	75.517		SESUK, Aliyu, 2017																	156.465			Vasconcelos, 2007		66.927		0.00418	Chang, 2006		47.622	17.8947		Malkowski, 2018		13.715		0.141581	Hosrund, 2007		3.363		0.389501	Bowden, 2002
944.98	70.084		SDFr, Aliyu, 2017																	156.901			Vasconcelos, 2007		67.06	90.087		Chang, 2006		47.682	14.0994		Malkowski, 2018		14	1.56		Farrokhrouz, 2014		3.4012		0.448232	Bowden, 2002
534.116	83.7193	0.0139167	<-Means																	158.499			Vasconcelos, 2007		68.31	39.089		Chang, 2006		48.117	13.015		Malkowski, 2018		14.5	1.98		Farrokhrouz, 2014		3.4579		0.440608	Bowden, 2002
60	60	7	<-Counts																	159.1			BCGeolSurv 2013		68.726	43.156		Chang, 2006		48.987	10.7079		Malkowski, 2018		14.861	4.4465		Malkowski, 2018		3.5103		0.448236	Bowden, 2002
168.068	14.2747	0.00309961	<-Std.Dev.																	161.041	57.894		Vasconcelos, 2007		68.83	8.299		Chang, 2006		49.15	9.8658		Malkowski, 2018		15.253	2.383		Chang, 2006		3.6045		0.403757	Bowden, 2002
42.5262	3.61192	0.00229618	95% conf. interval for Mean																	161.332	59.077		Vasconcelos, 2007		69.663	68.541		Chang, 2006		50.278	26.815		Chang, 2006		15.269		0.265674	Chang, 2006		3.6661		0.378475	Bowden, 2002
																				163.366	57.813		Vasconcelos, 2007		70.705	21.307		Chang, 2006		50.505	9.4852		Malkowski, 2018		15.608	3.9572		Malkowski, 2018		3.676		0.440951	Bowden, 2002
																				164.019			Vasconcelos, 2007		71.434	8.803		Chang, 2006		50.719	10.9041		Malkowski, 2018		15.644	1.909		Malkowski, 2018		3.6894		0.392857	Bowden, 2002
																				165.474	53.0895	0.00555556	Deere, 1966, Table 4.2		71.441			Chang, 2006		50.834	6.8089		Malkowski, 2018		16.435		0.235431	Chang, 2006		3.6973		0.429581	Bowden, 2002
																				166.634	60.126		Vasconcelos, 2007		73.681		0.049924	Chang, 2006		50.885	8.7008		Malkowski, 2018		16.854	10.046		Chang, 2006		3.7053		0.433661	Bowden, 2002
																				167.37		0.02	Anikoh, 2014		74	71		Palmstrom, 2001		51.203	12.9114		Malkowski, 2018		16.975		0.285668	Chang, 2006		3.7083		0.422758	Bowden, 2002
																				174.7	63.9		Ljunggren, 1985		74.38		0.03	Anikoh, 2014		51.534	9.2199		Malkowski, 2018		17.171	2.8077		Malkowski, 2018		3.7389		0.410987	Bowden, 2002
																				184.69		0.0133	Anikoh, 2014		74.413			Chang, 2006		52.18	11.5387		Malkowski, 2018		17.5	1.76		Farrokhrouz, 2014		3.7634		0.420888	Bowden, 2002
																				186.345	53.3793	0.005	D'Andrea, 1965		74.422			Chang, 2006		52.237	10.0275		Malkowski, 2018		17.95	3.6154		Malkowski, 2018		3.7645		0.417008	Bowden, 2002
																				187.9			BCGeolSurv 2013		74.557	91.753		Chang, 2006		52.554	14.6649		Malkowski, 2018		18.5	2.45		Farrokhrouz, 2014		3.8468		0.415205	Bowden, 2002
																				192.9	52.6		Ljunggren, 1985		74.766	33.986		Chang, 2006		53.09	8.8		Han 2009 Table 1		18.514	2.039		Chang, 2006		3.8521		0.363432	Bowden, 2002
																				193	19.1	0.0236686	Han 2009 Table 2		74.766	33.279		Chang, 2006		54.053	17.856		Chang, 2006		19.3	1.6		Farrokhrouz, 2014		3.9113		0.444773	Bowden, 2002
																				193	39		Rahn, 1996		75.042		0.109859	Chang, 2006		54.504	14.3882		Malkowski, 2018		19.442	5.6405		Malkowski, 2018		3.9226		0.43688	Bowden, 2002
																				195.862	61.7931	0.005	D'Andrea, 1965		75.182	22.089		Chang, 2006		54.668	13.3153		Malkowski, 2018		19.474	7.2335		Malkowski, 2018		3.9892		0.42618	Bowden, 2002
																				196.5	60.6738	0.0295858	Deere, 1966, Table 4.2		75.39	14.991		Chang, 2006		54.775	7.616		Chang, 2006		19.5	3.25		Farrokhrouz, 2014		4.0207		0.410931	Bowden, 2002
																				197		0.01	Anikoh, 2014		75.495	18.679		Chang, 2006		55.04	6.497		Wong		19.852	2.8869		Malkowski, 2018		4.032	1.46855		Lake, 1975
																				201.3	69.3		Ljunggren, 1985		76.415		0.015194	Chang, 2006		55.05	11.5734		Malkowski, 2018		20	1.9		Farrokhrouz, 2014		4.1175		0.422439	Bowden, 2002
																				205.3	67.7		Ljunggren, 1985		76.432	47.701		Chang, 2006		55.069	9.337		Chang, 2006		20.416		0.103836	Chang, 2006		4.1509		0.400433	Bowden, 2002
																				208.503	75.3793	0.029	D'Andrea, 1965		76.64	77.557		Chang, 2006		55.15	6.7		Han 2009 Table 1		20.528	5.2649		Malkowski, 2018		4.154		0.389129	Bowden, 2002
																				209.386	64.1379	0.029	D'Andrea, 1965		79.076		0.038999	Chang, 2006		55.158	4.82632		Chang, 2006		22.361	4.8663		Malkowski, 2018		4.182		0.451807	Bowden, 2002
																				213.7	65.3		Ljunggren, 1985		79.243	44.846		Chang, 2006		55.351	9.817		Wong		22.383	2.4193	0.16612	Horsrud, 2001		4.2255		0.426256	Bowden, 2002
																				216.655	64.3448	0.005	D'Andrea, 1965		79.5			Kahraman 2012		55.882	34.457		Chang, 2006		22.799		0.165944	Chang, 2006		4.2296		0.411474	Bowden, 2002
																				217.9	66.8		Ljunggren, 1985		80.065		0.033771	Chang, 2006		55.9	11.2		Han 2009 Table 2		23	4.63		Farrokhrouz, 2014		4.2397		0.440571	Bowden, 2002
																				224.49	81.0345	0.005	D'Andrea, 1965		80.076	77.077		Chang, 2006		56.193	11.137		Chang, 2006		23.278		0.16182	Hosrund, 2008		4.2962		0.433416	Bowden, 2002
																				226	70.6		Rahn, 1996		80.389	49.721		Chang, 2006		56.342	16.4647		Malkowski, 2018		23.42	10.955		Chang, 2006		4.3087		0.388734	Bowden, 2002
																				226.15	27.37	0.00591716	Han 2009 Table 1		80.493	67.503		Chang, 2006		56.344	14.8382		Malkowski, 2018		23.5	2.53		Farrokhrouz, 2014		4.32	0.650836		Lake, 1975
																				234.421	71.7053	0.0295858	Deere, 1966, Table 4.2		80.701	21.507		Chang, 2006		57.064	15.177		Chang, 2006		23.921	12.919		Chang, 2006		4.3248		0.363517	Bowden, 2002
																				244.07	44.2	0.00591716	Han 2009 Table 1		81.3517	45.4483		D'Andrea, 1965		57.435	24.417		Chang, 2006		24.5	2.9		Farrokhrouz, 2014		4.3287		0.414822	Bowden, 2002
																				251	54.6	0.0295858	Han 2009 Table 2		82.12			Yasar, 2014		57.807	14.3076		Malkowski, 2018		24.584		0.102959	Chang, 2006		4.3536		0.455893	Bowden, 2002
																				251	25.4	0.0033	Rahn, 1996		82.575	46.892		Chang, 2006		58.464	17.018		Chang, 2006		25.006	7.4033		Malkowski, 2018		4.3773		0.370676	Bowden, 2002
																				281		0.0236686	Westerly Granite, Scholz, 1968		82.888	23.502		Chang, 2006		58.731	12.2081		Malkowski, 2018		25.952	11.909		Malkowski, 2018		4.3792		0.39683	Bowden, 2002
																				154.931	55.5386	0.0130875	<-Means		83.98			Yasar, 2014		59.331	8.9435		Malkowski, 2018		26	3.1		Farrokhrouz, 2014		4.4084		0.422317	Bowden, 2002
																				105	53	36	<-Counts		84.016			Chang, 2006		59.453	5.858		Chang, 2006		26.957	3.8265	0.10146	Horsrud, 2001		4.4195		0.415293	Bowden, 2002
																				37.5428	14.1914	0.0105719	<-Std.Dev.		84.554	39.996		Chang, 2006		59.865	14.0424		Malkowski, 2018		27.11	8.1425		Malkowski, 2018		4.444		0.359708	Bowden, 2002
																				7.18091	3.82062	0.00345341	95% conf. interval for Mean		84.97	83.997		Chang, 2006		60.173	22.058		Chang, 2006		27.3	4.7		Farrokhrouz, 2014		4.4599		0.433289	Bowden, 2002
																									86	38		Palmstrom, 2001		60.408	13.1887		Malkowski, 2018		27.5	3.9		Farrokhrouz, 2014		4.4943		0.407738	Bowden, 2002
																									86.22	30.018		Chang, 2006		61.157	19.0144		Malkowski, 2018		27.581	12.068		Malkowski, 2018		4.5196		0.349343	Bowden, 2002
																									86.663			Chang, 2006		61.215	16.1766		Malkowski, 2018		27.797		0.098958	Hosrund, 2009		4.545		0.356234	Bowden, 2002
																									86.845	44.012		Chang, 2006		61.602	11.5738		Malkowski, 2018		27.995	5.4685		Malkowski, 2018		4.5579		0.44065	Bowden, 2002
																									86.9	43.9		Han 2009 Table 1		61.652	4.819		Chang, 2006		28.597	13.9567		Malkowski, 2018		4.6054		0.400518	Bowden, 2002
																									86.9	43.9	0.203297	Han 2009 Table 1		64.401	22.0139		Malkowski, 2018		29	3		Farrokhrouz, 2014		4.608	0.7009		Lake, 1975
																									87.053	22.92		Chang, 2006		64.425	5.819		Jizba, 1991		29.759	6.0485		Malkowski, 2018		4.6203		0.444933	Bowden, 2002
																									88.094	36.156		Chang, 2006		65.271	7.5		Chang, 2006		30.635	12.7957		Malkowski, 2018		4.6488		0.407877	Bowden, 2002
																									88.199	36.712		Chang, 2006		66.383	8.14		Chang, 2006		31.5	3.72		Farrokhrouz, 2014		4.7206		0.378448	Bowden, 2002
																									88.634			Chang, 2006		66.412	17.1574		Malkowski, 2018		32	2.95		Farrokhrouz, 2014		4.8237		0.400125	Bowden, 2002
																									89.17			Yasar, 2014		66.474	11.7932		Malkowski, 2018		32.5	6.16		Farrokhrouz, 2014		4.8265		0.422533	Bowden, 2002
																									89.448	19.308		Chang, 2006		66.9	6.9		Han 2009 Table 2		32.536	12.0672		Malkowski, 2018		4.9168		0.359526	Bowden, 2002
																									89.448	41.94		Chang, 2006		66.907	12.2085		Malkowski, 2018		32.576	6.4918		Malkowski, 2018		4.9254		0.42655	Bowden, 2002
																									89.76	37.09		Chang, 2006		66.923	6.9		Chang, 2006		33.483	7.494		Chang, 2006		4.984		0.444947	Bowden, 2002
																									89.865	11.099		Chang, 2006		66.973	11.82		Chang, 2006		33.62	14.3086		Malkowski, 2018		4.9941		0.441001	Bowden, 2002
																									90	51		Rahn, 1996		67.543	13.5		Chang, 2006		33.7	3.45		Farrokhrouz, 2014		5.1189		0.319399	Bowden, 2002
																									90	51		Rahn, 1996		68.147	15.6809		Malkowski, 2018		33.789	5.405		Chang, 2006		5.2075		0.360139	Bowden, 2002
																									90.31		0.019857	Chang, 2006		69.818	20.3646		Malkowski, 2018		33.856	38.722		Chang, 2006		5.2158		0.33044	Bowden, 2002
																									90.489	54.19		Chang, 2006		70.594	14.701		Chang, 2006		34	4.62		Farrokhrouz, 2014		5.2177		0.356193	Bowden, 2002
																									90.594	82.43		Chang, 2006		71.128	12.861		Chang, 2006		35.401	12.457		Chang, 2006		5.2994		0.38924	Bowden, 2002
																									90.698	33.402		Chang, 2006		71.71	6	0.16	Han 2009 Table 1		35.896	12.6242		Malkowski, 2018		5.3729		0.419142	Bowden, 2002
																									90.698	51.084		Chang, 2006		72.179	7.662		Wong		35.939		0.018223	Chang, 2006		5.3741		0.414995	Bowden, 2002
																									90.906	23.93		Chang, 2006		72.471	9.142		Chang, 2006		36.04	15.966		Chang, 2006		5.4236		0.400549	Bowden, 2002
																									91.218	30.119		Chang, 2006		72.985	5.422		Wong		36.394	30.983		Chang, 2006		5.4328		0.334729	Bowden, 2002
																									91.648		0.044037	Chang, 2006		73.118	18.262		Chang, 2006		37.762	13.1701		Malkowski, 2018		5.4379		0.381887	Bowden, 2002
																									91.931	39.5172	0.110465	D'Andrea, 1965		73.68	19.182		Chang, 2006		37.98	6.167		Chang, 2006		5.4417		0.433393	Bowden, 2002
																									92.3896	44.1264		Deere, 1966, Table 4.2		73.7738	9.65264	0.121212	Brandon, 1974		38	3.75		Farrokhrouz, 2014		5.4916		0.319279	Bowden, 2002
																									92.3896	44.1264	0.20765	Deere, 1966, Table 4.2		73.781	13.9969		Malkowski, 2018		38	3.95		Farrokhrouz, 2014		5.5015		0.349247	Bowden, 2002
																									95.8	30.699		Chang, 2006		74.263	17.527		Malkowski, 2018		38.241	9.0965		Malkowski, 2018		5.5157		0.363629	Bowden, 2002
																									96.008	46.309		Chang, 2006		74.726	13.542		Chang, 2006		39	3.85		Farrokhrouz, 2014		5.6622		0.359888	Bowden, 2002
																									96.217	32.088		Chang, 2006		74.882	1.942		Chang, 2006		39.494	11.7702		Malkowski, 2018		5.7276		0.418688	Bowden, 2002
																									96.5264	51.0211	0.01	Deere, 1966, Table 4.2		75.372	22.583		Chang, 2006		39.5	4.17		Farrokhrouz, 2014		5.7552		0.319624	Bowden, 2002
																									96.5264	51.0211	0.136612	Deere, 1966, Table 4.2		75.8422	18.9605		Deere, 1966, Table 4.2		39.628	13.3518		Malkowski, 2018		5.76	1.04301		Lake, 1975
																									96.529	50.426		Chang, 2006		76.082	37.823		Chang, 2006		39.629	12.3391		Malkowski, 2018		5.8187		0.35267	Bowden, 2002
																									96.607			Chang, 2006		76.336	8.983		Wong		39.792	19.0865		Malkowski, 2018		5.9285		0.448261	Bowden, 2002
																									97.0621	55.7931	0.0116279	D'Andrea, 1965		76.81	15.7506		Malkowski, 2018		40.5	3.8		Farrokhrouz, 2014		5.9569		0.411405	Bowden, 2002
																									97.154	51.815		Chang, 2006		77.175	9.983		Wong		41.639	5.159		Malkowski, 2018		5.9984		0.392878	Bowden, 2002
																									97.883	53.76		Chang, 2006		77.694	6.743		Wong		42.412	12.3842		Malkowski, 2018		6.1025		0.3783	Bowden, 2002
																									97.883	55.881		Chang, 2006		77.745	11.583		Wong		42.424	7.199		Chang, 2006		6.1391		0.312147	Bowden, 2002
																									98.82	20.721		Chang, 2006		78.6	10.69		Han 2009 Table 1		42.582	11.8152		Malkowski, 2018		6.2509		0.400379	Bowden, 2002
																									98.908		0.016214	Chang, 2006		78.6001	6.89474	0.181818	Brandon, 1974		42.996	5.135		Chang, 2006		6.2925		0.348875	Bowden, 2002
																									99.132	47.369		Chang, 2006		78.601	14.264		Chang, 2006		43.47	6.8314		Malkowski, 2018		6.336	1.41014		Lake, 1975
																									99.9738	57.2264		Deere, 1966, Table 4.2		79.534	50.984		Chang, 2006		43.599	13.9656		Malkowski, 2018		6.445		0.356038	Bowden, 2002
																									101.631	52.749		Chang, 2006		79.966	39.344		Chang, 2006		45	4.28		Farrokhrouz, 2014		6.5066		0.330756	Bowden, 2002
																									102.18		0.022	Anikoh, 2014		81.136	19.024		Chang, 2006		45	6.8		Farrokhrouz, 2014		6.528	1.3267		Lake, 1975
																									102.36	67.247		Chang, 2006		81.437	21.344		Chang, 2006		45.738	12.4405		Malkowski, 2018		6.7479		0.378324	Bowden, 2002
																									102.777	28.323		Chang, 2006		81.63	15.6355		Malkowski, 2018		45.906	14.0335		Malkowski, 2018		6.9602		0.334185	Bowden, 2002
																									104.026	36.709		Chang, 2006		82.008	23.145		Chang, 2006		45.94	14.8072		Malkowski, 2018		6.9916		0.319403	Bowden, 2002
																									105.5	51.71		Han 2009 Table 1		82.379	21.1843		Malkowski, 2018		46	3.6		Farrokhrouz, 2014		7.1076		0.359809	Bowden, 2002
																									105.5	51.71	0.095	Han 2009 Table 1		82.993	11.585		Chang, 2006		46	6.6		Farrokhrouz, 2014		7.3268		0.356206	Bowden, 2002
																									105.683		0.095286	Chang, 2006		83.519	35.665		Chang, 2006		47	4.1		Farrokhrouz, 2014		7.348		0.345303	Bowden, 2002
																									105.692	51.788		Chang, 2006		83.788	20.5383		Malkowski, 2018		47.262	15.888		Malkowski, 2018		7.352		0.363631	Bowden, 2002
																									107	47		Palmstrom, 2001		84.113	13.025		Chang, 2006		47.298	14.3974		Malkowski, 2018		7.3733		0.319752	Bowden, 2002
																									107.046	60.654		Chang, 2006		84.803	26.305		Jizba, 1991		47.8	4.84		Farrokhrouz, 2014		7.5	0.75	0.4	Risnes, 1999
																									107.09		0.054208	Chang, 2006		85	26.3	0.0939	Jizba, 1991		48.054	6.757		Chang, 2006		7.7712		0.327393	Bowden, 2002
																									107.303	53.6552	0.0639535	D'Andrea, 1965		85.738	9.906		Chang, 2006		48.186	8.4805		Malkowski, 2018		7.8692		0.334688	Bowden, 2002
																									109.025	24.129		Chang, 2006		85.968	5.466		Chang, 2006		48.315	15.6488		Malkowski, 2018		7.9885		0.330478	Bowden, 2002
																									109.129	37.744		Chang, 2006		86.081	16.346		Chang, 2006		48.5	4.9		Farrokhrouz, 2014		8.2037		0.308613	Bowden, 2002
																									110	49		Palmstrom, 2001		86.369	17.506		Chang, 2006		48.559	7.371		Chang, 2006		8.3299		0.345274	Bowden, 2002
																									110.17	12.434		Chang, 2006		86.558	15.2781		Malkowski, 2018		50.02	7.2968		Malkowski, 2018		8.3541		0.356178	Bowden, 2002
																									110.274	27.539		Chang, 2006		86.57	10.226		Chang, 2006		50.728	11.4157		Malkowski, 2018		8.4601		0.334509	Bowden, 2002
																									113.086	61.183		Chang, 2006		86.825	8.186		Chang, 2006		51.778	13.8505		Malkowski, 2018		8.5126		0.341802	Bowden, 2002
																									113.117	56.9655	0.0406977	D'Andrea, 1965		86.9	8.27	0.12	Han 2009 Table 1		52.083	14.4876		Malkowski, 2018		8.6704		0.330437	Bowden, 2002
																									113.606	53.883		Chang, 2006		87.909	32.786		Chang, 2006		52.3	2.54		Farrokhrouz, 2014		9.3	1.17	0.4	Risnes, 1999
																									114.023	22.941		Chang, 2006		88.177	18.6928		Malkowski, 2018		52.507	5.823		Chang, 2006		11.5	1.3	0.4	Risnes, 1999
																									114.71	43.0345	0.0872093	D'Andrea, 1965		88.409	27.747		Chang, 2006		52.9	2.96		Farrokhrouz, 2014			1.6104		Lake, 1975
																									115.481	55.752		Chang, 2006		89.45	21.587		Chang, 2006		53.5	5.74		Farrokhrouz, 2014			2.07767		Lake, 1975
																									116.98		0.001084	Chang, 2006		90.32	27.58	0.157576	Han 2009 Table 1		53.809	19.5394		Malkowski, 2018			2.36137		Lake, 1975
																									117.448	41.931	0.104651	D'Andrea, 1965		90.3212	28.9579	0.157576	Brandon, 1974		53.854	7.7399		Malkowski, 2018		4.10259	1.3899	0.405759	<-Means
																									117.876	51.786		Chang, 2006		90.885	26.747		Chang, 2006		53.938	9.68		Chang, 2006		174	27	152	<-Counts
																									118.709	56.737		Chang, 2006		90.98	35.907		Chang, 2006		54	6.2		Farrokhrouz, 2014		2.02259	1.03136	0.0433304	<-Std.Dev.
																									119.646	72.044		Chang, 2006		92.506	23.228		Chang, 2006		54.117	17.3205		Malkowski, 2018		0.300526	0.389023	0.00688842	95% conf. interval for Mean
																									119.757		0.034319	Chang, 2006		93.606	22.708		Chang, 2006		54.5	4.35		Farrokhrouz, 2014
																									119.854	34.458		Chang, 2006		95		0.07	Ludovico-Marques, 2012		54.969	13.2583		Malkowski, 2018
																									119.958	8.972		Chang, 2006		95.499	18.869		Chang, 2006		55.235	8.943		Chang, 2006
																									122.457	73.912		Chang, 2006		95.898	30.669		Chang, 2006		55.4	4.85		Farrokhrouz, 2014
																									122.7		0.029	Anikoh, 2014		96.376	50.189		Chang, 2006		56.192	63.784		Chang, 2006
																									126.821		0.046826	Chang, 2006		96.739	14.0789		Malkowski, 2018		56.226	11.6082		Malkowski, 2018
																									127.039	34.937		Chang, 2006		96.788	9.949		Chang, 2006		57.449	10.4247		Malkowski, 2018
																									127.94		0.025	Anikoh, 2014		97.04	7.589		Chang, 2006		57.477	16.4097		Malkowski, 2018
																									128.705	86.187		Chang, 2006		97.214	22.304		Malkowski, 2018		57.5	5.95		Farrokhrouz, 2014
																									128.8			Kahraman 2012		98.428	34.95		Chang, 2006		57.744	21.5072		Malkowski, 2018
																									129.642	34.431		Chang, 2006		98.865	23.71		Jizba, 1991		58	3.25		Farrokhrouz, 2014
																									129.955	44.737		Chang, 2006		99	23.8	0.1119	Jizba, 1991		58.169	9.902		Chang, 2006
																									130.684	47.616		Chang, 2006		99.205	29.87		Chang, 2006		58.5	7.9		Farrokhrouz, 2014
																									131.725	49.561		Chang, 2006		101.142	3.59		Chang, 2006		58.977	11.13		Chang, 2006
																									133.053		0.139062	Chang, 2006		101.223	20.5162		Malkowski, 2018		59.38	13.022		Chang, 2006
																									133.079	18.972		Chang, 2006		101.8	13.791		Chang, 2006		59.412	16.0339		Malkowski, 2018
																									133.64		0.033	Anikoh, 2014		102.3		0.046	Ludovico-Marques, 2012		60.093	13.9288		Malkowski, 2018
																									133.704	71.031		Chang, 2006		104		0.042	Ludovico-Marques, 2012		60.16	15.2601		Malkowski, 2018
																									134.2			Kahraman 2012		104.145	22.1775		Malkowski, 2018		60.801	19.0034		Malkowski, 2018
																									134.432	63.276		Chang, 2006		105.02	31.232		Chang, 2006		61.145	14.031		Malkowski, 2018
																									134.614	56.4828	0.0639535	D'Andrea, 1965		105.2		0.043	Ludovico-Marques, 2012		61.413	17.6721		Malkowski, 2018
																									136.7			Kahraman 2012		105.3	17	0.067	Ludovico-Marques, 2012		63.2	6.7		Farrokhrouz, 2014
																									136.7			Kahraman 2012		105.339	35.392		Chang, 2006		63.315	23.857		Jizba, 1991
																									138.91	58.4		Chang, 2006		105.442	23.7811		Malkowski, 2018		63.351	14.2127		Malkowski, 2018
																									140.264	61.633		Chang, 2006		106.095	21.7969		Malkowski, 2018		63.4	3.35		Farrokhrouz, 2014
																									141.734		0.092381	Chang, 2006		106.212	12.992		Chang, 2006		63.483	18.2065		Malkowski, 2018
																									141.93	54.005		Chang, 2006		106.278	19.312		Chang, 2006		64	23.8	0.0511	Jizba, 1991
																									142.763	70.777		Chang, 2006		106.847	20.952		Chang, 2006		64		0.0511	Jizba, 1993
																									144.931		0.092473	Chang, 2006		107	21.37		Rahn, 1996		64.434	17.4668		Malkowski, 2018
																									144.95	55.015		Chang, 2006		108.644	19.3168		Malkowski, 2018		64.5	8.9		Farrokhrouz, 2014
																									145.887	38.622		Chang, 2006		109	28		Palmstrom, 2001		66.639	18.1491		Malkowski, 2018
																									146.312		0.008917	Chang, 2006		109.453	21.128		Malkowski, 2018		66.765	13.464		Chang, 2006
																									146.616	68.174		Chang, 2006		111.478	14.673		Chang, 2006		66.858	21.892		Chang, 2006
																									146.655	87.3793	0.00581395	D'Andrea, 1965		111.5			Kahraman 2012		66.948	14.9176		Malkowski, 2018
																									146.72	65.446		Chang, 2006		111.518	16.2715		Malkowski, 2018		67.454	17.728		Malkowski, 2018
																									148.49	70.195		Chang, 2006		112.61	17.234		Chang, 2006		67.761		0.162042	Chang, 2006
																									149.736		0.018065	Chang, 2006		113.074	17.2369	0.0666667	Brandon, 1974		69.297	11.278		Chang, 2006
																									150.172		0.010596	Chang, 2006		113.491	22.314		Chang, 2006		69.49	18.6493		Malkowski, 2018
																									150.989	74.008		Chang, 2006		114.517	14.714		Chang, 2006		69.5	6.65		Farrokhrouz, 2014
																									151.165		0.012276	Chang, 2006		118.924	40.116		Chang, 2006		71.769	36.474		Chang, 2006
																									151.718	66.254		Chang, 2006		119.684	22.8474		Malkowski, 2019		72.5	5.48		Farrokhrouz, 2014
																									152.814	92.1379	0.005	D'Andrea, 1965		120.3			Kahraman 2012		72.785	15.1784		Malkowski, 2018
																									152.927		0.008635	Chang, 2006		120.3		0.042	Ludovico-Marques, 2012		73.27	43.449		Chang, 2006
																									153.255			Chang, 2006		120.607	15.876		Chang, 2006		73.665	17.5108		Malkowski, 2018
																									153.28	81.409	0.004527	Chang, 2006		121.511	49.876		Chang, 2006		75.2	11.1	0.0545455	Han 2009 Table 1
																									153.697	68.097		Chang, 2006		121.977	14.797		Chang, 2006		75.256	11.008		Chang, 2006
																									155.571	29.577		Chang, 2006		124	17.5		Han 2009 Table 2		77.309	12.1972	0.03357	Horsrud, 2001
																									155.883	79.388		Chang, 2006		124.766	17.437		Chang, 2006		77.387	15.921		Jizba, 1991
																									157.133	62.161		Chang, 2006		125	15	0.1386	Jizba, 1991		77.413		0.032069	Hosrund, 2010
																									157.862	46.248		Chang, 2006		125.017	14.918		Jizba, 1991		77.892	16.904		Jizba, 1991
																									158	46.2	0.001284	Han 2009 Table 2		127.858	24.0245		Malkowski, 2020		78	10.3		Farrokhrouz, 2014
																									158	46.2	0.120879	Han 2009 Table 2		128.72	25.799		Chang, 2006		78	12.15		Farrokhrouz, 2014
																									158.252		0.05998	Chang, 2006		129.161	15.039		Chang, 2006		78	14	0.0594	Jizba, 1991
																									158.579	66.879	0.038999	Deere, 1966, Table 4.2		131.059	38.239		Chang, 2006		78	15.8	0.0524	Jizba, 1991
																									158.579	66.879	0.103825	Deere, 1966, Table 4.2		132.492	16.56		Chang, 2006		78		0.0594	Jizba, 1992
																									158.591	65.874		Chang, 2006		133.568	67.08		Chang, 2006		78		0.0524	Jizba, 1995
																									158.903	45.237		Chang, 2006		134.993	18.001		Chang, 2006		79.053	26.6354		Malkowski, 2018
																									163.693	66.681		Chang, 2006		135.087	27.041		Chang, 2006		80.337	46.421		Chang, 2006
																									164.835		0.008911	Chang, 2006		135.7		0.036	Ludovico-Marques, 2012		80.711	30.442		Chang, 2006
																									164.839	52.713		Chang, 2006		136.2	26	0.038	Ludovico-Marques, 2012		81.515		0.010821	Chang, 2006
																									165.278		0.012272	Chang, 2006		138.761	35.082		Chang, 2006		81.918	11.7861		Malkowski, 2018
																									165.672	72.667		Chang, 2006		139.04	62.042		Chang, 2006		82.204	54.668		Chang, 2006
																									171.338		0.006202	Chang, 2006		139.323	36.002		Chang, 2006		82.349	23.1076		Malkowski, 2018
																									171.607	45.437		Chang, 2006		140.518	18.002		Chang, 2006		83.132	13.686		Chang, 2006
																									172.857	61.274		Chang, 2006		140.562	22.202		Chang, 2006		83.158	12.506		Chang, 2006
																									172.961	30.761		Chang, 2006		141.375	20.722		Chang, 2006		83.5	11.2		Farrokhrouz, 2014
																									172.961	27.2		Chang, 2006		144.672	72.363		Chang, 2006		83.529	17.271		Chang, 2006
																									173	27.17	0.034319	Han 2009 Table 1		147	28		Palmstrom, 2001		87.009	12.4225		Malkowski, 2018
																									173	30.7	0.034	Han 2009 Table 1		148.237	25.5106	0.0606061	Brandon, 1974		87.751	16.6892		Malkowski, 2018
																									173.003		0.024033	Chang, 2006		148.95	32.005		Chang, 2006		88.193	15.813		Malkowski, 2018
																									173.009		0.033835	Chang, 2006		150	23.8	0.0715	Jizba, 1991		89.016	22.113		Chang, 2006
																									173.065	52.989		Chang, 2006		150.246	23.725		Jizba, 1991		89.813	34.521		Chang, 2006
																									175			Kahraman 2012		151.928	26.086		Chang, 2006		90.56	25.3933		Malkowski, 2018
																									175.043	69.559		Chang, 2006		152.162	22.046		Chang, 2006		92.926	57.961		Chang, 2006
																									178.896	66.199		Chang, 2006		153.876	27.526		Chang, 2006		92.981	40.013		Chang, 2006
																									179.462	87.1034	0.00540541	D'Andrea, 1965		154.329	44.526		Chang, 2006		94.501	20.6023		Malkowski, 2018
																									179.833	59.909		Chang, 2006		157.88	13.967		Chang, 2006		94.767	38.624		Chang, 2006
																									182.157		0.028791	Chang, 2006		157.906	43.207		Chang, 2006		96.182	40.393		Chang, 2006
																									192.85	63.241		Chang, 2006		159.094	24.488		Chang, 2006		97	9.2		Farrokhrouz, 2014
																									193	65	0.024033	Han 2009 Table 2		159.137	55.328		Chang, 2006		97.809	31.966		Jizba, 1991
																									193.058	65.034		Chang, 2006		163.788	24.369		Jizba, 1991		98	32	0.046	Jizba, 1991
																									195.765	76.577		Chang, 2006		164	25	0.0393	Jizba, 1991		98		0.046	Jizba, 1991
																									195.869	19.871		Chang, 2006		166.219	45.65		Chang, 2006		99.54	21.229		Chang, 2006
																									197	55	0.018326	Han 2009 Table 2		168.6			Kahraman 2012		100.845	31.081		Chang, 2006
																									197.536	54.88		Chang, 2006		168.825	30.571		Chang, 2006		101.262		0.016932	Chang, 2006
																									197.848	55.511		Chang, 2006		176	31	0.0949	Jizba, 1991		106.113	25.43		Chang, 2006
																									197.952	97.289		Chang, 2006		176.287	30.933		Jizba, 1991		107.623	32.506		Chang, 2006
																									199.58		0.032893	Chang, 2006		177	31	0.0532	Jizba, 1991		108	13.2		Farrokhrouz, 2014
																									203.159	74.379		Chang, 2006		77.9607	17.0087	0.124373	<-Means		108.074		0.166141	Chang, 2006
																									204.616	39.092		Chang, 2006		269	255	32	<-Counts		109.462	15.307		Chang, 2006
																									209.406	76.373		Chang, 2006		40.1034	11.5914	0.0773342	<-Std.Dev.		109.553	24.939		Jizba, 1991
																									209.493		0.018326	Chang, 2006		4.7924	1.42271	0.0267944	95% conf. interval for Mean		109.762	18.084		Chang, 2006
																									209.946		0.036624	Chang, 2006							109.87	11.892		Chang, 2006
																									211.593	44.799		Chang, 2006							110	25	0.0338	Jizba, 1991
																									213.78	78.065		Chang, 2006							110		0.0338	Jizba, 1994
																									214.234		0.018325	Chang, 2006							110.111	13.246		Chang, 2006
																									240.247		0.006274	Chang, 2006							110.111	23.0348		Malkowski, 2018
																									245.019	75.155		Chang, 2006							110.145		0.016802	Chang, 2006
																									245.123	63.712		Chang, 2006							110.3	13.44	0.017	Han 2009 Table 1
																									255.106	65.5001		Deere, 1966, Table 4.2							111.89	15.774		Chang, 2006
																									277.508	58.857		Chang, 2006							111.984	22.629		Chang, 2006
																									293.648	77.42		Chang, 2006							112.008	24.665		Chang, 2006
																									105.806	43.5518	0.065473	<-Means							112.131	13.934		Chang, 2006
																									283	216	76	<-Counts							112.331		0.015301	Chang, 2006
																									54.7422	22.9483	0.0681099	<-Std.Dev.							112.79	37.976		Chang, 2006
																									6.3779	3.06035	0.0153127	95% conf. interval for Mean							112.988	30.639		Chang, 2006
																																			113.219		0.018425	Chang, 2006
																																			118.609	74.791		Chang, 2006
																																			121.782	37.977		Chang, 2006
																																			122.01	13.808		Chang, 2006
																																			122.506		0.065782	Chang, 2006
																																			122.634	16.538		Chang, 2006
																																			122.816	26.312		Chang, 2006
																																			125.82	47.887		Chang, 2006
																																			133.829	28.9704		Malkowski, 2018
																																			140.311	25.528		Chang, 2006
																																			141.397	53.096		Chang, 2006
																																			148.812	24.398		Jizba, 1991
																																			149	23.3	0.0557	Jizba, 1991
																																			149		0.0557	Jizba, 1996
																																			149.711	35.16		Chang, 2006
																																			154.877	30.369		Chang, 2006
																																			170.061	23.44		Chang, 2006
																																			184.555		0.017255	Chang, 2006
																																			184.614	39.975		Chang, 2006
																																			51.0757	13.5991	0.232623	<-Means
																																			306	240	87	<-Counts
																																			39.4026	12.3742	0.156222	<-Std.Dev.
																																			4.41481	1.56552	0.032827	95% conf. interval for Mean
[truncated: 38 more columns]

## Sheet: 4) UCS_YM_BoxPlot_by_Rock
Count	i/n+1	Chert UCS	Chert UCS				Chert UCS									Count	i/n+1	Chert YM	Chert YM				Chert YM									Count	i/n+1	Granite UCS	Granite UCS				Granite UCS									Count	i/n+1
1	0.0163934	230.07	Box Spaceing	0.2			Mean	534.116								1	0.0151515	53.029	Box Spaceing	0.2			Mean	81.661								1	0.00943396	107.361	Box Spaceing	0.2			Mean	154.931								1	0.0117647
2	0.0327869	250.5	X left corner	0.5			Standard Deviation	168.068								2	0.030303	57.343	X left corner	0.5			Standard Deviation	15.4851								2	0.0188679	109.104	X left corner	0.5			Standard Deviation	37.5428								2	0.0235294
3	0.0491803	250.76	X left notch	0.75			Sampe Variance	28246.7								3	0.0454545	57.535	X left notch	0.75			Sampe Variance	239.789								3	0.0283019	109.2	X left notch	0.75			Sampe Variance	1409.46								3	0.0352941
4	0.0655738	276.87	X center	1			Standard Error	21.6974								4	0.0606061	57.878	X center	1			Standard Error	1.92069								4	0.0377358	109.2	X center	1			Standard Error	3.6638								4	0.0470588
5	0.0819672	288.77	X right notch	1.25			Median	529.02								5	0.0757576	58.049	X right notch	1.25			Median	80.517								5	0.0471698	111.2	X right notch	1.25			Median	144.79								5	0.0588235
6	0.0983607	290.17	X right corner	1.5			Mode	#N/A								6	0.0909091	58.313	X right corner	1.5			Mode	#N/A								6	0.0566038	113.39	X right corner	1.5			Mode	109.2								6	0.0705882
7	0.114754	323.82	Q3	671.635			Skewness	0.228987								7	0.106061	63.411	Q3	93.057			Skewness	0.474776								7	0.0660377	113.971	Q3	167.002			Skewness	1.12241								7	0.0823529
8	0.131148	324.36	Median	529.02			Kurtosis	-0.572424								8	0.121212	63.945	Median	80.517			Kurtosis	0.506362								8	0.0754717	114.5	Median	144.79			Kurtosis	0.778216								8	0.0941176
9	0.147541	352.09	Q1	403.685			Range	714.91								9	0.136364	65.08	Q1	69.3305			Range	80.425								9	0.0849057	114.552	Q1	126.301			Range	173.639								9	0.105882
10	0.163934	382.1	Inter Quartile Range	267.95			Minimum	230.07								10	0.151515	65.171	Inter Quartile Range	23.7265			Minimum	53.029								10	0.0943396	114.77	Inter Quartile Range	40.7013			Minimum	107.361								10	0.117647
11	0.180328	388.78	Upper Adjacent Value	1073.56	944.98		Maximum	944.98								11	0.166667	66.573	Upper Adjacent Value	128.647	128.647	add out	Maximum	133.454								11	0.103774	115.133	Upper Adjacent Value	228.054	228.054	add out	Maximum	281								11	0.129412
12	0.196721	391.09	Lower Adjacent Value	1.76	230.07		Coefficient of Variation	0.314665								12	0.181818	67.337	Lower Adjacent Value	33.7407	53.029		Coefficient of Variation	0.189627								12	0.113208	115.424	Lower Adjacent Value	65.2486	107.361		Coefficient of Variation	0.242318								12	0.141176
13	0.213115	398.55	Notch upper Y	583.33			Sum	32047								13	0.19697	67.887	Notch upper Y	85.1374			Sum	5307.96								13	0.122642	116	Notch upper Y	151.026			Sum	16267.8								13	0.152941
14	0.229508	399.1	Notch lower Y	474.71			Count	60								14	0.212121	67.901	Notch lower Y	75.8966			Count	65								14	0.132075	116.586	Notch lower Y	138.554			Count	105								14	0.164706
15	0.245902	400.62	Number of Obs	60												15	0.227273	68.115	Number of Obs	65												15	0.141509	116.9	Number of Obs	105												15	0.176471
16	0.262295	412.88	Max Y	944.98												16	0.242424	68.577	Max Y	133.454												16	0.150943	118.475	Max Y	281												16	0.188235
17	0.278689	415.57	Min Y	230.07			555.878									17	0.257576	70.084	Min Y	53.029			84.916									17	0.160377	119.056	Min Y	107.361			154.701									17	0.2
18	0.295082	418.98	Mean	534.116												18	0.272727	70.546	Mean	81.661												18	0.169811	120	Mean	154.931												18	0.211765
19	0.311475	426.37	St Dev	168.068												19	0.287879	70.548	St Dev	15.4851												19	0.179245	120.3	St Dev	37.5428												19	0.223529
20	0.327869	430.74														20	0.30303	71.857														20	0.188679	120.8														20	0.235294
21	0.344262	444.7	Chert UCS													21	0.318182	72.432	Chert YM													21	0.198113	121.8	Granite UCS					0	0							21	0.247059
22	0.360656	446.4	X	Y												22	0.333333	73.283	X	Y												22	0.207547	121.816	X	Y				0.25	0							22	0.258824
23	0.377049	448.44	0.25	671.635	Q3											23	0.348485	74.167	0.25	93.057	Q3			0	0							23	0.216981	122.76	0.25	167.002	Q3			0.5	0							23	0.270588
24	0.393443	478.89	0.25	583.33	Nup											24	0.363636	74.806	0.25	85.1374	Nup			0.25	0							24	0.226415	124.068	0.25	151.026	Nup			0.75	0							24	0.282353
25	0.409836	480.45	0.25	529.02	Med			0	0							25	0.378788	75.517	0.25	80.517	Med			0.5	0							25	0.235849	125.3	0.25	144.79	Med			1	0							25	0.294118
26	0.42623	493.39	0.75	529.02	Med			0.25	0							26	0.393939	76.543	0.75	80.517	Med			0.75	0							26	0.245283	125.738	0.75	144.79	Med											26	0.305882
27	0.442623	519.29	0.75	583.33	Nup			0.5	0		UCS Mean:	534.116				27	0.409091	76.918	0.75	85.1374	Nup			1	0							27	0.254717	126.863	0.75	151.026	Nup											27	0.317647
28	0.459016	521.49	0.75	671.635	Q3			0.75	0		Std.Dev:	168.068				28	0.424242	78.393	0.75	93.057	Q3											28	0.264151	127.119	0.75	167.002	Q3											28	0.329412
29	0.47541	521.57	0.25	671.635	Q3			1	0		95% +/-	42.5262				29	0.439394	79.188	0.25	93.057	Q3											29	0.273585	130.533	0.25	167.002	Q3											29	0.341176
30	0.491803	525.51									Count:	60				30	0.454545	79.417														30	0.283019	131.695														30	0.352941
31	0.508197	532.53	0.25	529.02	Med						Young's M:	81.661				31	0.469697	80.291	0.25	80.517	Med											31	0.292453	132.09	0.25	144.79	Med											31	0.364706
32	0.52459	537	0.75	529.02	Med											32	0.484848	80.414	0.75	80.517	Med											32	0.301887	132.131	0.75	144.79	Med				70.3264							32	0.376471
33	0.540984	543.89	0.75	474.71	Nlow											33	0.5	80.517	0.75	75.8966	Nlow											33	0.311321	133.2	0.75	138.554	Nlow				79.979							33	0.388235
34	0.557377	550.33	0.75	403.685	Q1											34	0.515152	80.521	0.75	69.3305	Q1											34	0.320755	133.511	0.75	126.301	Q1				71.0159							34	0.4
35	0.57377	557.65	0.25	403.685	Q1											35	0.530303	80.747	0.25	69.3305	Q1											35	0.330189	133.793	0.25	126.301	Q1											35	0.411765
36	0.590164	558.26	0.25	474.71	Nlow											36	0.545455	80.981	0.25	75.8966	Nlow											36	0.339623	135.4	0.25	138.554	Nlow											36	0.423529
37	0.606557	559.58	0.25	529.02	Med											37	0.560606	83.944	0.25	80.517	Med											37	0.349057	135.9	0.25	144.79	Med											37	0.435294
38	0.622951	561.61														38	0.575758	84.194														38	0.358491	135.931														38	0.447059
39	0.639344	583.19	0.5	671.635	Q3											39	0.590909	84.374	0.5	93.057	Q3											39	0.367925	136.2	0.5	167.002	Q3											39	0.458824
40	0.655738	592.89	0.5	944.98	UpAdj											40	0.606061	85.49	0.5	133.454	UpAdj											40	0.377358	136.447	0.5	228.054	UpAdj											40	0.470588
41	0.672131	607.65														41	0.621212	86.835														41	0.386792	137.1														41	0.482353
42	0.688525	624.36	0.5	403.685	Q1											42	0.636364	87.865	0.5	69.3305	Q1											42	0.396226	140.92	0.5	126.301	Q1											42	0.494118
43	0.704918	632.09	0.5	230.07	LowAdj											43	0.651515	88.415	0.5	53.029	LowAdj											43	0.40566	141.429	0.5	107.361	LowAdj											43	0.505882
44	0.721311	643.46														44	0.666667	88.43														44	0.415094	141.937														44	0.517647
45	0.737705	670.15			Outlier 1											45	0.681818	88.666			Outlier 1											45	0.424528	142.01			Outlier 1											45	0.529412
46	0.754098	672.13			Outlier 2											46	0.69697	89.302			Outlier 2											46	0.433962	142.155			Outlier 2											46	0.541176
47	0.770492	678.84														47	0.712121	89.749														47	0.443396	142.228														47	0.552941
48	0.786885	678.86	0.5	534.116	Mean											48	0.727273	92.483	0.5	81.661	Mean											48	0.45283	143.172	0.5	154.931	Mean											48	0.564706
49	0.803279	687.77	0.5	42.5262	Mean 95% CI											49	0.742424	93.048	0.5	3.76449	Mean 95% CI											49	0.462264	143.68	0.5	7.18091	Mean 95% CI											49	0.576471
50	0.819672	705.77														50	0.757576	93.066														50	0.471698	144														50	0.588235
51	0.836066	707.81														51	0.772727	94.005														51	0.481132	144														51	0.6
52	0.852459	709.66														52	0.787879	96.882														52	0.490566	144.77														52	0.611765
53	0.868852	766.67														53	0.80303	97.273														53	0.5	144.79														53	0.623529
54	0.885246	773.05														54	0.818182	97.944														54	0.509434	146.63														54	0.635294
55	0.901639	784.9														55	0.833333	98.371														55	0.518868	147.022														55	0.647059
56	0.918033	793.71														56	0.848485	98.766														56	0.528302	148.62														56	0.658824
57	0.934426	798.29														57	0.863636	100.519														57	0.537736	148.91														57	0.670588
58	0.95082	814.38														58	0.878788	101.372														58	0.54717	149.419														58	0.682353
59	0.967213	843.17														59	0.893939	101.425														59	0.556604	150.073														59	0.694118
60	0.983607	944.98														60	0.909091	102.044														60	0.566038	150.145														60	0.705882
																61	0.924242	102.629														61	0.575472	152.324														61	0.717647
																62	0.939394	103.162														62	0.584906	152.397														62	0.729412
																63	0.954545	105.33														63	0.59434	152.615														63	0.741176
																64	0.969697	105.612														64	0.603774	152.906														64	0.752941
																65	0.984848	133.454														65	0.613208	153.684														65	0.764706
																																66	0.622642	153.9														66	0.776471
																																67	0.632075	154.442														67	0.788235
																																68	0.641509	155.521														68	0.8
																																69	0.650943	155.811														69	0.811765
																																70	0.660377	156.465														70	0.823529
																																71	0.669811	156.901														71	0.835294
																																72	0.679245	158.499														72	0.847059
																																73	0.688679	159.1														73	0.858824
																																74	0.698113	161.041														74	0.870588
																																75	0.707547	161.332														75	0.882353
																																76	0.716981	163.366														76	0.894118
																																77	0.726415	164.019														77	0.905882
																																78	0.735849	165.474														78	0.917647
																																79	0.745283	166.634														79	0.929412
																																80	0.754717	167.37														80	0.941176
																																81	0.764151	174.7														81	0.952941
																																82	0.773585	184.69														82	0.964706
																																83	0.783019	186.345														83	0.976471
																																84	0.792453	187.9														84	0.988235
																																85	0.801887	192.9
																																86	0.811321	193
																																87	0.820755	193
																																88	0.830189	195.862
																																89	0.839623	196.5
																																90	0.849057	197
																																91	0.858491	201.3
																																92	0.867925	205.3
																																93	0.877358	208.503
																																94	0.886792	209.386
																																95	0.896226	213.7
																																96	0.90566	216.655
																																97	0.915094	217.9
																																98	0.924528	224.49
																																99	0.933962	226
																																100	0.943396	226.15
																																101	0.95283	234.421
																																102	0.962264	244.07
																																103	0.971698	251
																																104	0.981132	251
																																105	0.990566	281
[truncated: 157 more columns]

## Sheet: 5) Cumulative_NormDist
Count	i/n+1	Silcrete UCS	Normal Distribution for a Mean of d3 and SD of e3											Count	i/n+1	Quartz Chert UCS	Normal Distribution for a Mean of d3 and SD of e3											Count	i/n+1	Chert YM	Normal Distribution for a Mean of d3 and SD of e3					Count	i/n+1	Granite UCS	Normal Distribution for a Mean of d3 and SD of e3					Count	i/n+1	Granite YM	Normal Distribution for a Mean of d3 and SD of e3
1	0.1	338.34	Mean	StDEV	NormCumDist	Theory Length								1	0.0163934	230.07	Mean	StDEV	NormCumDist	Theory Length								1	0.00850441	53.029	Mean	StDEV	NormCumDist	Theory Length		1	0.00943396	107.361	Mean	StDEV	NormCumDist	Theory Length		1	0.0117647	10.073	Mean	StDEV	NormCumDist
2	0.2	350.28	479.952	90.5976	0.000135288	150								2	0.0327869	250.5	533.959	161.66	0.00877194	150								2	0.0170088	57.343	81.661	15.4851	0.020447	50		2	0.0188679	109.104	154.931	37.5428	1.83923e-05	0		2	0.0235294	10.774	42.3948	22.443	0.0294456
3	0.3	417.59			0.000141208	151								3	0.0491803	250.76			0.00892003	151								3	0.0255132	57.535			0.0238503	51		3	0.0283019	109.2			2.06429e-05	1		3	0.0352941	10.937			0.032559
4	0.4	496.36			0.000147371	152								4	0.0655738	276.87			0.00907032	152								4	0.0340177	57.878	Min	Max	0.0277177	52		4	0.0377358	109.2	Min	Max	2.31532e-05	2		4	0.0470588	11.256	Min	Max	0.035939
5	0.5	505.51			0.000153784	153								5	0.0819672	288.77			0.00922281	153								5	0.0425221	58.049	53.029	133.454	0.0320941	53		5	0.0471698	111.2	107.361	281	2.59512e-05	3		5	0.0588235	11.391	10.073	81.358	0.0396013
6	0.6	512.33			0.000160458	154								6	0.0983607	290.17			0.00937754	154								6	0.0510265	58.313			0.037026	54		6	0.0566038	113.39			2.90676e-05	4		6	0.0705882	11.471			0.0435614
7	0.7	553			0.000167403	155								7	0.114754	323.82			0.00953455	155								7	0.0595309	63.411		Count	0.0425607	55		7	0.0660377	113.971		Count	3.25363e-05	5		7	0.0823529	11.744		Count	0.0478351
8	0.8	561.83			0.000174628	156								8	0.131148	324.36			0.00969384	156								8	0.0680353	63.945		65	0.048746	56		8	0.0754717	114.5		105	3.63942e-05	6		8	0.0941176	12.144		84	0.0524381
9	0.9	584.33			0.000182143	157								9	0.147541	352.09			0.00985545	157								9	0.0765397	65.08			0.0556297	57		9	0.0849057	114.552			4.06821e-05	7		9	0.105882	12.466			0.057386
					0.000189961	158								10	0.163934	382.1			0.0100194	158								10	0.0850441	65.171			0.0632588	58		10	0.0943396	114.77			4.54444e-05	8		10	0.117647	12.602			0.062694
					0.000198091	159								11	0.180328	388.78			0.0101858	159								11	0.0935486	66.573			0.0716788	59		11	0.103774	115.133			5.073e-05	9		11	0.129412	12.682			0.0683771
					0.000206545	160								12	0.196721	391.09			0.0103545	160								12	0.102053	67.337			0.080933	60		12	0.113208	115.424			5.65922e-05	10		12	0.141176	14.053			0.0744497
					0.000215336	161								13	0.213115	398.55			0.0105257	161								13	0.110557	67.887			0.0910617	61		13	0.122642	116			6.30892e-05	11		13	0.152941	14.053			0.0809256
					0.000224475	162								14	0.229508	399.1			0.0106993	162								14	0.119062	67.901			0.102102	62		14	0.132075	116.586			7.02846e-05	12		14	0.164706	14.19			0.0878179
					0.000233974	163								15	0.245902	400.62			0.0108754	163								15	0.127566	68.115			0.114084	63		15	0.141509	116.9			7.8248e-05	13		15	0.176471	15.264			0.0951389
					0.000243848	164								16	0.262295	412.88			0.0110541	164								16	0.136071	68.577			0.127037	64		16	0.150943	118.475			8.7055e-05	14		16	0.188235	15.912			0.1029
					0.000254109	165								17	0.278689	415.57			0.0112353	165								17	0.144575	70.084			0.140979	65		17	0.160377	119.056			9.67881e-05	15		17	0.2	15.912			0.111111
					0.000264772	166								18	0.295082	418.98			0.011419	166								18	0.153079	70.546			0.155923	66		18	0.169811	120			0.000107537	16		18	0.211765	16.097			0.11978
					0.00027585	167								19	0.311475	426.37			0.0116054	167								19	0.161584	70.548			0.171876	67		19	0.179245	120.3			0.000119399	17		19	0.223529	17.716			0.128916
					0.000287359	168								20	0.327869	430.74			0.0117944	168								20	0.170088	71.857			0.188835	68		20	0.188679	120.8			0.000132481	18		20	0.235294	17.772			0.138525
					0.000299313	169								21	0.344262	444.7			0.0119861	169								21	0.178593	72.432			0.206787	69		21	0.198113	121.8			0.000146898	19		21	0.247059	18.229			0.14861
					0.00031173	170								22	0.360656	446.4			0.0121804	170								22	0.187097	73.283			0.225712	70		22	0.207547	121.816			0.000162774	20		22	0.258824	18.708			0.159175
					0.000324624	171								23	0.377049	448.44			0.0123775	171								23	0.195602	74.167			0.24558	71		23	0.216981	122.76			0.000180244	21		23	0.270588	18.928			0.170219
					0.000338012	172								24	0.393443	478.89			0.0125774	172								24	0.204106	74.806			0.266351	72		24	0.226415	124.068			0.000199457	22		24	0.282353	19.1			0.181743
					0.000351913	173								25	0.409836	480.45			0.01278	173								25	0.21261	75.517			0.287976	73		25	0.235849	125.3			0.000220569	23		25	0.294118	19.276			0.193743
					0.000366343	174								26	0.42623	493.39			0.0129855	174								26	0.221115	76.543			0.310395	74		26	0.245283	125.738			0.000243753	24		26	0.305882	20.272			0.206215
					0.000381321	175								27	0.442623	496.36			0.0131938	175								27	0.229619	76.918			0.333542	75		27	0.254717	126.863			0.000269194	25		27	0.317647	25.4			0.219149
					0.000396867	176								28	0.459016	505.51			0.0134049	176								28	0.238124	78.393			0.357341	76		28	0.264151	127.119			0.000297091	26		28	0.329412	27.37			0.232539
					0.000412998	177								29	0.47541	512.33			0.013619	177								29	0.246628	79.188			0.381709	77		29	0.273585	130.533			0.00032766	27		29	0.341176	29.284			0.246371
					0.000429736	178								30	0.491803	519.29			0.0138361	178								30	0.255132	79.417			0.406554	78		30	0.283019	131.695			0.000361134	28		30	0.352941	30.3448			0.260632
					0.000447102	179								31	0.508197	521.49			0.0140561	179								31	0.263637	80.291			0.431782	79		31	0.292453	132.09			0.000397762	29		31	0.364706	32.218			0.275307
					0.000465116	180								32	0.52459	521.57			0.0142791	180								32	0.272141	80.414			0.45729	80		32	0.301887	132.131			0.000437813	30		32	0.376471	33.0948			0.290378
					0.0004838	181								33	0.540984	525.51			0.0145052	181								33	0.280646	80.517			0.482977	81		33	0.311321	133.2			0.000481576	31		33	0.388235	33.837			0.305823
					0.000503177	182								34	0.557377	532.53			0.0147343	182								34	0.28915	80.521			0.508734	82		34	0.320755	133.511			0.000529361	32		34	0.4	34.422			0.321622
					0.000523271	183								35	0.57377	537			0.0149666	183								35	0.297654	80.747			0.534454	83		35	0.330189	133.793			0.0005815	33		35	0.411765	35.746			0.337751
					0.000544105	184								36	0.590164	543.89			0.015202	184								36	0.306159	80.981			0.560032	84		36	0.339623	135.4			0.000638351	34		36	0.423529	36.043			0.354183
					0.000565704	185								37	0.606557	550.33			0.0154405	185								37	0.314663	83.944			0.585361	85		37	0.349057	135.9			0.000700295	35		37	0.435294	38.064			0.370891
					0.000588093	186								38	0.622951	557.65			0.0156823	186								38	0.323168	84.194			0.61034	86		38	0.358491	135.931			0.000767739	36		38	0.447059	39			0.387846
					0.000611299	187								39	0.639344	558.26			0.0159273	187								39	0.331672	84.374			0.634872	87		39	0.367925	136.2			0.000841122	37		39	0.458824	39.648			0.405018
					0.000635348	188								40	0.655738	559.58			0.0161756	188								40	0.340177	85.49			0.658863	88		40	0.377358	136.447			0.000920908	38		40	0.470588	40.186			0.422374
					0.000660267	189								41	0.672131	561.61			0.0164272	189								41	0.348681	86.835			0.682229	89		41	0.386792	137.1			0.0010076	39		41	0.482353	40.888			0.439883
					0.000686086	190								42	0.688525	561.83			0.0166821	190								42	0.357185	87.865			0.70489	90		42	0.396226	140.92			0.00110171	40		42	0.494118	42.045			0.45751
					0.000712833	191								43	0.704918	583.19			0.0169404	191								43	0.36569	88.415			0.726778	91		43	0.40566	141.429			0.00120383	41		43	0.505882	42.122			0.475222
					0.000740539	192								44	0.721311	584.33			0.0172021	192								44	0.374194	88.43			0.747829	92		44	0.415094	141.937			0.00131454	42		44	0.517647	42.664			0.492982
					0.000769233	193								45	0.737705	592.89			0.0174673	193								45	0.382699	88.666			0.767993	93		45	0.424528	142.01			0.00143448	43		45	0.529412	44.2			0.510756
					0.000798949	194								46	0.754098	607.65			0.017736	194								46	0.391203	89.302			0.787225	94		46	0.433962	142.155			0.00156434	44		46	0.541176	51.041			0.528509
					0.000829718	195								47	0.770492	624.36			0.0180081	195								47	0.399707	89.749			0.805494	95		47	0.443396	142.228			0.00170484	45		47	0.552941	52.519			0.546205
					0.000861574	196								48	0.786885	632.09			0.0182838	196								48	0.408212	92.483			0.822774	96		48	0.45283	143.172			0.00185672	46		48	0.564706	52.6			0.56381
					0.000894551	197								49	0.803279	643.46			0.0185632	197								49	0.416716	93.048			0.839051	97		49	0.462264	143.68			0.00202082	47		49	0.576471	53.3793			0.58129
					0.000928685	198								50	0.819672	670.15			0.0188461	198								50	0.425221	93.066			0.85432	98		50	0.471698	144			0.00219797	48		50	0.588235	53.515			0.59861
					0.000964012	199								51	0.836066	672.13			0.0191327	199								51	0.433725	94.005			0.868584	99		51	0.481132	144			0.00238908	49		51	0.6	54.6			0.615739
					0.00100057	200								52	0.852459	678.84			0.019423	200								52	0.44223	96.882			0.881853	100		52	0.490566	144.77			0.00259511	50		52	0.611765	55.8474			0.632645
					0.00103839	201								53	0.868852	678.86			0.019717	201								53	0.450734	97.273			0.894145	101		53	0.5	144.79			0.00281706	51		53	0.623529	57.794			0.649297
					0.00107753	202								54	0.885246	687.77			0.0200148	202								54	0.459238	97.944			0.905485	102		54	0.509434	146.63			0.00305599	52		54	0.635294	57.813			0.665668
					0.00111801	203								55	0.901639	705.77			0.0203164	203								55	0.467743	98.371			0.915903	103		55	0.518868	147.022			0.00331303	53		55	0.647059	57.894			0.681729
					0.00115988	204								56	0.918033	707.81			0.0206219	204								56	0.476247	98.766			0.925435	104		56	0.528302	148.62			0.00358934	54		56	0.658824	58.682			0.697455
					0.00120318	205								57	0.934426	709.66			0.0209312	205								57	0.484752	100.519			0.934119	105		57	0.537736	148.91			0.00388616	55		57	0.670588	59.077			0.712824
					0.00124796	206								58	0.95082	766.67			0.0212444	206								58	0.493256	101.372			0.941998	106		58	0.54717	149.419			0.00420479	56		58	0.682353	59.913			0.727813
					0.00129425	207								59	0.967213	773.05			0.0215616	207								59	0.50176	101.425			0.949116	107		59	0.556604	150.073			0.00454659	57		59	0.694118	60.126			0.742402
					0.00134212	208								60	0.983607	784.9			0.0218828	208								60	0.510265	102.044			0.955521	108		60	0.566038	150.145			0.00491298	58		60	0.705882	60.236			0.756574
					0.00139159	209								61		793.71			0.0222081	209								61	0.518769	102.629			0.96126	109		61	0.575472	152.324			0.00530545	59		61	0.717647	60.6738			0.770314
					0.00144272	210								62		798.29			0.0225374	210								62	0.527274	103.162			0.966381	110		62	0.584906	152.397			0.00572556	60		62	0.729412	61.5862			0.783609
					0.00149557	211								63		814.38			0.0228708	211								63	0.535778	105.33			0.970931	111		63	0.59434	152.615			0.00617494	61		63	0.741176	61.7931			0.796447
					0.00155017	212								64		843.17			0.0232083	212								64	0.544282	105.612			0.974957	112		64	0.603774	152.906			0.00665529	62		64	0.752941	63.577			0.80882
					0.00160659	213								65		944.98			0.0235501	213								65	0.552787	133.454			0.978505	113		65	0.613208	153.684			0.00716838	63		65	0.764706	63.9			0.82072
					0.00166487	214													0.023896	214													0.981619	114		66	0.622642	153.9			0.00771604	64		66	0.776471	64.1211			0.832143
					0.00172507	215													0.0242462	215													0.984339	115		67	0.632075	154.442			0.0083002	65		67	0.788235	64.1379			0.843087
					0.00178725	216													0.0246008	216													0.986707	116		68	0.641509	155.521			0.00892285	66		68	0.8	64.19			0.853551
					0.00185146	217													0.0249596	217													0.988759	117		69	0.650943	155.811			0.00958604	67		69	0.811765	64.3448			0.863535
					0.00191776	218													0.0253229	218													0.99053	118		70	0.660377	156.465			0.0102919	68		70	0.823529	65.3			0.873044
					0.0019862	219													0.0256905	219													0.992052	119		71	0.669811	156.901			0.0110427	69		71	0.835294	66.8			0.882082
					0.00205686	220													0.0260626	220													0.993354	120		72	0.679245	158.499			0.0118407	70		72	0.847059	67.364			0.890654
					0.0021298	221													0.0264392	221													0.994464	121		73	0.688679	159.1			0.0126882	71		73	0.858824	67.7			0.89877
					0.00220507	222													0.0268204	222													0.995407	122		74	0.698113	161.041			0.0135878	72		74	0.870588	69.3			0.906437
					0.00228274	223													0.0272061	223													0.996203	123		75	0.707547	161.332			0.0145418	73		75	0.882353	70			0.913667
					0.00236288	224													0.0275965	224													0.996873	124		76	0.716981	163.366			0.015553	74		76	0.894118	70.3264			0.920471
					0.00244557	225													0.0279915	225													0.997435	125		77	0.726415	164.019			0.0166239	75		77	0.905882	70.3448			0.926861
					0.00253086	226													0.0283911	226													0.997904	126		78	0.735849	165.474			0.0177573	76		78	0.917647	70.6			0.93285
					0.00261883	227													0.0287956	227													0.998294	127		79	0.745283	166.634			0.018956	77		79	0.929412	71.0159			0.938453
					0.00270955	228													0.0292048	228													0.998616	128		80	0.754717	167.37			0.0202228	78		80	0.941176	71.7053			0.943684
					0.0028031	229													0.0296188	229													0.998882	129		81	0.764151	174.7			0.0215607	79		81	0.952941	75.3793			0.948558
					0.00289956	230													0.0300377	230													0.999101	130		82	0.773585	184.69			0.0229726	80		82	0.964706	79.979			0.953091
					0.002999	231													0.0304615	231													0.999279	131		83	0.783019	186.345			0.0244616	81		83	0.976471	81.0345			0.957297
					0.0031015	232													0.0308902	232													0.999425	132		84	0.792453	187.9			0.0260308	82		84	0.988235	81.358			0.961193
					0.00320715	233													0.031324	233													0.999542	133		85	0.801887	192.9			0.0276834	83			0				0.964795
					0.00331602	234													0.0317627	234													0.999638	134		86	0.811321	193			0.0294224	84			0				0.968117
					0.0034282	235													0.0322065	235													0.999714	135		87	0.820755	193			0.0312512	85			0				0.971177
					0.00354378	236													0.0326554	236													0.999775	136		88	0.830189	195.862			0.033173	86			0				0.973988
					0.00366285	237													0.0331095	237													0.999824	137		89	0.839623	196.5			0.0351912	87			0				0.976566
					0.0037855	238													0.0335687	238													0.999863	138		90	0.849057	197			0.037309	88			0				0.978926
					0.00391181	239													0.0340332	239													0.999893	139		91	0.858491	201.3			0.0395297	89			0				0.981081
					0.00404189	240													0.034503	240													0.999918	140		92	0.867925	205.3			0.0418569	90			0				0.983046
					0.00417583	241													0.034978	241													0.999936	141		93	0.877358	208.503			0.0442937	91			0				0.984834
					0.00431372	242													0.0354584	242													0.999951	142		94	0.886792	209.386			0.0468436	92			0				0.986457
					0.00445567	243													0.0359442	243													0.999963	143		95	0.896226	213.7			0.0495099	93			0				0.987928
					0.00460178	244													0.0364355	244													0.999972	144		96	0.90566	216.655			0.052296	94			0				0.989259
					0.00475214	245													0.0369322	245													0.999978	145		97	0.915094	217.9			0.0552052	95			0				0.99046
					0.00490688	246													0.0374345	246													0.999984	146		98	0.924528	224.49			0.0582407	96			0				0.991542
					0.00506609	247													0.0379423	247													0.999988	147		99	0.933962	226			0.0614058	97			0				0.992514
					0.00522988	248													0.0384557	248													0.999991	148		100	0.943396	226.15			0.0647037	98			0				0.993387
					0.00539836	249													0.0389748	249													0.999993	149		101	0.95283	234.421			0.0681376	99			0				0.994168
					0.00557166	250													0.0394996	250													0.999995	150		102	0.962264	244.07			0.0717104	100			0				0.994867
					0.00574988	251													0.0400301	251																103	0.971698	251			0.0754252	101			0
					0.00593314	252													0.0405664	252																104	0.981132	251			0.079285	102			0
					0.00612156	253													0.0411085	253																105	0.990566	281			0.0832924	103			0
					0.00631526	254													0.0416564	254																					0.0874502	104			0
					0.00651437	255													0.0422103	255																					0.091761	105			0
					0.00671901	256													0.0427701	256																					0.0962272	106			0
					0.00692931	257													0.0433359	257																					0.100851	107			0
					0.0071454	258													0.0439077	258																					0.105635	108			0
					0.00736742	259													0.0444856	259																					0.110581	109			0
					0.00759549	260													0.0450696	260																					0.115691	110			0
					0.00782976	261													0.0456597	261																					0.120966	111			0
					0.00807036	262													0.0462561	262																					0.126408	112			0
					0.00831743	263													0.0468586	263																					0.132019	113			0
					0.00857112	264													0.0474675	264																					0.137799	114			0
					0.00883158	265													0.0480827	265																					0.143749	115			0
					0.00909894	266													0.0487042	266																					0.14987	116			0
					0.00937337	267													0.0493322	267																					0.156163	117			0
					0.00965501	268													0.0499666	268																					0.162627	118			0
					0.00994402	269													0.0506075	269																					0.169263	119			0
					0.0102406	270													0.0512549	270																					0.176071	120			0
					0.0105448	271													0.0519089	271																					0.183049	121			0
					0.0108568	272													0.0525695	272																					0.190197	122			0
					0.0111769	273													0.0532368	273																					0.197514	123			0
					0.0115051	274													0.0539107	274																					0.204998	124			0
					0.0118417	275													0.0545914	275																					0.212649	125			0
					0.0121868	276													0.0552789	276																					0.220464	126			0
					0.0125406	277													0.0559732	277																					0.228441	127			0
					0.0129032	278													0.0566744	278																					0.236578	128			0
					0.0132749	279													0.0573824	279																					0.244872	129			0
					0.0136557	280													0.0580974	280																					0.253319	130			0
					0.014046	281													0.0588194	281																					0.261918	131			0
					0.0144458	282													0.0595484	282																					0.270663	132			0
					0.0148554	283													0.0602845	283																					0.279552	133			0
					0.015275	284													0.0610276	284																					0.288581	134			0
					0.0157047	285													0.0617779	285																					0.297744	135			0
					0.0161447	286													0.0625354	286																					0.307038	136			0
					0.0165952	287													0.0633002	287																					0.316458	137			0
					0.0170564	288													0.0640721	288																					0.325998	138			0
					0.0175286	289													0.0648514	289																					0.335654	139			0
					0.0180119	290													0.065638	290																					0.345419	140			0
					0.0185065	291													0.066432	291																					0.355288	141			0
					0.0190126	292													0.0672334	292																					0.365256	142			0
					0.0195304	293													0.0680423	293																					0.375315	143			0
					0.0200602	294													0.0688586	294																					0.38546	144			0
					0.0206021	295													0.0696825	295																					0.395683	145			0
					0.0211563	296													0.0705139	296																					0.405979	146			0
					0.0217231	297													0.071353	297																					0.416341	147			0
					0.0223027	298													0.0721997	298																					0.42676	148			0
					0.0228953	299													0.0730541	299																					0.437232	149			0
					0.0235011	300													0.0739162	300																					0.447747	150			0
					0.0241203	301													0.074786	301																					0.458299	151			0
					0.0247531	302													0.0756636	302																					0.468881	152			0
					0.0253999	303													0.0765491	303																					0.479485	153			0
					0.0260607	304													0.0774424	304																					0.490103	154			0
					0.0267359	305													0.0783436	305																					0.500729	155			0
					0.0274255	306													0.0792528	306																					0.511353	156			0
					0.02813	307													0.0801699	307																					0.52197	157			0
					0.0288495	308													0.081095	308																					0.532571	158			0
					0.0295842	309													0.0820281	309																					0.54315	159			0
					0.0303343	310													0.0829693	310																					0.553697	160			0
					0.0311002	311													0.0839186	311																					0.564207	161			0
					0.031882	312													0.0848761	312																					0.574672	162			0
					0.0326799	313													0.0858417	313																					0.585084	163			0
					0.0334942	314													0.0868155	314																					0.595437	164			0
					0.0343252	315													0.0877975	315																					0.605723	165			0
					0.035173	316													0.0887878	316																					0.615936	166
					0.036038	317													0.0897864	317																					0.62607	167
					0.0369203	318													0.0907933	318																					0.636117	168
					0.0378201	319													0.0918086	319																					0.646071	169
					0.0387378	320													0.0928323	320																					0.655926	170
					0.0396736	321													0.0938643	321																					0.665677	171
					0.0406276	322													0.0949049	322																					0.675317	172
					0.0416002	323													0.0959539	323																					0.684841	173
					0.0425916	324													0.0970113	324																					0.694244	174
					0.0436019	325													0.0980774	325																					0.70352	175
					0.0446316	326													0.099152	326																					0.712666	176
					0.0456807	327													0.100235	327																					0.721675	177
					0.0467496	328													0.101327	328																					0.730545	178
					0.0478384	329													0.102427	329																					0.73927	179
					0.0489474	330													0.103536	330																					0.747848	180
					0.0500769	331													0.104654	331																					0.756275	181
					0.0512271	332													0.105781	332																					0.764547	182
					0.0523982	333													0.106916	333																					0.772662	183
					0.0535904	334													0.10806	334																					0.780617	184
					0.0548041	335													0.109213	335																					0.78841	185
					0.0560393	336													0.110374	336																					0.796038	186
					0.0572964	337													0.111545	337																					0.8035	187
					0.0585756	338													0.112724	338																					0.810794	188
					0.0598771	339													0.113912	339																					0.817918	189
					0.0612012	340													0.115109	340																					0.824873	190
					0.062548	341													0.116315	341																					0.831657	191
					0.0639179	342													0.11753	342																					0.838269	192
					0.0653109	343													0.118754	343																					0.84471	193
					0.0667274	344													0.119987	344																					0.850979	194
					0.0681675	345													0.121228	345																					0.857077	195
					0.0696315	346													0.122479	346																					0.863004	196
					0.0711196	347													0.123739	347																					0.86876	197
					0.072632	348													0.125008	348																					0.874348	198
					0.0741689	349													0.126286	349																					0.879767	199
					0.0757305	350													0.127573	350																					0.88502	200
					0.0773171	351													0.128869	351																					0.890107	201
					0.0789288	352													0.130174	352																					0.89503	202
					0.0805657	353													0.131489	353																					0.899792	203
					0.0822282	354													0.132812	354																					0.904394	204
					0.0839165	355													0.134145	355																					0.908839	205
					0.0856306	356													0.135487	356																					0.913129	206
					0.0873708	357													0.136838	357																					0.917266	207
					0.0891372	358													0.138198	358																					0.921253	208
					0.0909301	359													0.139567	359																					0.925093	209
					0.0927496	360													0.140946	360																					0.928788	210
					0.0945959	361													0.142333	361																					0.932341	211
					0.0964692	362													0.14373	362																					0.935756	212
					0.0983695	363													0.145137	363																					0.939036	213
					0.100297	364													0.146552	364																					0.942183	214
					0.102252	365													0.147977	365																					0.945201	215
					0.104235	366													0.14941	366																					0.948093	216
					0.106245	367													0.150854	367																					0.950863	217
					0.108283	368													0.152306	368																					0.953513	218
					0.11035	369													0.153768	369																					0.956047	219
					0.112444	370													0.155238	370																					0.958469	220
					0.114566	371													0.156719	371																					0.960781	221
					0.116717	372													0.158208	372																					0.962987	222
					0.118897	373													0.159707	373																					0.965091	223
					0.121105	374													0.161215	374																					0.967096	224
					0.123341	375													0.162732	375																					0.969005	225
					0.125607	376													0.164258	376																					0.970821	226
					0.127901	377													0.165794	377																					0.972548	227
					0.130224	378													0.167339	378																					0.974189	228
					0.132577	379													0.168893	379																					0.975747	229
					0.134958	380													0.170456	380																					0.977225	230
					0.137369	381													0.172029	381																					0.978627	231
					0.139809	382													0.173611	382																					0.979955	232
					0.142278	383													0.175202	383																					0.981212	233
					0.144776	384													0.176802	384																					0.982402	234
					0.147304	385													0.178412	385																					0.983527	235
					0.149861	386													0.180031	386																					0.984589	236
					0.152448	387													0.181659	387																					0.985592	237
					0.155064	388													0.183296	388																					0.986539	238
					0.15771	389													0.184942	389																					0.987431	239
					0.160385	390													0.186597	390																					0.988272	240
					0.16309	391													0.188262	391																					0.989063	241
					0.165824	392													0.189936	392																					0.989807	242
					0.168587	393													0.191619	393																					0.990507	243
					0.17138	394													0.19331	394																					0.991165	244
					0.174202	395													0.195011	395																					0.991782	245
					0.177054	396													0.196722	396																					0.992361	246
					0.179935	397													0.198441	397																					0.992904	247
					0.182846	398													0.200169	398																					0.993412	248
					0.185785	399													0.201906	399																					0.993888	249
					0.188754	400													0.203652	400																					0.994334	250
					0.191751	401													0.205407	401																					0.99475	251
					0.194778	402													0.207171	402																					0.995139	252
					0.197834	403													0.208944	403																					0.995502	253
					0.200918	404													0.210726	404																					0.99584	254
					0.204031	405													0.212517	405																					0.996156	255
					0.207172	406													0.214317	406																					0.99645	256
					0.210342	407													0.216125	407																					0.996723	257
					0.213541	408													0.217943	408																					0.996978	258
					0.216767	409													0.219769	409																					0.997214	259
					0.220022	410													0.221604	410																					0.997434	260
					0.223304	411													0.223447	411																					0.997638	261
					0.226614	412													0.2253	412																					0.997827	262
					0.229951	413													0.227161	413																					0.998002	263
					0.233316	414													0.22903	414																					0.998165	264
					0.236708	415													0.230908	415																					0.998315	265
					0.240127	416													0.232795	416																					0.998454	266
					0.243573	417													0.23469	417																					0.998583	267
					0.247045	418													0.236594	418																					0.998701	268
					0.250544	419													0.238506	419																					0.998811	269
					0.254068	420													0.240427	420																					0.998912	270
					0.257619	421													0.242356	421																					0.999005	271
					0.261195	422													0.244293	422																					0.99909	272
					0.264796	423													0.246239	423																					0.999169	273
					0.268423	424													0.248193	424																					0.999242	274
					0.272074	425													0.250155	425																					0.999309	275
					0.27575	426													0.252126	426																					0.99937	276
					0.27945	427													0.254105	427																					0.999426	277
					0.283174	428													0.256091	428																					0.999477	278
					0.286921	429													0.258086	429																					0.999525	279
					0.290692	430													0.260089	430																					0.999568	280
					0.294486	431													0.2621	431																					0.999607	281
					0.298303	432													0.264118	432																					0.999644	282
					0.302142	433													0.266145	433																					0.999677	283
					0.306003	434													0.26818	434																					0.999707	284
					0.309886	435													0.270222	435																					0.999734	285
					0.31379	436													0.272272	436																					0.99976	286
					0.317715	437													0.27433	437																					0.999782	287
					0.32166	438													0.276395	438																					0.999803	288
					0.325626	439													0.278468	439																					0.999822	289
					0.329612	440													0.280548	440																					0.999839	290
					0.333617	441													0.282636	441																					0.999855	291
					0.337641	442													0.284732	442																					0.999869	292
					0.341684	443													0.286835	443																					0.999882	293
					0.345745	444													0.288945	444																					0.999894	294
					0.349824	445													0.291062	445																					0.999905	295
					0.35392	446													0.293187	446																					0.999914	296
					0.358033	447													0.295319	447																					0.999923	297
					0.362163	448													0.297458	448																					0.999931	298
					0.366309	449													0.299604	449																					0.999938	299
					0.370471	450													0.301757	450																					0.999944	300
					0.374647	451													0.303917	451
					0.378839	452													0.306083	452
					0.383045	453													0.308257	453
					0.387264	454													0.310437	454
					0.391497	455													0.312624	455
					0.395743	456													0.314818	456
					0.400002	457													0.317018	457
					0.404272	458													0.319225	458
					0.408554	459													0.321438	459
					0.412846	460													0.323657	460
					0.417149	461													0.325883	461
					0.421462	462													0.328115	462
					0.425785	463													0.330353	463
					0.430116	464													0.332597	464
					0.434456	465													0.334847	465
					0.438804	466													0.337104	466
					0.443159	467													0.339366	467
					0.447521	468													0.341633	468
					0.45189	469													0.343907	469
					0.456264	470													0.346186	470
					0.460643	471													0.348471	471
					0.465028	472													0.350761	472
					0.469416	473													0.353057	473
					0.473809	474													0.355358	474
					0.478204	475													0.357664	475
					0.482602	476													0.359976	476
					0.487002	477													0.362293	477
					0.491404	478													0.364615	478
					0.495807	479													0.366941	479
					0.50021	480													0.369273	480
					0.504614	481													0.371609	481
					0.509017	482													0.373951	482
					0.513418	483													0.376297	483
					0.517818	484													0.378647	484
					0.522216	485													0.381002	485
					0.526611	486													0.383361	486
					0.531003	487													0.385725	487
					0.535391	488													0.388093	488
					0.539775	489													0.390465	489
					0.544154	490													0.392841	490
					0.548528	491													0.395222	491
					0.552896	492													0.397606	492
					0.557257	493													0.399994	493
					0.561612	494													0.402385	494
					0.565959	495													0.404781	495
					0.570298	496													0.40718	496
					0.574628	497													0.409582	497
					0.57895	498													0.411988	498
					0.583262	499													0.414397	499
					0.587564	500													0.416809	500
					0.591856	501													0.419225	501
					0.596137	502													0.421643	502
					0.600406	503													0.424065	503
					0.604663	504													0.426489	504
					0.608908	505													0.428916	505
					0.613139	506													0.431346	506
					0.617358	507													0.433779	507
					0.621562	508													0.436214	508
					0.625752	509													0.438651	509
					0.629928	510													0.441091	510
					0.634088	511													0.443533	511
					0.638232	512													0.445977	512
					0.642361	513													0.448423	513
					0.646472	514													0.450871	514
					0.650567	515													0.453321	515
					0.654644	516													0.455773	516
					0.658703	517													0.458226	517
					0.662744	518													0.460681	518
					0.666767	519													0.463138	519
					0.67077	520													0.465596	520
					0.674754	521													0.468055	521
					0.678718	522													0.470516	522
					0.682661	523													0.472977	523
					0.686584	524													0.47544	524
					0.690486	525													0.477903	525
					0.694367	526													0.480368	526
					0.698226	527													0.482833	527
					0.702063	528													0.485299	528
					0.705877	529													0.487765	529
					0.709669	530													0.490232	530
					0.713438	531													0.492699	531
					0.717183	532													0.495167	532
					0.720905	533													0.497634	533
					0.724603	534													0.500102	534
					0.728276	535													0.50257	535
					0.731925	536													0.505038	536
					0.735549	537													0.507505	537
					0.739148	538													0.509972	538
					0.742722	539													0.512439	539
					0.74627	540													0.514905	540
					0.749792	541													0.517371	541
					0.753288	542													0.519836	542
					0.756757	543													0.522301	543
					0.760201	544													0.524764	544
					0.763617	545													0.527227	545
					0.767006	546													0.529688	546
					0.770369	547													0.532149	547
					0.773704	548													0.534608	548
					0.777011	549													0.537066	549
					0.780291	550													0.539522	550
					0.783542	551													0.541977	551
					0.786766	552													0.54443	552
					0.789962	553													0.546882	553
					0.793129	554													0.549332	554
					0.796268	555													0.55178	555
					0.799378	556													0.554226	556
					0.80246	557													0.556669	557
					0.805512	558													0.559111	558
					0.808536	559													0.561551	559
					0.811531	560													0.563988	560
					0.814497	561													0.566423	561
					0.817434	562													0.568855	562
					0.820341	563													0.571285	563
					0.82322	564													0.573711	564
					0.826068	565													0.576136	565
					0.828888	566													0.578557	566
					0.831678	567													0.580975	567
					0.834439	568													0.58339	568
					0.83717	569													0.585802	569
					0.839872	570													0.588211	570
					0.842544	571													0.590617	571
					0.845187	572													0.593019	572
					0.8478	573													0.595418	573
					0.850384	574													0.597813	574
					0.852939	575													0.600204	575
					0.855464	576													0.602592	576
					0.857959	577													0.604976	577
					0.860426	578													0.607355	578
					0.862863	579													0.609731	579
					0.865271	580													0.612103	580
					0.867649	581													0.614471	581
					0.869999	582													0.616834	582
					0.872319	583													0.619193	583
					0.874611	584													0.621548	584
					0.876874	585													0.623898	585
					0.879107	586													0.626243	586
					0.881313	587													0.628584	587
					0.883489	588													0.63092	588
					0.885638	589													0.633251	589
					0.887757	590													0.635578	590
					0.889849	591													0.637899	591
					0.891913	592													0.640215	592
					0.893948	593													0.642527	593
					0.895956	594													0.644833	594
					0.897936	595													0.647133	595
					0.899888	596													0.649429	596
					0.901813	597													0.651718	597
					0.903711	598													0.654003	598
					0.905582	599													0.656281	599
					0.907425	600													0.658555	600
					0.909242	601													0.660822	601
					0.911033	602													0.663083	602
					0.912797	603													0.665339	603
					0.914534	604													0.667589	604
					0.916246	605													0.669832	605
					0.917932	606													0.67207	606
					0.919592	607													0.674302	607
					0.921226	608													0.676527	608
					0.922836	609													0.678746	609
					0.92442	610													0.680958	610
					0.925979	611													0.683164	611
					0.927514	612													0.685364	612
					0.929024	613													0.687557	613
					0.930509	614													0.689743	614
					0.931971	615													0.691923	615
					0.933409	616													0.694096	616
					0.934823	617													0.696262	617
					0.936214	618													0.698422	618
					0.937582	619													0.700574	619
					0.938926	620													0.70272	620
					0.940248	621													0.704858	621
					0.941548	622													0.706989	622
					0.942825	623													0.709113	623
					0.94408	624													0.71123	624
					0.945313	625													0.71334	625
					0.946524	626													0.715442	626
					0.947715	627													0.717537	627
					0.948884	628													0.719624	628
					0.950032	629													0.721704	629
					0.951159	630													0.723776	630
					0.952267	631													0.725841	631
					0.953353	632													0.727898	632
					0.95442	633													0.729947	633
					0.955468	634													0.731989	634
					0.956495	635													0.734023	635
					0.957504	636													0.736049	636
					0.958494	637													0.738067	637
					0.959464	638													0.740077	638
					0.960417	639													0.742079	639
					0.961351	640													0.744073	640
					0.962267	641													0.74606	641
					0.963165	642													0.748037	642
					0.964045	643													0.750007	643
					0.964909	644													0.751969	644
					0.965755	645													0.753922	645
					0.966584	646													0.755867	646
					0.967397	647													0.757804	647
					0.968193	648													0.759732	648
					0.968974	649													0.761652	649
					0.969738	650													0.763564	650
					0.970487	651													0.765467	651
					0.97122	652													0.767362	652
					0.971938	653													0.769248	653
					0.972641	654													0.771125	654
					0.973329	655													0.772994	655
					0.974003	656													0.774854	656
					0.974663	657													0.776706	657
					0.975308	658													0.778548	658
					0.975939	659													0.780383	659
					0.976557	660													0.782208	660
					0.977162	661													0.784025	661
					0.977753	662													0.785832	662
					0.978332	663													0.787631	663
					0.978897	664													0.789421	664
					0.97945	665													0.791203	665
					0.979991	666													0.792975	666
					0.98052	667													0.794738	667
					0.981036	668													0.796493	668
					0.981541	669													0.798238	669
					0.982035	670													0.799975	670
					0.982517	671													0.801702	671
					0.982988	672													0.80342	672
					0.983448	673													0.80513	673
					0.983898	674													0.80683	674
					0.984337	675													0.808521	675
					0.984766	676													0.810203	676
					0.985184	677													0.811876	677
					0.985593	678													0.81354	678
					0.985992	679													0.815195	679
					0.986381	680													0.81684	680
					0.986761	681													0.818477	681
					0.987132	682													0.820104	682
					0.987494	683													0.821722	683
					0.987847	684													0.82333	684
					0.988191	685													0.82493	685
					0.988527	686													0.82652	686
					0.988854	687													0.828102	687
					0.989173	688													0.829673	688
					0.989485	689													0.831236	689
					0.989788	690													0.832789	690
					0.990084	691													0.834334	691
					0.990372	692													0.835869	692
					0.990653	693													0.837394	693
					0.990927	694													0.838911	694
					0.991194	695													0.840418	695
					0.991453	696													0.841916	696
					0.991706	697													0.843404	697
					0.991953	698													0.844884	698
					0.992193	699													0.846354	699
					0.992427	700													0.847815	700
					0.992654	701													0.849266	701
					0.992876	702													0.850709	702
					0.993091	703													0.852142	703
					0.993301	704													0.853566	704
					0.993505	705													0.85498	705
					0.993703	706													0.856386	706
					0.993897	707													0.857782	707
					0.994085	708													0.859169	708
					0.994267	709													0.860547	709
					0.994445	710													0.861915	710
					0.994618	711													0.863274	711
					0.994786	712													0.864625	712
					0.994949	713													0.865966	713
					0.995108	714													0.867298	714
					0.995262	715													0.86862	715
					0.995412	716													0.869934	716
					0.995558	717													0.871238	717
					0.9957	718													0.872534	718
					0.995837	719													0.87382	719
					0.995971	720													0.875097	720
					0.9961	721													0.876365	721
					0.996226	722													0.877625	722
					0.996349	723													0.878875	723
					0.996467	724													0.880116	724
					0.996583	725													0.881348	725
					0.996695	726													0.882571	726
					0.996803	727													0.883785	727
					0.996908	728													0.88499	728
					0.997011	729													0.886187	729
					0.99711	730													0.887374	730
					0.997206	731													0.888553	731
					0.997299	732													0.889722	732
					0.99739	733													0.890883	733
					0.997477	734													0.892035	734
					0.997562	735													0.893178	735
					0.997645	736													0.894313	736
					0.997725	737													0.895439	737
					0.997802	738													0.896556	738
					0.997877	739													0.897664	739
					0.99795	740													0.898764	740
					0.99802	741													0.899855	741
					0.998089	742													0.900937	742
					0.998155	743													0.902011	743
					0.998219	744													0.903077	744
					0.998281	745													0.904133	745
					0.998341	746													0.905182	746
					0.998399	747													0.906221	747
					0.998455	748													0.907253	748
					0.99851	749													0.908276	749
					0.998562	750													0.90929	750
					0.998613	751													0.910297	751
					0.998663	752													0.911294	752
					0.99871	753													0.912284	753
					0.998756	754													0.913265	754
					0.998801	755													0.914239	755
					0.998844	756													0.915203	756
					0.998886	757													0.91616	757
					0.998926	758													0.917109	758
					0.998965	759													0.918049	759
					0.999003	760													0.918982	760
					0.999039	761													0.919906	761
					0.999075	762													0.920823	762
					0.999109	763													0.921731	763
					0.999142	764													0.922632	764
					0.999173	765													0.923524	765
					0.999204	766													0.924409	766
					0.999234	767													0.925286	767
					0.999262	768													0.926155	768
					0.99929	769													0.927017	769
					0.999316	770													0.927871	770
					0.999342	771													0.928717	771
					0.999367	772													0.929555	772
					0.999391	773													0.930386	773
					0.999414	774													0.931209	774
					0.999436	775													0.932025	775
					0.999458	776													0.932833	776
					0.999479	777													0.933634	777
					0.999499	778													0.934427	778
					0.999518	779													0.935213	779
					0.999537	780													0.935992	780
					0.999555	781													0.936763	781
					0.999572	782													0.937528	782
					0.999589	783													0.938284	783
					0.999605	784													0.939034	784
					0.99962	785													0.939777	785
					0.999635	786													0.940512	786
					0.999649	787													0.941241	787
					0.999663	788													0.941962	788
					0.999677	789													0.942676	789
					0.999689	790													0.943384	790
					0.999702	791													0.944085	791
					0.999714	792													0.944778	792
					0.999725	793													0.945465	793
					0.999736	794													0.946145	794
					0.999747	795													0.946819	795
					0.999757	796													0.947485	796
					0.999767	797													0.948145	797
					0.999776	798													0.948799	798
					0.999786	799													0.949446	799
					0.999794	800													0.950086	800
					0.999803	801													0.95072	801
					0.999811	802													0.951347	802
					0.999819	803													0.951968	803
					0.999826	804													0.952583	804
					0.999833	805													0.953191	805
					0.99984	806													0.953794	806
					0.999847	807													0.954389	807
					0.999853	808													0.954979	808
					0.999859	809													0.955562	809
					0.999865	810													0.95614	810
					0.999871	811													0.956711	811
					0.999876	812													0.957276	812
					0.999882	813													0.957836	813
					0.999887	814													0.958389	814
					0.999891	815													0.958937	815
					0.999896	816													0.959478	816
					0.9999	817													0.960014	817
					0.999905	818													0.960544	818
					0.999909	819													0.961068	819
					0.999913	820													0.961587	820
					0.999917	821													0.9621	821
					0.99992	822													0.962607	822
					0.999924	823													0.963109	823
					0.999927	824													0.963605	824
					0.99993	825													0.964096	825
					0.999933	826													0.964582	826
					0.999936	827													0.965062	827
					0.999939	828													0.965536	828
					0.999942	829													0.966005	829
					0.999944	830													0.966469	830
					0.999947	831													0.966928	831
					0.999949	832													0.967382	832
					0.999951	833													0.96783	833
					0.999953	834													0.968274	834
					0.999956	835													0.968712	835
					0.999958	836													0.969145	836
					0.999959	837													0.969574	837
					0.999961	838													0.969997	838
					0.999963	839													0.970416	839
					0.999965	840													0.970829	840
					0.999966	841													0.971238	841
					0.999968	842													0.971642	842
					0.999969	843													0.972041	843
					0.999971	844													0.972436	844
					0.999972	845													0.972826	845
					0.999973	846													0.973211	846
					0.999975	847													0.973592	847
					0.999976	848													0.973968	848
					0.999977	849													0.97434	849
					0.999978	850													0.974707	850
					0.999979	851													0.97507	851
					0.99998	852													0.975429	852
					0.999981	853													0.975783	853
					0.999982	854													0.976133	854
					0.999983	855													0.976478	855
					0.999983	856													0.97682	856
					0.999984	857													0.977157	857
					0.999985	858													0.97749	858
					0.999986	859													0.977819	859
					0.999986	860													0.978144	860
					0.999987	861													0.978465	861
					0.999988	862													0.978782	862
					0.999988	863													0.979095	863
					0.999989	864													0.979404	864
					0.999989	865													0.979709	865
					0.99999	866													0.98001	866
					0.99999	867													0.980307	867
					0.999991	868													0.980601	868
					0.999991	869													0.980891	869
					0.999992	870													0.981177	870
					0.999992	871													0.98146	871
					0.999992	872													0.981739	872
					0.999993	873													0.982015	873
					0.999993	874													0.982286	874
					0.999994	875													0.982555	875
					0.999994	876													0.98282	876
					0.999994	877													0.983081	877
					0.999994	878													0.983339	878
					0.999995	879													0.983594	879
					0.999995	880													0.983845	880
					0.999995	881													0.984093	881
					0.999995	882													0.984338	882
					0.999996	883													0.984579	883
					0.999996	884													0.984818	884
					0.999996	885													0.985053	885
					0.999996	886													0.985285	886
					0.999996	887													0.985514	887
					0.999997	888													0.985739	888
					0.999997	889													0.985962	889
					0.999997	890													0.986182	890
					0.999997	891													0.986399	891
					0.999997	892													0.986613	892
					0.999997	893													0.986824	893
					0.999998	894													0.987032	894
					0.999998	895													0.987237	895
					0.999998	896													0.987439	896
					0.999998	897													0.987639	897
					0.999998	898													0.987836	898
					0.999998	899													0.98803	899
					0.999998	900													0.988221	900
					0.999998	901													0.98841	901
					0.999998	902													0.988596	902
					0.999998	903													0.98878	903
					0.999999	904													0.988961	904
					0.999999	905													0.989139	905
					0.999999	906													0.989315	906
					0.999999	907													0.989489	907
					0.999999	908													0.98966	908
					0.999999	909													0.989828	909
					0.999999	910													0.989994	910
					0.999999	911													0.990158	911
					0.999999	912													0.990319	912
					0.999999	913													0.990479	913
					0.999999	914													0.990635	914
					0.999999	915													0.99079	915
					0.999999	916													0.990942	916
					0.999999	917													0.991092	917
					0.999999	918													0.99124	918
					0.999999	919													0.991386	919
					0.999999	920													0.99153	920
					0.999999	921													0.991671	921
					0.999999	922													0.991811	922
					0.999999	923													0.991948	923
					1	924													0.992083	924
					1	925													0.992217	925
					1	926													0.992348	926
					1	927													0.992477	927
					1	928													0.992605	928
					1	929													0.992731	929
					1	930													0.992854	930
					1	931													0.992976	931
					1	932													0.993096	932
					1	933													0.993214	933
					1	934													0.993331	934
					1	935													0.993445	935
					1	936													0.993558	936
					1	937													0.993669	937
					1	938													0.993779	938
					1	939													0.993886	939
					1	940													0.993993	940
					1	941													0.994097	941
					1	942													0.9942	942
					1	943													0.994301	943
					1	944													0.994401	944
					1	945													0.994499	945
					1	946													0.994596	946
					1	947													0.994691	947
					1	948													0.994784	948
					1	949													0.994876	949
					1	950													0.994967	950
					1	951													0.995056	951
					1	952													0.995144	952
					1	953													0.995231	953
					1	954													0.995316	954
					1	955													0.9954	955
					1	956													0.995482	956
					1	957													0.995563	957
					1	958													0.995643	958
					1	959													0.995721	959
					1	960													0.995798	960
					1	961													0.995874	961
					1	962													0.995949	962
					1	963													0.996023	963
					1	964													0.996095	964
					1	965													0.996166	965
					1	966													0.996236	966
					1	967													0.996305	967
					1	968													0.996373	968
					1	969													0.996439	969
					1	970													0.996505	970
					1	971													0.996569	971
					1	972													0.996632	972
					1	973													0.996695	973
					1	974													0.996756	974
					1	975													0.996816	975
					1	976													0.996875	976
					1	977													0.996933	977
					1	978													0.996991	978
					1	979													0.997047	979
					1	980													0.997102	980
					1	981													0.997157	981
					1	982													0.99721	982
					1	983													0.997263	983
					1	984													0.997314	984
					1	985													0.997365	985
					1	986													0.997415	986
					1	987													0.997464	987
					1	988													0.997512	988
					1	989													0.99756	989
					1	990													0.997606	990
					1	991													0.997652	991
					1	992													0.997697	992
					1	993													0.997741	993
					1	994													0.997785	994
					1	995													0.997827	995
					1	996													0.997869	996
					1	997													0.99791	997
					1	998													0.997951	998
					1	999													0.997991	999
					1	1000													0.99803	1000
[truncated: 113 more columns]

## Sheet: 6) UCS_YM_Chart
																				All Data for Trendline										Y Axis Labels			X Axis Labels
																				UCS	YM	Rock Type	Reference							1	0.1		0.1	0.1
																				537.23	80.49	Chert	Aliyu	Sample: SEUK						1	0.2		1	0.1
																				307.991	71.5654	Chert	Aliyu	Sample: BLSUK						1	0.3		2	0.1
																Number of data points in UCS vs YM Chart				502.88	85.13	Chert	Aliyu	Sample: SDFr						1	0.4		3	0.1
																Chert	6			560.31	85.44	Chert	Aliyu	Sample: LMFr						1	0.5		4	0.1
																Silcrete	9			493.18	74.01	Chert	Aliyu	Sample: TSKT						1	0.6		5	0.1
																Quartzite	10			395.76	84.95	Chert	Aliyu	Sample: TMKT						1	0.7		6	0.1
																Basalt	22			561.83	58.313	Silcrete	Webb							1	0.8		7	0.1
																Granite	86			505.51	53.029	Silcrete	Webb							1	0.9		8	0.1
																Carbonates	214			496.36	58.049	Silcrete	Webb							1	1		9	0.1
																Mudstone	239			512.33	57.878	Silcrete	Webb							1	2		10	0.1
																Sandstone	115			584.33	57.535	Silcrete	Webb							1	3		20	0.1
																Diatomite	7			338.34	52.775	Silcrete	Webb							1	4		30	0.1
																Tuff	34			350.28	53.323	Silcrete	Webb							1	5		40	0.1												Location	Egpa X	Sigma1 mpa	Porosity
																				417.59	53.704	Silcrete	Webb							1	6		50	0.1												Canada	13.2	108	0.032
																Total:	742			553	54.375	Silcrete	Webb							1	7		60	0.1												Canada	9.2	97	0.034
																				209	58	Quartzite	Minnesota Quartzite, Rahn, 1996							1	8		70	0.1													Canada	11.2	83.5
																				214.9	47.8621	Quartzite	Han 2009 Table 2							1	9		80	0.1													Canada	10.3	78
																				220.632	38.6106	Quartzite	Jizba, 1991							1	10		90	0.1													North Sea	12.15	78
																				225	22.5	Quartzite	Deere, 1966, Table 4.2							1	20		100	0.1													Australia	5.48	72.5
																				311.5	62.6207	Quartzite	Han 2009 Table 1							1	30		200	0.1													UK	6.65	69.5
																				320.1	88.4	Quartzite	Jizba, 1991							1	40		300	0.1													Canada	8.9	64.5
																				328.19	96.5264	Quartzite	Deere, 1966, Table 4.2							1	50		400	0.1													Australia	3.35	63.4
																				340	39	Quartzite	Palmstrom, 2001,							1	60		500	0.1													UK	6.7	63.2
																				374	70	Quartzite	D'Andrea, 1965, mean of 17 samples from same locality							1	70		600	0.1													Iran	7.9	58.5
																				629	84.8	Quartzite	D'Andrea, 1965, mean of 26 samples from same locality							1	80		700	0.1													Australia	3.25	58
																				234.421	51.0211	Basalt	Deere, 1966, Table 4.2							1	90		800	0.1													UK	5.95	57.5
																				306.127	79.2896	Basalt	Deere, 1966, Table 4.2							1	100		900	0.1													UK	4.85	55.4
																				368.869	85.4948	Basalt	Deere, 1966, Table 4.2							1	200		1000	0.1													UK	4.35	54.5
																				68.258	39.9895	Basalt	Brandon, 1974							1	300																Canada	6.2	54
																				171.679	57.2264	Basalt	Brandon, 1974							1	400																UK	5.74	53.5
																				57.9159	33.7842	Basalt	Brandon, 1974							1	500																Australia	2.96	52.9
																				95.837	59.9843	Basalt	Brandon, 1974							1	600																Australia	2.54	52.3
																				61.3632	44.1264	Basalt	Brandon, 1974							1	700																UK	4.9	48.5
																				120	41	Basalt	Rahn, 1996							1	800																UK	4.84	47.8
																				58	32.4	Basalt	Rahn, 1996							1	900																UK	4.1	47
																				148	33.9	Basalt	Rahn, 1996							1	1000																UK	3.6	46
																				130.449	23.9937	Basalt	Stowe_1969																								Canada	6.6	46
																				142.928	29.3027	Basalt	Stowe_1969																								Iran	6.8	45
																				146.513	34.4737	Basalt	Stowe_1969																								UK	4.28	45
																				147.341	32.1295	Basalt	Stowe_1969																								UK	3.8	40.5
																				147.616	37.0248	Basalt	Stowe_1969																								UK	4.17	39.5
																				150.374	33.0948	Basalt	Stowe_1969																								UK	3.85	39
																				153.822	27.579	Basalt	Stowe_1969																								UK	3.95	38
																				156.786	28.7511	Basalt	Stowe_1969																								UK	3.75	38
																				157.545	32.4742	Basalt	Stowe_1969																								Iran	4.62	34
																				149.172	67.3793	Basalt	D'Andrea, 1965,mean of 5 samples from same locality																								UK	3.45	33.7
																				292.062	100.552	Basalt	D'Andrea, 1965,mean of 10 samples from same locality																								Iran	6.16	32.5
																				193	19.1	Granite	Han 2009 Table 2																								UK	2.95	32
																				251	25.4	Granite	Rahn, 1996																								UK	3.72	31.5
																				226.15	27.37	Granite	Han 2009 Table 1																								UK	3	29
																				93.0791	33.0948	Granite	Deere, 1966, Table 4.2																									North Sea	3.9
																				193	39	Granite	Rahn, 1996																									Iran	4.7
																				244.07	44.2	Granite	Han 2009 Table 1																								Iran	3.1	26
																				192.9	52.6	Granite	Ljunggren, 1985																								UK	2.9	24.5
																				251	54.6	Granite	Han 2009 Table 2																								North Sea	2.53	23.5
																				144.79	55.8474	Granite	Brandon, 1974																								Iran	4.63	23
																				196.5	60.6738	Granite	Deere, 1966, Table 4.2																								North Sea	1.9	20
																				174.7	63.9	Granite	Ljunggren, 1985																								Iran	3.25	19.5
																				126.863	64.1211	Granite	Brandon, 1974																								Iran	1.6	19.3
																				213.7	65.3	Granite	Ljunggren, 1985																								North Sea	2.45	18.5
Extremely Strong		Very Strong		Strong		Medium Strong		Weak		Very Weak										217.9	66.8	Granite	Ljunggren, 1985																								Iran	1.76	17.5
250	0.1	100	0.1	50	0.1	25	0.1	5	0.1	1	0.1									205.3	67.7	Granite	Ljunggren, 1985																								North Sea	1.98	14.5
250	1000	100	1000	50	1000	25	1000	5	1000	1	1000									201.3	69.3	Granite	Ljunggren, 1985																								Iran	1.56	14
																				136.447	70.3264	Granite	Stowe, 1969																								North Sea	1.8	13.5
																				226	70.6	Granite	Rahn, 1996																								North Sea	2.15	12
																				153.684	71.0159	Granite	Stowe, 1969																								North Sea	1.9	11
																				234.421	71.7053	Granite	Deere, 1966, Table 4.2																								Iran	1.66	10.4
																				138.86	79.979	Granite	Stowe, 1969																								North Sea	0.9	9.5
																				154.442	81.358	Granite	Brandon, 1974																								North Sea	1.1	9.5
																				65.811	12.466	Granite	Vasconcelos, 2007																								Iran	0.68	9
																				25.86	14.053	Granite	Vasconcelos, 2007
																				60.872	14.053	Granite	Vasconcelos, 2007
																				71.622	16.097	Granite	Vasconcelos, 2007
																				57.458	11.256	Granite	Vasconcelos, 2007
																				59.782	11.471	Granite	Vasconcelos, 2007
																				63.995	11.391	Granite	Vasconcelos, 2007
																				43.148	15.264	Granite	Vasconcelos, 2007
																				25.569	12.144	Granite	Vasconcelos, 2007
																				47.506	12.682	Granite	Vasconcelos, 2007
																				46.053	12.602	Granite	Vasconcelos, 2007
																				69.298	10.073	Granite	Vasconcelos, 2007
																				25.787	18.708	Granite	Vasconcelos, 2007
																				45.981	14.19	Granite	Vasconcelos, 2007
																				37.191	10.774	Granite	Vasconcelos, 2007
																				24.044	15.912	Granite	Vasconcelos, 2007
																				46.852	15.912	Granite	Vasconcelos, 2007
																				34.286	10.937	Granite	Vasconcelos, 2007
																				36.174	11.744	Granite	Vasconcelos, 2007
																				67.918	19.276	Granite	Vasconcelos, 2007
																				64.358	17.716	Granite	Vasconcelos, 2007
																				73.729	20.272	Granite	Vasconcelos, 2007
																				38.136	34.422	Granite	Vasconcelos, 2007
																				46.416	29.284	Granite	Vasconcelos, 2007
																				54.334	18.928	Granite	Vasconcelos, 2007
																				49.467	17.772	Granite	Vasconcelos, 2007
																				56.731	18.229	Granite	Vasconcelos, 2007
																				50.121	32.218	Granite	Vasconcelos, 2007
																				88.765	35.746	Granite	Vasconcelos, 2007
																				90.291	36.043	Granite	Vasconcelos, 2007
																				122.76	33.837	Granite	Vasconcelos, 2007
																				113.971	42.122	Granite	Vasconcelos, 2007
																				119.056	40.186	Granite	Vasconcelos, 2007
																				124.068	39.648	Granite	Vasconcelos, 2007
																				107.361	42.045	Granite	Vasconcelos, 2007
																				115.133	40.888	Granite	Vasconcelos, 2007
																				114.77	38.064	Granite	Vasconcelos, 2007
																				113.39	42.664	Granite	Vasconcelos, 2007
																				166.634	60.126	Granite	Vasconcelos, 2007
																				161.332	59.077	Granite	Vasconcelos, 2007
																				163.366	57.813	Granite	Vasconcelos, 2007
																				161.041	57.894	Granite	Vasconcelos, 2007
																				152.615	60.236	Granite	Vasconcelos, 2007
																				144.77	64.19	Granite	Vasconcelos, 2007
																				147.022	59.913	Granite	Vasconcelos, 2007
																				150.073	67.364	Granite	Vasconcelos, 2007
																				131.695	52.519	Granite	Vasconcelos, 2007
																				132.131	53.515	Granite	Vasconcelos, 2007
																				140.92	51.041	Granite	Vasconcelos, 2007
																				155.521	57.794	Granite	Vasconcelos, 2007
																				152.397	58.682	Granite	Vasconcelos, 2007
																				149.419	63.577	Granite	Vasconcelos, 2007
																				208.503	75.3793	Granite	D'Andrea, 1965,mean of 9 samples from same locality
																				224.49	81.0345	Granite	D'Andrea, 1965,mean of 10 samples from same locality
																				186.345	53.3793	Granite	D'Andrea, 1965,mean of 10 samples from same locality
																				132.09	61.5862	Granite	D'Andrea, 1965,mean of 11 samples from same locality
																				209.386	64.1379	Granite	D'Andrea, 1965,mean of 12 samples from same locality
																				216.655	64.3448	Granite	D'Andrea, 1965,mean of 10 samples from same locality
																				135.931	30.3448	Granite	D'Andrea, 1965,mean of 21 samples from same locality
																				195.862	61.7931	Granite	D'Andrea, 1965,mean of 4 samples from same locality
																				133.793	70.3448	Granite	D'Andrea, 1965,mean of 7 samples from same locality
																				137.1	44	Granite	Ludovico-Marques, 2012
																				67.1	15	Granite	Ludovico-Marques, 2012
																				38.7	8.55	Granite	Ludovico-Marques, 2012
																				5.29	6.25	Carbonate	Madhubabu, 2016
																				5.73	6.52	Carbonate	Madhubabu, 2016
																				5.73	5.46	Carbonate	Madhubabu, 2016
																				6.17	6.44	Carbonate	Madhubabu, 2016
																				6.62	6.06	Carbonate	Madhubabu, 2016
																				8.122	3.055	Carbonate	Chang, 2006
																				10.205	8.182	Carbonate	Chang, 2006
																				11.03	5.56	Carbonate	Madhubabu, 2016
																				11.38	5.23	Carbonate	Madhubabu, 2016
																				11.767	2.145	Carbonate	Chang, 2006
																				11.871	10.733	Carbonate	Chang, 2006
																				12.079	5.227	Carbonate	Chang, 2006
																				14.56	6.78	Carbonate	Madhubabu, 2016
																				15.58	6.5	Carbonate	Madhubabu, 2016
																				16.14	4.493	Carbonate	Chang, 2006
																				18.535	1.285	Carbonate	Chang, 2006
																				19.785	3.381	Carbonate	Chang, 2006
																				23.013	2.017	Carbonate	Chang, 2006
																				25.512	6.588	Carbonate	Chang, 2006
																				26.241	7.523	Carbonate	Chang, 2006
																				28.115	17.929	Carbonate	Chang, 2006
																				28.948	11.033	Carbonate	Chang, 2006
																				29.052	8.634	Carbonate	Chang, 2006
																				29.11	6.89	Carbonate	Madhubabu, 2016
																				33.08	6.68	Carbonate	Madhubabu, 2016
																				34.051	37.832	Carbonate	Chang, 2006
																				34.675	47.961	Carbonate	Chang, 2006
																				35.2483	23.6552	Carbonate	D'Andrea, 1965, mean of 13 samples from same locality
																				35.925	14.366	Carbonate	Chang, 2006
																				36.862	7.193	Carbonate	Chang, 2006
																				38.945	20.049	Carbonate	Chang, 2006
																				42.693	27.298	Carbonate	Chang, 2006
																				42.798	30.758	Carbonate	Chang, 2006
																				44.36	43.943	Carbonate	Chang, 2006
																				46.026	49.525	Carbonate	Chang, 2006
																				46.13	42.048	Carbonate	Chang, 2006
																				46.1948	43.4369	Carbonate	Brandon, 1974
																				46.442	29.09	Carbonate	Chang, 2006
																				46.963	8.328	Carbonate	Chang, 2006
																				48.421	16.107	Carbonate	Chang, 2006
																				50.191	13.101	Carbonate	Chang, 2006
																				50.399	11.686	Carbonate	Chang, 2006
																				50.399	25.781	Carbonate	Chang, 2006
																				50.6	25.7	Carbonate	Han 2009 Table 1
																				50.607	28.433	Carbonate	Chang, 2006
																				51.545	29.115	Carbonate	Chang, 2006
																				51.7106	27.579	Carbonate	Deere, 1966, Table 4.2
																				52.69	26.942	Carbonate	Chang, 2006
																				52.9655	30.2069	Carbonate	D'Andrea, 1965, mean of 13 samples from same locality
																				53.1	26.96	Carbonate	Rahn, 1996
																				54.564	13.201	Carbonate	Chang, 2006
																				54.668	29.114	Carbonate	Chang, 2006
																				54.7793	31.8621	Carbonate	D'Andrea, 1965, mean of 107 samples from same locality
																				55.293	19.314	Carbonate	Chang, 2006
																				55.502	31.691	Carbonate	Chang, 2006
																				57.064	76.651	Carbonate	Chang, 2006
																				59.563	55.08	Carbonate	Chang, 2006
																				60.916	86.198	Carbonate	Chang, 2006
																				62.582	64.576	Carbonate	Chang, 2006
																				62.999	21.459	Carbonate	Chang, 2006
																				63.728	63.819	Carbonate	Chang, 2006
																				63.8	63.8	Carbonate	Rahn, 1996
																				66.123	13.022	Carbonate	Chang, 2006
																				67.06	90.087	Carbonate	Chang, 2006
																				68.31	39.089	Carbonate	Chang, 2006
																				68.726	43.156	Carbonate	Chang, 2006
																				68.83	8.299	Carbonate	Chang, 2006
																				69.663	68.541	Carbonate	Chang, 2006
																				70.705	21.307	Carbonate	Chang, 2006
																				71.434	8.803	Carbonate	Chang, 2006
																				74	71	Carbonate	Palmstrom, 2001
																				74.557	91.753	Carbonate	Chang, 2006
																				74.766	33.986	Carbonate	Chang, 2006
																				74.766	33.279	Carbonate	Chang, 2006
																				75.182	22.089	Carbonate	Chang, 2006
																				75.39	14.991	Carbonate	Chang, 2006
																				75.495	18.679	Carbonate	Chang, 2006
																				76.432	47.701	Carbonate	Chang, 2006
																				76.64	77.557	Carbonate	Chang, 2006
																				79.243	44.846	Carbonate	Chang, 2006
																				80.076	77.077	Carbonate	Chang, 2006
																				80.389	49.721	Carbonate	Chang, 2006
																				80.493	67.503	Carbonate	Chang, 2006
																				80.701	21.507	Carbonate	Chang, 2006
																				81.3517	45.4483	Carbonate	D'Andrea, 1965, mean of 8 samples from same locality
																				82.575	46.892	Carbonate	Chang, 2006
																				82.888	23.502	Carbonate	Chang, 2006
																				84.554	39.996	Carbonate	Chang, 2006
																				84.97	83.997	Carbonate	Chang, 2006
																				86	38	Carbonate	Palmstrom, 2001
																				86.22	30.018	Carbonate	Chang, 2006
																				86.845	44.012	Carbonate	Chang, 2006
																				86.9	43.9	Carbonate	Han 2009 Table 1
																				87.053	22.92	Carbonate	Chang, 2006
																				88.094	36.156	Carbonate	Chang, 2006
																				88.199	36.712	Carbonate	Chang, 2006
																				89.448	19.308	Carbonate	Chang, 2006
																				89.448	41.94	Carbonate	Chang, 2006
																				89.76	37.09	Carbonate	Chang, 2006
																				89.865	11.099	Carbonate	Chang, 2006
																				90	51	Carbonate	Rahn, 1996
																				90.489	54.19	Carbonate	Chang, 2006
																				90.594	82.43	Carbonate	Chang, 2006
																				90.698	33.402	Carbonate	Chang, 2006
																				90.698	51.084	Carbonate	Chang, 2006
																				90.906	23.93	Carbonate	Chang, 2006
																				91.218	30.119	Carbonate	Chang, 2006
																				91.931	39.5172	Carbonate	D'Andrea, 1965, mean of 10 samples from same locality
																				92.3896	44.1264	Carbonate	Deere, 1966, Table 4.2
																				95.8	30.699	Carbonate	Chang, 2006
																				96.008	46.309	Carbonate	Chang, 2006
																				96.217	32.088	Carbonate	Chang, 2006
																				96.5264	51.0211	Carbonate	Deere, 1966, Table 4.2
																				96.529	50.426	Carbonate	Chang, 2006
																				97.0621	55.7931	Carbonate	D'Andrea, 1965, mean of 6 samples from same locality
																				97.154	51.815	Carbonate	Chang, 2006
																				97.883	53.76	Carbonate	Chang, 2006
																				97.883	55.881	Carbonate	Chang, 2006
																				98.82	20.721	Carbonate	Chang, 2006
																				99.132	47.369	Carbonate	Chang, 2006
																				99.9738	57.2264	Carbonate	Deere, 1966, Table 4.2
																				101.631	52.749	Carbonate	Chang, 2006
																				102.36	67.247	Carbonate	Chang, 2006
																				102.777	28.323	Carbonate	Chang, 2006
																				104.026	36.709	Carbonate	Chang, 2006
																				105.5	51.71	Carbonate	Han 2009 Table 1
																				105.692	51.788	Carbonate	Chang, 2006
																				107	47	Carbonate	Palmstrom, 2001
																				107.046	60.654	Carbonate	Chang, 2006
																				107.303	53.6552	Carbonate	D'Andrea, 1965, mean of 9 samples from same locality
																				109.025	24.129	Carbonate	Chang, 2006
																				109.129	37.744	Carbonate	Chang, 2006
																				110	49	Carbonate	Palmstrom, 2001
																				110.17	12.434	Carbonate	Chang, 2006
																				110.274	27.539	Carbonate	Chang, 2006
																				113.086	61.183	Carbonate	Chang, 2006
																				113.117	56.9655	Carbonate	D'Andrea, 1965, mean of 13 samples from same locality
																				113.606	53.883	Carbonate	Chang, 2006
																				114.023	22.941	Carbonate	Chang, 2006
																				114.71	43.0345	Carbonate	D'Andrea, 1965, mean of 9 samples from same locality
																				115.481	55.752	Carbonate	Chang, 2006
																				117.448	41.931	Carbonate	D'Andrea, 1965, mean of 11 samples from same locality
																				117.876	51.786	Carbonate	Chang, 2006
																				118.709	56.737	Carbonate	Chang, 2006
																				119.646	72.044	Carbonate	Chang, 2006
																				119.854	34.458	Carbonate	Chang, 2006
																				119.958	8.972	Carbonate	Chang, 2006
																				122.457	73.912	Carbonate	Chang, 2006
																				127.039	34.937	Carbonate	Chang, 2006
																				128.705	86.187	Carbonate	Chang, 2006
																				129.642	34.431	Carbonate	Chang, 2006
																				129.955	44.737	Carbonate	Chang, 2006
																				130.684	47.616	Carbonate	Chang, 2006
																				131.725	49.561	Carbonate	Chang, 2006
																				133.079	18.972	Carbonate	Chang, 2006
																				133.704	71.031	Carbonate	Chang, 2006
																				134.432	63.276	Carbonate	Chang, 2006
																				134.614	56.4828	Carbonate	D'Andrea, 1965, mean of 5 samples from same locality
																				138.91	58.4	Carbonate	Chang, 2006
																				140.264	61.633	Carbonate	Chang, 2006
																				141.93	54.005	Carbonate	Chang, 2006
																				142.763	70.777	Carbonate	Chang, 2006
																				144.95	55.015	Carbonate	Chang, 2006
																				145.887	38.622	Carbonate	Chang, 2006
																				146.616	68.174	Carbonate	Chang, 2006
																				146.655	87.3793	Carbonate	D'Andrea, 1965, mean of 11 samples from same locality
																				146.72	65.446	Carbonate	Chang, 2006
																				148.49	70.195	Carbonate	Chang, 2006
																				150.989	74.008	Carbonate	Chang, 2006
																				151.718	66.254	Carbonate	Chang, 2006
																				152.814	92.1379	Carbonate	D'Andrea, 1965, mean of 12 samples from same locality
																				153.28	81.409	Carbonate	Chang, 2006
																				153.697	68.097	Carbonate	Chang, 2006
																				155.571	29.577	Carbonate	Chang, 2006
																				155.883	79.388	Carbonate	Chang, 2006
																				157.133	62.161	Carbonate	Chang, 2006
																				157.862	46.248	Carbonate	Chang, 2006
																				158	46.2	Carbonate	Han 2009 Table 2
																				158.579	66.879	Carbonate	Deere, 1966, Table 4.2
																				158.591	65.874	Carbonate	Chang, 2006
																				158.903	45.237	Carbonate	Chang, 2006
																				163.693	66.681	Carbonate	Chang, 2006
																				164.839	52.713	Carbonate	Chang, 2006
																				165.672	72.667	Carbonate	Chang, 2006
																				171.607	45.437	Carbonate	Chang, 2006
																				172.857	61.274	Carbonate	Chang, 2006
																				172.961	30.761	Carbonate	Chang, 2006
																				172.961	27.2	Carbonate	Chang, 2006
																				173	27.17	Carbonate	Han 2009 Table 1
																				173.065	52.989	Carbonate	Chang, 2006
																				175.043	69.559	Carbonate	Chang, 2006
																				178.896	66.199	Carbonate	Chang, 2006
																				179.462	87.1034	Carbonate	D'Andrea, 1965, mean of 15 samples from same locality
																				179.833	59.909	Carbonate	Chang, 2006
																				192.85	63.241	Carbonate	Chang, 2006
																				193	65	Carbonate	Han 2009 Table 2
																				193.058	65.034	Carbonate	Chang, 2006
																				195.765	76.577	Carbonate	Chang, 2006
																				195.869	19.871	Carbonate	Chang, 2006
																				197	55	Carbonate	Han 2009 Table 2
																				197.536	54.88	Carbonate	Chang, 2006
																				197.848	55.511	Carbonate	Chang, 2006
																				197.952	97.289	Carbonate	Chang, 2006
																				203.159	74.379	Carbonate	Chang, 2006
																				204.616	39.092	Carbonate	Chang, 2006
																				209.406	76.373	Carbonate	Chang, 2006
																				211.593	44.799	Carbonate	Chang, 2006
																				213.78	78.065	Carbonate	Chang, 2006
																				245.019	75.155	Carbonate	Chang, 2006
																				245.123	63.712	Carbonate	Chang, 2006
																				255.106	65.5001	Carbonate	Deere, 1966, Table 4.2
																				277.508	58.857	Carbonate	Chang, 2006
																				293.648	77.42	Carbonate	Chang, 2006
																				293.72	77.22	Carbonate	Han 2009 Table 1
																				184.614	39.975	Mudstone	Lama and Vutukuri, 1978
																				170.061	23.44	Mudstone	Lama and Vutukuri, 1978
																				154.877	30.369	Mudstone	Lama and Vutukuri, 1978
																				149.711	35.16	Mudstone	Lama and Vutukuri, 1978
																				149	23.3	Mudstone	Jizba, 1991
																				141.397	53.096	Mudstone	Lama and Vutukuri, 1978
																				140.311	25.528	Mudstone	Lama and Vutukuri, 1978
																				133.829	28.9704	Mudstone	Malkowski, 2018
																				125.82	47.887	Mudstone	Lama and Vutukuri, 1978
																				122.816	26.312	Mudstone	Chang, 2006
																				122.634	16.538	Mudstone	Chang, 2006
																				122.01	13.808	Mudstone	Lama and Vutukuri, 1978
																				121.782	37.977	Mudstone	Chang, 2006
																				118.609	74.791	Mudstone	Lama and Vutukuri, 1978
																				112.988	30.639	Mudstone	Lama and Vutukuri, 1978
																				112.79	37.976	Mudstone	Chang, 2006
																				112.131	13.934	Mudstone	Chang, 2006
																				112.008	24.665	Mudstone	Chang, 2006
																				111.984	22.629	Mudstone	Lama and Vutukuri, 1978
																				111.89	15.774	Mudstone	Lama and Vutukuri, 1978
																				110.3	13.44	Mudstone	Han 2009 Table 1
																				110.111	13.246	Mudstone	Chang, 2006
																				110.111	23.0348	Mudstone	Malkowski, 2018
																				110	25	Mudstone	Jizba, 1991
																				109.87	11.892	Mudstone	Lama and Vutukuri, 1978
																				109.762	18.084	Mudstone	Lama and Vutukuri, 1978
																				109.462	15.307	Mudstone	Lama and Vutukuri, 1978
																				108	13.2	Mudstone	Farrokhrouz, 2014
																				107.623	32.506	Mudstone	Lama and Vutukuri, 1978
																				106.113	25.43	Mudstone	Lama and Vutukuri, 1978
																				100.845	31.081	Mudstone	Lama and Vutukuri, 1978
																				99.54	21.229	Mudstone	Lama and Vutukuri, 1978
																				98	32	Mudstone	Jizba, 1991
																				97	9.2	Mudstone	Farrokhrouz, 2014
																				96.182	40.393	Mudstone	Lama and Vutukuri, 1978
																				94.767	38.624	Mudstone	Lama and Vutukuri, 1978
																				94.501	20.6023	Mudstone	Malkowski, 2018
																				92.981	40.013	Mudstone	Chang, 2006
																				92.926	57.961	Mudstone	Lama and Vutukuri, 1978
																				90.56	25.3933	Mudstone	Malkowski, 2018
																				89.813	34.521	Mudstone	Lama and Vutukuri, 1978
																				89.016	22.113	Mudstone	Lama and Vutukuri, 1978
																				88.193	15.813	Mudstone	Malkowski, 2018
																				87.751	16.6892	Mudstone	Malkowski, 2018
																				87.009	12.4225	Mudstone	Malkowski, 2018
																				83.529	17.271	Mudstone	Chang, 2006
																				83.5	11.2	Mudstone	Farrokhrouz, 2014
																				83.158	12.506	Mudstone	Lama and Vutukuri, 1978
																				83.132	13.686	Mudstone	Chang, 2006
																				82.349	23.1076	Mudstone	Malkowski, 2018
																				82.204	54.668	Mudstone	Lama and Vutukuri, 1978
																				81.918	11.7861	Mudstone	Malkowski, 2018
																				80.711	30.442	Mudstone	Lama and Vutukuri, 1978
																				80.337	46.421	Mudstone	Chang, 2006
																				79.053	26.6354	Mudstone	Malkowski, 2018
																				78	10.3	Mudstone	Farrokhrouz, 2014
																				78	12.15	Mudstone	Farrokhrouz, 2014
																				78	14	Mudstone	Jizba, 1991
																				78	15.8	Mudstone	Jizba, 1991
																				77.309	12.1972	Mudstone	Horsrud, 2001
																				75.256	11.008	Mudstone	Chang, 2006
																				75.2	11.1	Mudstone	Han 2009 Table 1
																				73.665	17.5108	Mudstone	Malkowski, 2018
																				73.27	43.449	Mudstone	Chang, 2006
																				72.785	15.1784	Mudstone	Malkowski, 2018
																				72.5	5.48	Mudstone	Farrokhrouz, 2014
																				71.769	36.474	Mudstone	Chang, 2006
																				69.5	6.65	Mudstone	Farrokhrouz, 2014
																				69.49	18.6493	Mudstone	Malkowski, 2018
																				69.297	11.278	Mudstone	Lama and Vutukuri, 1978
																				67.454	17.728	Mudstone	Malkowski, 2018
																				66.948	14.9176	Mudstone	Malkowski, 2018
																				66.858	21.892	Mudstone	Lama and Vutukuri, 1978
																				66.765	13.464	Mudstone	Lama and Vutukuri, 1978
																				66.639	18.1491	Mudstone	Malkowski, 2018
																				64.5	8.9	Mudstone	Farrokhrouz, 2014
																				64.434	17.4668	Mudstone	Malkowski, 2018
																				64	23.8	Mudstone	Jizba, 1991
																				63.483	18.2065	Mudstone	Malkowski, 2018
																				63.4	3.35	Mudstone	Farrokhrouz, 2014
																				63.351	14.2127	Mudstone	Malkowski, 2018
																				63.2	6.7	Mudstone	Farrokhrouz, 2014
																				61.413	17.6721	Mudstone	Malkowski, 2018
																				61.145	14.031	Mudstone	Malkowski, 2018
																				60.801	19.0034	Mudstone	Malkowski, 2018
																				60.16	15.2601	Mudstone	Malkowski, 2018
																				60.093	13.9288	Mudstone	Malkowski, 2018
																				59.412	16.0339	Mudstone	Malkowski, 2018
																				59.38	13.022	Mudstone	Lama and Vutukuri, 1978
																				58.977	11.13	Mudstone	Lama and Vutukuri, 1978
																				58.5	7.9	Mudstone	Farrokhrouz, 2014
																				58.169	9.902	Mudstone	Lama and Vutukuri, 1978
																				58	3.25	Mudstone	Farrokhrouz, 2014
																				57.744	21.5072	Mudstone	Malkowski, 2018
																				57.5	5.95	Mudstone	Farrokhrouz, 2014
																				57.477	16.4097	Mudstone	Malkowski, 2018
																				57.449	10.4247	Mudstone	Malkowski, 2018
																				56.226	11.6082	Mudstone	Malkowski, 2018
																				56.192	63.784	Mudstone	Lama and Vutukuri, 1978
																				55.4	4.85	Mudstone	Farrokhrouz, 2014
																				55.235	8.943	Mudstone	Lama and Vutukuri, 1978
																				54.969	13.2583	Mudstone	Malkowski, 2018
																				54.5	4.35	Mudstone	Farrokhrouz, 2014
																				54.117	17.3205	Mudstone	Malkowski, 2018
																				54	6.2	Mudstone	Farrokhrouz, 2014
																				53.938	9.68	Mudstone	Chang, 2006
																				53.854	7.7399	Mudstone	Malkowski, 2018
																				53.809	19.5394	Mudstone	Malkowski, 2018
																				53.5	5.74	Mudstone	Farrokhrouz, 2014
																				52.9	2.96	Mudstone	Farrokhrouz, 2014
																				52.507	5.823	Mudstone	Lama and Vutukuri, 1978
																				52.3	2.54	Mudstone	Farrokhrouz, 2014
																				52.083	14.4876	Mudstone	Malkowski, 2018
																				51.778	13.8505	Mudstone	Malkowski, 2018
																				50.728	11.4157	Mudstone	Malkowski, 2018
																				50.02	7.2968	Mudstone	Malkowski, 2018
																				48.559	7.371	Mudstone	Lama and Vutukuri, 1978
																				48.5	4.9	Mudstone	Farrokhrouz, 2014
																				48.315	15.6488	Mudstone	Malkowski, 2018
																				48.186	8.4805	Mudstone	Malkowski, 2018
																				48.054	6.757	Mudstone	Lama and Vutukuri, 1978
																				47.8	4.84	Mudstone	Farrokhrouz, 2014
																				47.298	14.3974	Mudstone	Malkowski, 2018
																				47.262	15.888	Mudstone	Malkowski, 2018
																				47	4.1	Mudstone	Farrokhrouz, 2014
																				46	3.6	Mudstone	Farrokhrouz, 2014
																				46	6.6	Mudstone	Farrokhrouz, 2014
																				45.94	14.8072	Mudstone	Malkowski, 2018
																				45.906	14.0335	Mudstone	Malkowski, 2018
																				45.738	12.4405	Mudstone	Malkowski, 2018
																				45	4.28	Mudstone	Farrokhrouz, 2014
																				45	6.8	Mudstone	Farrokhrouz, 2014
																				43.599	13.9656	Mudstone	Malkowski, 2018
																				43.47	6.8314	Mudstone	Malkowski, 2018
																				42.996	5.135	Mudstone	Lama and Vutukuri, 1978
																				42.582	11.8152	Mudstone	Malkowski, 2018
																				42.424	7.199	Mudstone	Chang, 2006
																				42.412	12.3842	Mudstone	Malkowski, 2018
																				41.639	5.159	Mudstone	Malkowski, 2018
																				40.5	3.8	Mudstone	Farrokhrouz, 2014
																				39.792	19.0865	Mudstone	Malkowski, 2018
																				39.629	12.3391	Mudstone	Malkowski, 2018
																				39.628	13.3518	Mudstone	Malkowski, 2018
																				39.5	4.17	Mudstone	Farrokhrouz, 2014
																				39.494	11.7702	Mudstone	Malkowski, 2018
																				39	3.85	Mudstone	Farrokhrouz, 2014
																				38.241	9.0965	Mudstone	Malkowski, 2018
																				38	3.75	Mudstone	Farrokhrouz, 2014
																				38	3.95	Mudstone	Farrokhrouz, 2014
																				37.98	6.167	Mudstone	Chang, 2006
																				37.762	13.1701	Mudstone	Malkowski, 2018
																				36.394	30.983	Mudstone	Lama and Vutukuri, 1978
																				36.04	15.966	Mudstone	Chang, 2006
																				35.896	12.6242	Mudstone	Malkowski, 2018
																				35.401	12.457	Mudstone	Lama and Vutukuri, 1978
																				34	4.62	Mudstone	Farrokhrouz, 2014
																				33.856	38.722	Mudstone	Lama and Vutukuri, 1978
																				33.789	5.405	Mudstone	Lama and Vutukuri, 1978
																				33.7	3.45	Mudstone	Farrokhrouz, 2014
																				33.62	14.3086	Mudstone	Malkowski, 2018
																				33.483	7.494	Mudstone	Lama and Vutukuri, 1978
																				32.576	6.4918	Mudstone	Malkowski, 2018
																				32.536	12.0672	Mudstone	Malkowski, 2018
																				32.5	6.16	Mudstone	Farrokhrouz, 2014
																				32	2.95	Mudstone	Farrokhrouz, 2014
																				31.5	3.72	Mudstone	Farrokhrouz, 2014
																				30.635	12.7957	Mudstone	Malkowski, 2018
																				29.759	6.0485	Mudstone	Malkowski, 2018
																				29	3	Mudstone	Farrokhrouz, 2014
																				28.597	13.9567	Mudstone	Malkowski, 2018
																				27.995	5.4685	Mudstone	Malkowski, 2018
																				27.581	12.068	Mudstone	Malkowski, 2018
																				27.5	3.9	Mudstone	Farrokhrouz, 2014
																				27.3	4.7	Mudstone	Farrokhrouz, 2014
																				27.11	8.1425	Mudstone	Malkowski, 2018
																				26.957	3.8265	Mudstone	Horsrud, 2001
																				26	3.1	Mudstone	Farrokhrouz, 2014
																				25.952	11.909	Mudstone	Malkowski, 2018
																				25.006	7.4033	Mudstone	Malkowski, 2018
																				24.5	2.9	Mudstone	Farrokhrouz, 2014
																				23.921	12.919	Mudstone	Chang, 2006
																				23.5	2.53	Mudstone	Farrokhrouz, 2014
																				23.42	10.955	Mudstone	Chang, 2006
																				23	4.63	Mudstone	Farrokhrouz, 2014
																				22.383	2.4193	Mudstone	Horsrud, 2001
																				22.361	4.8663	Mudstone	Malkowski, 2018
																				20.528	5.2649	Mudstone	Malkowski, 2018
																				20	1.9	Mudstone	Farrokhrouz, 2014
																				19.852	2.8869	Mudstone	Malkowski, 2018
																				19.5	3.25	Mudstone	Farrokhrouz, 2014
																				19.474	7.2335	Mudstone	Malkowski, 2018
																				19.442	5.6405	Mudstone	Malkowski, 2018
																				19.3	1.6	Mudstone	Farrokhrouz, 2014
																				18.514	2.039	Mudstone	Lama and Vutukuri, 1978
																				18.5	2.45	Mudstone	Farrokhrouz, 2014
																				17.95	3.6154	Mudstone	Malkowski, 2018
																				17.5	1.76	Mudstone	Farrokhrouz, 2014
																				17.171	2.8077	Mudstone	Malkowski, 2018
																				16.854	10.046	Mudstone	Chang, 2006
																				15.644	1.909	Mudstone	Malkowski, 2018
																				15.608	3.9572	Mudstone	Malkowski, 2018
																				15.253	2.383	Mudstone	Chang, 2006
																				14.861	4.4465	Mudstone	Malkowski, 2018
																				14.5	1.98	Mudstone	Farrokhrouz, 2014
																				14	1.56	Mudstone	Farrokhrouz, 2014
																				13.5	1.8	Mudstone	Farrokhrouz, 2014
																				13.152	1.671	Mudstone	Lama and Vutukuri, 1978
																				12.929	2.0175	Mudstone	Horsrud, 2001
																				12.841	1.9161	Mudstone	Horsrud, 2001
																				12.269	1.637	Mudstone	Horsrud, 2001
																				12	2.15	Mudstone	Farrokhrouz, 2014
																				11.202	6.828	Mudstone	Chang, 2006
																				11.011	1.573	Mudstone	Chang, 2006
																				11	1	Mudstone	Palmstrom, 2001
																				11	1.9	Mudstone	Farrokhrouz, 2014
																				10.4	1.66	Mudstone	Farrokhrouz, 2014
																				9.5	0.9	Mudstone	Farrokhrouz, 2014
																				9.5	1.1	Mudstone	Farrokhrouz, 2014
																				9.194	0.639	Mudstone	Chang, 2006
																				9	0.68	Mudstone	Farrokhrouz, 2014
																				8.27	2.83	Mudstone	Han 2009 Table 1
																				8.27	2.83	Mudstone	Han 2009 Table 1
																				8.223	1.0114	Mudstone	Horsrud, 2001
																				8.004	1.1236	Mudstone	Horsrud, 2001
																				7.962	10.34	Mudstone	Chang, 2006
																				7.94	21.268	Mudstone	Chang, 2006
																				7.268	3.39	Mudstone	Chang, 2006
																				6.877	3.464	Mudstone	Lama and Vutukuri, 1978
																				6.765	2.211	Mudstone	Chang, 2006
																				6.025	0.8156	Mudstone	Horsrud, 2001
																				5.697	30.87	Mudstone	Chang, 2006
																				5	2	Mudstone	Palmstrom, 2001
																				4.747	1.056	Mudstone	Chang, 2006
																				1.86158	0.206842	Mudstone	Han 2009 Table 1
																				1.803	0.2572	Mudstone	Horsrud, 2001
																				1.539	0.1232	Mudstone	Horsrud, 2001
																				1.41	0.55	Mudstone	Han 2009 Table 1
																				1.41	0.55	Mudstone	Han 2009 Table 1
																				1.275	0.3408	Mudstone	Horsrud, 2001
																				16.566	2.2042	Sandstone	Malkowski, 2018
																				16.9034	2.62069	Sandstone	D'Andrea, 1965,mean of 13 samples from same locality
																				18.7	2.64	Sandstone	Ludovico-Marques, 2012
																				46.1948	3.17158	Sandstone	Brandon, 1974
																				16.346	3.8885	Sandstone	Malkowski, 2018
																				23.4966	3.93103	Sandstone	D'Andrea, 1965,mean of 7 samples from same locality
																				30.424	4.3391	Sandstone	Malkowski, 2018
																				24.034	4.6502	Sandstone	Malkowski, 2018
																				34.701	4.7662	Sandstone	Malkowski, 2018
																				30.911	4.789	Sandstone	Malkowski, 2018
																				24.4763	4.82632	Sandstone	Brandon, 1974
																				55.158	4.82632	Sandstone	Brandon, 1974
																				26.036	5.4117	Sandstone	Malkowski, 2018
																				29.8897	5.58621	Sandstone	D'Andrea, 1965,mean of 8 samples from same locality
																				37.786	5.9199	Sandstone	Malkowski, 2018
																				71.71	6	Sandstone	Han 2009 Table 1
																				34.699	6.0236	Sandstone	Malkowski, 2018
																				46.502	6.4395	Sandstone	Malkowski, 2018
																				31.991	6.4733	Sandstone	Malkowski, 2018
																				41.196	6.4738	Sandstone	Malkowski, 2018
																				34.698	6.6119	Sandstone	Malkowski, 2018
																				55.15	6.7	Sandstone	Han 2009 Table 1
																				10.6207	6.75862	Sandstone	D'Andrea, 1965,mean of 5 samples from same locality
																				50.834	6.8089	Sandstone	Malkowski, 2018
																				78.6001	6.89474	Sandstone	Brandon, 1974
																				40.8621	6.89655	Sandstone	D'Andrea, 1965,mean of 14 samples from same locality
																				66.9	6.9	Sandstone	Han 2009 Table 2
																				37.3	7.19	Sandstone	Han 2009 Table 2
																				46.013	7.7892	Sandstone	Malkowski, 2018
																				37.025	7.8002	Sandstone	Malkowski, 2018
																				47.15	7.9507	Sandstone	Malkowski, 2018
																				86.9	8.27	Sandstone	Han 2009 Table 1
																				41.409	8.4926	Sandstone	Malkowski, 2018
																				34.966	8.5269	Sandstone	Malkowski, 2018
																				44.983	8.5966	Sandstone	Malkowski, 2018
																				33.883	8.6653	Sandstone	Malkowski, 2018
																				50.885	8.7008	Sandstone	Malkowski, 2018
																				53.09	8.8	Sandstone	Han 2009 Table 1
																				59.331	8.9435	Sandstone	Malkowski, 2018
																				42.654	9.081	Sandstone	Malkowski, 2018
																				51.534	9.2199	Sandstone	Malkowski, 2018
																				50.505	9.4852	Sandstone	Malkowski, 2018
																				73.7738	9.65264	Sandstone	Brandon, 1974
																				39.512	9.7845	Sandstone	Malkowski, 2018
																				49.15	9.8658	Sandstone	Malkowski, 2018
																				52.237	10.0275	Sandstone	Malkowski, 2018
																				37.454	10.3151	Sandstone	Malkowski, 2018
																				38.9	10.52	Sandstone	Rahn, 1996
																				78.6	10.69	Sandstone	Han 2009 Table 1
																				48.987	10.7079	Sandstone	Malkowski, 2018
																				50.719	10.9041	Sandstone	Malkowski, 2018
																				32.82	11.03	Sandstone	Han 2009 Table 1
																				55.9	11.2	Sandstone	Han 2009 Table 2
																				52.18	11.5387	Sandstone	Malkowski, 2018
																				55.05	11.5734	Sandstone	Malkowski, 2018
																				61.602	11.5738	Sandstone	Malkowski, 2018
																				66.474	11.7932	Sandstone	Malkowski, 2018
																				58.731	12.2081	Sandstone	Malkowski, 2018
																				66.907	12.2085	Sandstone	Malkowski, 2018
																				51.203	12.9114	Sandstone	Malkowski, 2018
																				48.117	13.015	Sandstone	Malkowski, 2018
																				60.408	13.1887	Sandstone	Malkowski, 2018
																				47.467	13.1996	Sandstone	Malkowski, 2018
																				54.668	13.3153	Sandstone	Malkowski, 2018
																				43.134	13.7531	Sandstone	Malkowski, 2018
																				73.781	13.9969	Sandstone	Malkowski, 2018
																				59.865	14.0424	Sandstone	Malkowski, 2018
																				96.739	14.0789	Sandstone	Malkowski, 2018
																				47.682	14.0994	Sandstone	Malkowski, 2018
																				57.807	14.3076	Sandstone	Malkowski, 2018
																				54.504	14.3882	Sandstone	Malkowski, 2018
																				46.1948	14.479	Sandstone	Deere, 1966, Table 4.2
																				52.554	14.6649	Sandstone	Malkowski, 2018
																				56.344	14.8382	Sandstone	Malkowski, 2018
																				125	15	Sandstone	Jizba, 1991
																				86.558	15.2781	Sandstone	Malkowski, 2018
																				81.63	15.6355	Sandstone	Malkowski, 2018
																				68.147	15.6809	Sandstone	Malkowski, 2018
																				45.134	15.7143	Sandstone	Malkowski, 2018
																				76.81	15.7506	Sandstone	Malkowski, 2018
																				61.215	16.1766	Sandstone	Malkowski, 2018
																				111.518	16.2715	Sandstone	Malkowski, 2018
																				56.342	16.4647	Sandstone	Malkowski, 2018
																				46.053	16.718	Sandstone	Malkowski, 2018
																				105.3	17	Sandstone	Ludovico-Marques, 2012
																				66.412	17.1574	Sandstone	Malkowski, 2018
																				113.074	17.2369	Sandstone	Brandon, 1974
																				124	17.5	Sandstone	Han 2009 Table 2
																				74.263	17.527	Sandstone	Malkowski, 2018
																				47.622	17.8947	Sandstone	Malkowski, 2018
																				88.177	18.6928	Sandstone	Malkowski, 2018
																				75.8422	18.9605	Sandstone	Deere, 1966, Table 4.2
																				61.157	19.0144	Sandstone	Malkowski, 2018
																				108.644	19.3168	Sandstone	Malkowski, 2018
																				69.818	20.3646	Sandstone	Malkowski, 2018
																				101.223	20.5162	Sandstone	Malkowski, 2018
																				83.788	20.5383	Sandstone	Malkowski, 2018
																				109.453	21.128	Sandstone	Malkowski, 2018
																				82.379	21.1843	Sandstone	Malkowski, 2018
																				107	21.37	Sandstone	Rahn, 1996
																				106.095	21.7969	Sandstone	Malkowski, 2018
																				64.401	22.0139	Sandstone	Malkowski, 2018
																				104.145	22.1775	Sandstone	Malkowski, 2018
																				97.214	22.304	Sandstone	Malkowski, 2018
																				119.684	22.8474	Sandstone	Malkowski, 2019
																				105.442	23.7811	Sandstone	Malkowski, 2018
																				99	23.8	Sandstone	Jizba, 1991
																				127.858	24.0245	Sandstone	Malkowski, 2020
																				148.237	25.5106	Sandstone	Brandon, 1974
																				136.2	26	Sandstone	Ludovico-Marques, 2012
																				90.32	27.58	Sandstone	Han 2009 Table 1
																				109	28	Sandstone	Palmstrom, 2001
																				147	28	Sandstone	Palmstrom, 2001
																				90.3212	28.9579	Sandstone	Brandon, 1974
																				31.7158	36.5421	Sandstone	Brandon, 1974
																				2.567	0.28827	Japan Diatomite	Yamamoto, 2007
																				2.6626	0.389493	Japan Diatomite	Yamamoto, 2007
																				4.8948	0.362827	Japan Diatomite	Yamamoto, 2007
																				5.0383	0.678578	Japan Diatomite	Yamamoto, 2007
																				3.04748	0.535629	Belridge Diatomite	Fossum and Fredrich, 2000 D1
																				3.1016	0.849814	Belridge Diatomite	Fossum and Fredrich, 2000 D3
																				2.37614	0.998362	Belridge Diatomite	Fossum and Fredrich, 2000 D2
																				3.35154	0.328875	Belridge Diatomite	Fredrich, 2000, Diatomite G
																				2.71929	0.413684	Belridge Diatomite	Fredrich, 2000, Diatomite J
																				4.04446	0.493658	Belridge Diatomite	Fredrich, 2000, Diatomite K
																				8.51501	0.774968	Belridge Diatomite	Fredrich, 2000, Diatomite L
																				24.8211	4.96422	Tuff	Deere, 1966, Table 4.2
																				15.8579	1.86158	Tuff	Brandon, 1974
																				11.3	3.65	Tuff	Rahn, 1996
																				10.7558	2.96474	Tuff	Stowe, 1969
																				11.5142	5.30895	Tuff	Stowe, 1969
																				11.5832	2.7579	Tuff	Stowe, 1969
																				9.23	5.58	Tuff	Heap, 2014
																				14.84	4.35	Tuff	Li, 1993
																				15.83	4.64	Tuff	Li, 1993
																				17.55	3.4	Tuff	Li, 1993
																				18.63	5.56	Tuff	Li, 1993
																				20.29	5.29	Tuff	Li, 1993
																				21.76	5.26	Tuff	Li, 1993
																				21.83	6.44	Tuff	Li, 1993
																				22.4	5.25	Tuff	Li, 1993
																				22.73	5.44	Tuff	Li, 1993
																				22.9	4.16	Tuff	Li, 1993
																				22.93	5.31	Tuff	Li, 1993
																				23.27	4.57	Tuff	Li, 1993
																				25.34	6.11	Tuff	Li, 1993
																				26.15	5.54	Tuff	Li, 1993
																				26.6	3.97	Tuff	Li, 1993
																				27.39	5.12	Tuff	Li, 1993
																				27.82	6.1	Tuff	Li, 1993
																				28.73	4.71	Tuff	Li, 1993
																				28.85	5.93	Tuff	Li, 1993
																				28.92	5.2	Tuff	Li, 1993
																				30.03	8.44	Tuff	Li, 1993
																				30.25	5.28	Tuff	Li, 1993
																				30.94	9.63	Tuff	Li, 1993
																				31.18	5.69	Tuff	Li, 1993
																				31.75	5.04	Tuff	Li, 1993
																				32.02	6.66	Tuff	Li, 1993
																				32.26	8.49	Tuff	Li, 1993
																				1.344	0.417203	Chalk	Lake, 1975
																				1.92	0.467267	Chalk	Lake, 1975
																				1.728	0.483955	Chalk	Lake, 1975
																				4.32	0.650836	Chalk	Lake, 1975
																				4.608	0.7009	Chalk	Lake, 1975
																				2.688	0.909501	Chalk	Lake, 1975
																				3.168	0.98126	Chalk	Lake, 1975
																				5.76	1.04301	Chalk	Lake, 1975
																				6.528	1.3267	Chalk	Lake, 1975
																				6.336	1.41014	Chalk	Lake, 1975
																				4.032	1.46855	Chalk	Lake, 1975
[truncated: 2 more columns]

## Sheet: 7) Chert_Silica_Box_Plots
Table 2 of Behl and Garrison 1994								norm	norm	norm	norm		Table 2 of Behl and Garrison 1994											Isaacs, 1980								Dunham 1987
Sample	Si Phase	Lith	Detritus	Silica	Dolomite	Calcite	Total	det	Si	BioCarb	Total		Lith	Detritus	Silica	Dolomite	Calcite	Total	det	Si	BioCarb			CT Chert				Qtz Chert													Aliyu, 2016								Aliyu, 2016
MUS-3d	CT	siliceous dolomite	0.3	41.7	55.3	2.6	99.9	0.3003	41.7417	57.958	100		black chert nodule surrounding spheroid	3.2	90.1	0.8	5.7	99.8	3.20641	90.2806	6.51303			norm	Norm	Norm		norm	Norm	Norm		BIO.SI.	DOLO.	DETRIT.	Point #		X	Y	Lith		LG Flint		LBG Flint		BG Flint		GF/DBG Flint		All Classes
MUS-1d	A	clayey diatomite	40.2	56.5	2.1	0.7	99.5	40.402	56.7839	2.81407	100		brown and black chert bed	8.7	90.7	0.4	0.3	100.1	8.69131	90.6094	0.699301			sil	Biocarb	Det		sil	Biocarb	Det		96.5	0	3.5	6		1.75	3.03109	Chert		Calcite	Quartz	Calcite	Quartz	Calcite	Quartz	Calcite	Quartz	Calcite
JMEC-d	A	diatomite	20.1	79.6	0.2	0.3	100.2	20.0599	79.4411	0.499002	100		brown chert nodule in opal-A diatomite	5.6	93.6	0.3	0.2	99.7	5.61685	93.8816	0.501505			0.989899	0	0.010101		0.88	0.04	0.08		94.9	3.8	1.3	2		4.45	1.12583	Chert		23.99	76.01	13.21	86.09	1.96	97.84	1.91	98.09	0.1321
MUS-1p	CT	dark brown cherty porcelanite nodule	17	80.7	2.1	0	99.8	17.0341	80.8617	2.10421	100		glassy black chert lamination in opal-A diatomite	0.8	94.2	2	2.9	99.9	0.800801	94.2943	4.9049			0.917526	0	0.0824742		0.92	0.04	0.04		94	0	6	4		3	5.19615	Chert		7.16	92.84			3.2	96.81	1.14	98.86	0.0716
G90-1-Fd	A	diatomite	16.1	83.5	0.2	0	99.8	16.1323	83.6673	0.200401	100		porcelanite host	2	95.6	3.5	0	101.1	1.97824	94.5598	3.46192			0.94898	0	0.0510204		0.86	0.09	0.05		92.4	6.4	1.2	1		7	1.03923	Chert				1.98	98.02	0.84	99.16	0.77	99.23	0.0626
G91-3d	A	diatomite	11.5	83.7	0.8	3.5	99.5	11.5578	84.1206	4.32161	100		black chert spheroid in opal-A diatomite	3	94.4	0.7	1.7	99.8	3.00601	94.5892	2.40481			0.969388	0	0.0306122		0.969419	0	0.030581		91.5	4.5	4	5		6.5	3.4641	Chert				0.89	99.11	0.92	99.08	0.5	99.5	0.0887667
G91-3c	CT	black chert nodule surrounding spheroid	3.2	90.1	0.8	5.7	99.8	3.20641	90.2806	6.51303	100		black chert lamination, dolomite-replacement	0.2	96.7	2.7	0.4	100	0.2	96.7	3.1			0.959184	0	0.0408163		0.97	0	0.03		91	0.5	8.5	7		4.75	7.36122	Chert				6.26	93.74			1.21	98.79	0.0347
JMEC-c	CT	brown and black chert bed	8.7	90.7	0.4	0.3	100.1	8.69131	90.6094	0.699301	100		glassy black chert lamination in opal-A diatomite	0.4	97.9	0.5	1.2	100	0.4	97.9	1.7			0.949495	0	0.0505051		0.924	0.064	0.012		87.1	9.4	3.5	8		11.15	3.03109	Chert				2.22	97.78			1.46	98.54	0.032
G90-1-Fc	CT	brown chert nodule in opal-A diatomite	5.6	93.6	0.3	0.2	99.7	5.61685	93.8816	0.501505	100		black chert, dolomite replacement	0.7	98.6	0.5	0.2	100	0.7	98.6	0.7			0.757576	0.161616	0.0808081		0.949	0.038	0.013		86.3	10.7	3	9		12.2	2.59808	Chert				3.47	96.53			1.34	98.66	0.0222
CT-BC1	CT	glassy black chert lamination in opal-A diatomite	0.8	94.2	2	2.9	99.9	0.800801	94.2943	4.9049	100		black chert in opal-CT porcelanite	0.6	98.8	0.2	0.3	99.9	0.600601	98.8989	0.500501			0.831522	0.00217391	0.166304		0.94	0	0.06		83.8	15.7	0.5	13		15.95	0.433013	Chert		15.575	84.425	4.67167	95.2117	1.73	98.2225	1.19	98.81	0.0196
NS-3p	CT	porcelanite host	2	95.6	3.5	0	101.1	1.97824	94.5598	3.46192	100		black chert lamination in opal-CT chert	0.2	98.9	0.6	0.3	100	0.2	98.9	0.9			0.85	0	0.15		0.915	0.045	0.04		83.3	15.3	1.4	14		16	1.21244	Chert										0.0198
G91-3b	CT	black chert spheroid in opal-A diatomite	3	94.4	0.7	1.7	99.8	3.00601	94.5892	2.40481	100		black chert lamination in opal-CT porcelanite	0.3	99	0.4	0.2	99.9	0.3003	99.0991	0.600601			0.87	0	0.13		0.965	0	0.035		80.8	18.8	0.4	15		19	0.34641	Chert										0.0191
MUS-3c	Q	black chert lamination, dolomite-replacement	0.2	96.7	2.7	0.4	100	0.2	96.7	3.1	100		black chert in opal-CT porcelanite	0.3	99.1	0.3	0.3	100	0.3	99.1	0.6			0.909091	0	0.0909091		0.91	0.005	0.085		80	15	5	16		17.5	4.33013	Chert										0.0337381
CT-BC-2	CT	glassy black chert lamination in opal-A diatomite	0.4	97.9	0.5	1.2	100	0.4	97.9	1.7	100		black chert, breccia fragment	0.1	99.2	0.4	0.2	99.9	0.1001	99.2993	0.600601			0.909091	0	0.0909091		0.871	0.094	0.035		75.3	23.4	1.3	28		24.05	1.12583	Chert										0.0146
LH90-06	Q	black chert, dolomite replacement	0.7	98.6	0.5	0.2	100	0.7	98.6	0.7	100													0.87	0	0.13		0.863	0.107	0.03		75.05	20.7	4.25	27		22.825	3.68061	Chert										0.0134
NS	Q	black chert in opal-CT porcelanite	0.6	98.8	0.2	0.3	99.9	0.600601	98.8989	0.500501	100													0.920792	0.039604	0.039604		0.992993	0.00600601	0.001001		74.4	24.8	0.8	29		25.2	0.69282	Chert										0.0121
MS90-25	Q	black chert lamination in opal-CT chert	0.2	98.9	0.6	0.3	100	0.2	98.9	0.9	100													0.92	0	0.08		0.986	0.007	0.007		69.5	29.6	0.9	30		30.05	0.779423	Chert										0.0189054
MUS90-33	Q	black chert lamination in opal-CT porcelanite	0.3	99	0.4	0.2	99.9	0.3003	99.0991	0.600601	100													0.89	0	0.11		0.989	0.009	0.002		67.8	30	2.2	31		31.1	1.90526	Chert										0.0114
NS-3c	Q	black chert in opal-CT porcelanite	0.3	99.1	0.3	0.3	100	0.3	99.1	0.6	100													0.87	0	0.13		0.967	0.031	0.002		71.6	2.5	25.9	23		15.45	22.4301	Clay Shale										0.0092
HWY1-100	Q	black chert, breccia fragment	0.1	99.2	0.4	0.2	99.9	0.1001	99.2993	0.600601	100													0.9	0	0.1		0.990991	0.00600601	0.003003		64.4	8.9	26.7	38		22.25	23.1229	Clay Shale										0.0089
																								0.9	0.06	0.04		0.988989	0.00500501	0.00600601		62	0	38	40		19	32.909	Clay Shale										0.0084
																								0.88	0.05	0.07		0.991	0.006	0.003		61.7	9	29.3	39		23.65	25.3745	Clay Shale										0.0077
																								0.88	0	0.12						50	3.6	46.4	41		26.8	40.1836	Clay Shale										0.005
																								0.949495	0	0.0505051						46	0	54	63		27	46.7654	Clay Shale
																								0.942943	0.049049	0.00800801						45.35	11.1	43.55	62		32.875	37.7154	Clay Shale
																								0.979	0.017	0.004						42	0	58	64		29	50.2295	Clay Shale
																								0.938816	0.00501505	0.0561685						41.5	1	57.5	65		29.75	49.7965	Clay Shale
																								0.945892	0.0240481	0.0300601						39	1	60	66		31	51.9615	Clay Shale
																								0.902806	0.0651303	0.0320641						38.3	26.5	35.2	61		44.1	30.4841	Clay Shale
																								0.906094	0.00699301	0.0869131						27.9	2.6	69.5	67		37.35	60.1888	Clay Shale
																								0.945598	0.0346192	0.0197824						3.5	96.5	0	84		96.5	0	Dolo.Cmt.
																																2.5	97.5	0	85		97.5	0	Dolo.Cmt.
																																1.5	98.5	0	86		98.5	0	Dolo.Cmt.
																																29.1	56.3	14.6	68		63.6	12.644	Dolo.Mudstone
																																24.1	65.9	10	69		70.9	8.66025	Dolo.Mudstone
																																23.6	73.1	3.3	74		74.75	2.85788	Dolo.Mudstone
																																20.2	59.3	20.5	70		69.55	17.7535	Dolo.Mudstone
																																19.5	73	7.5	73		76.75	6.49519	Dolo.Mudstone
																																18.6	70.1	11.3	71		75.75	9.78609	Dolo.Mudstone
																																11.1	73.2	15.7	72		81.05	13.5966	Dolo.Mudstone
																																56.2	26.1	17.7	43		34.95	15.3286	Dolo.Sil.Shale
																																55	33.4	11.6	45		39.2	10.0459	Dolo.Sil.Shale
																																54.2	31.6	14.2	44		38.7	12.2976	Dolo.Sil.Shale
																																54.1	34	11.9	46		39.95	10.3057	Dolo.Sil.Shale
																																47.6	37	15.4	56		44.7	13.3368	Dolo.Sil.Shale
																																40.7	34.1	25.2	60		46.7	21.8238	Dolo.Sil.Shale
																																39.44	45.9	14.66	55		53.23	12.6959	Dolo.Sil.Shale
																																34.1	41.6	24.3	59		53.75	21.0444	Dolo.Sil.Shale
																																32.6	48.7	18.7	57		58.05	16.1947	Dolo.Sil.Shale
																																29.2	50.6	20.2	58		60.7	17.4937	Dolo.Sil.Shale
																																10	78	12	76		84	10.3923	Dolomite
																																9.8	82	8.2	77		86.1	7.10141	Dolomite
																																9.7	77.8	12.5	75		84.05	10.8253	Dolomite
																																9.4	87	3.6	79		88.8	3.11769	Dolomite
																																9.3	82.1	8.6	78		86.4	7.44782	Dolomite
																																3.5	95.5	1	83		96	0.866025	Dolomite
																																2	86	12	80		92	10.3923	Dolomite
																																1.4	90.8	7.8	81		94.7	6.755	Dolomite
																																1	92.6	6.4	82		95.8	5.54256	Dolomite
																																67.3	31.7	1	33		32.2	0.866025	Lam.Ch.Dol.
																																65.9	30.5	3.6	32		32.3	3.11769	Lam.Ch.Dol.
																																57.9	37.5	4.6	47		39.8	3.98372	Lam.Ch.Dol.
																																56.15	41.75	2.1	48		42.8	1.81865	Lam.Ch.Dol.
																																52.5	45.6	1.9	49		46.55	1.64545	Lam.Ch.Dol.
																																51.6	43.2	5.2	50		45.8	4.50333	Lam.Ch.Dol.
																																50.9	44.3	4.8	51		46.7	4.15692	Lam.Ch.Dol.
																																44.7	54.7	0.6	52		55	0.519615	Lam.Ch.Dol.
																																42.7	53.8	3.5	53		55.55	3.03109	Lam.Ch.Dol.
																																40.9	51.6	7.5	54		55.35	6.49519	Lam.Ch.Dol.
																																84.3	6	9.7	10		10.85	8.40045	Lam.Ch.Sh.
																																84	8	8	11		12	6.9282	Lam.Ch.Sh.
																																82.5	12	5.5	12		14.75	4.76314	Lam.Ch.Sh.
																																78.4	12.4	9.2	17		17	7.96743	Lam.Ch.Sh.
																																64.2	22.4	13.4	35		29.1	11.6047	Lam.Ch.Sh.
																																84	4.5	11.5	3		10.25	9.95929	Siliceous Shale
																																79.9	9.4	10.7	18		14.75	9.26647	Siliceous Shale
																																78.8	6.7	14.5	19		13.95	12.5574	Siliceous Shale
																																78	4.5	17.5	20		13.25	15.1554	Siliceous Shale
																																76.4	13.1	10.5	26		18.35	9.09327	Siliceous Shale
																																76.1	0.5	23.4	22		12.2	20.265	Siliceous Shale
																																74.9	2.6	22.5	21		13.85	19.4856	Siliceous Shale
																																73	12	15	25		19.5	12.9904	Siliceous Shale
																																70.7	6.1	23.2	24		17.7	20.0918	Siliceous Shale
																																68.8	19.3	11.9	34		25.25	10.3057	Siliceous Shale
																																65.2	23	11.8	36		28.9	10.2191	Siliceous Shale
																																63.5	14.9	21.6	37		25.7	18.7061	Siliceous Shale
																																58.5	26.5	15	42		34	12.9904	Siliceous Shale
[truncated: 36 more columns]

## Sheet: 8) Por_vs_UCS
Lith_Count	Rock	Code	Porosity %	UCS	Ref
1	Carbonate	L	0.022	102.18	Anikoh, 2014
2	Carbonate	L	0.025	127.94	Anikoh, 2014
3	Carbonate	L	0.029	122.7	Anikoh, 2014
4	Carbonate	L	0.03	74.38	Anikoh, 2014
5	Carbonate	L	0.033	133.64	Anikoh, 2014
6	Carbonate	L	0.006202	171.338	Chang, 2006
7	Carbonate	L	0.006274	240.247	Chang, 2006
8	Carbonate	L	0.008635	152.927	Chang, 2006
9	Carbonate	L	0.008911	164.835	Chang, 2006
10	Carbonate	L	0.008917	146.312	Chang, 2006
11	Carbonate	L	0.010596	150.172	Chang, 2006
12	Carbonate	L	0.012211	62.411	Chang, 2006
13	Carbonate	L	0.012272	165.278	Chang, 2006
14	Carbonate	L	0.012276	151.165	Chang, 2006
15	Carbonate	L	0.015194	76.415	Chang, 2006
16	Carbonate	L	0.016214	98.908	Chang, 2006
17	Carbonate	L	0.018065	149.736	Chang, 2006
18	Carbonate	L	0.018325	214.234	Chang, 2006
19	Carbonate	L	0.018326	209.493	Chang, 2006
20	Carbonate	L	0.019857	90.31	Chang, 2006
21	Carbonate	L	0.024033	173.003	Chang, 2006
22	Carbonate	L	0.028791	182.157	Chang, 2006
23	Carbonate	L	0.032893	199.58	Chang, 2006
24	Carbonate	L	0.033771	80.065	Chang, 2006
25	Carbonate	L	0.033835	173.009	Chang, 2006
26	Carbonate	L	0.034319	119.757	Chang, 2006																						X axis log scale
27	Carbonate	L	0.036624	209.946	Chang, 2006																						X axis	Y axis	Label
28	Carbonate	L	0.038999	79.076	Chang, 2006																						0.001	0.1	0.001
29	Carbonate	L	0.044037	91.648	Chang, 2006																						0.005	0.1	0.005
30	Carbonate	L	0.046826	126.821	Chang, 2006																						0.01	0.1	0.01
31	Carbonate	L	0.049924	73.681	Chang, 2006																						0.05	0.1	0.05
32	Carbonate	L	0.054208	107.09	Chang, 2006																						0.1	0.1	0.1
33	Carbonate	L	0.05998	158.252	Chang, 2006																						0.5	0.1	0.5
34	Carbonate	L	0.069065	64.652	Chang, 2006																						1	0.1	1
35	Carbonate	L	0.092381	141.734	Chang, 2006
36	Carbonate	L	0.092473	144.931	Chang, 2006
37	Carbonate	L	0.095286	105.683	Chang, 2006
38	Carbonate	L	0.097363	32.255	Chang, 2006
39	Carbonate	L	0.109859	75.042	Chang, 2006
40	Carbonate	L	0.11304	54.426	Chang, 2006
41	Carbonate	L	0.126018	49.914	Chang, 2006
42	Carbonate	L	0.139062	133.053	Chang, 2006
43	Carbonate	L	0.141144	42.316	Chang, 2006
44	Carbonate	L	0.153097	34.165	Chang, 2006
45	Carbonate	L	0.164207	33.841	Chang, 2006
46	Carbonate	L	0.216859	38.946	Chang, 2006
47	Carbonate	L	0.218162	52.177	Chang, 2006
48	Carbonate	L	0.005	152.814	D'Andrea, 1965
49	Carbonate	L	0.00540541	179.462	D'Andrea, 1965
50	Carbonate	L	0.00581395	146.655	D'Andrea, 1965
51	Carbonate	L	0.0116279	97.0621	D'Andrea, 1965
52	Carbonate	L	0.0406977	113.117	D'Andrea, 1965
53	Carbonate	L	0.0639535	107.303	D'Andrea, 1965
54	Carbonate	L	0.0639535	134.614	D'Andrea, 1965
55	Carbonate	L	0.0872093	114.71	D'Andrea, 1965
56	Carbonate	L	0.104651	117.448	D'Andrea, 1965
57	Carbonate	L	0.110465	91.931	D'Andrea, 1965
58	Carbonate	L	0.22093	35.2483	D'Andrea, 1965
59	Carbonate	L	0.244186	52.9655	D'Andrea, 1965
60	Carbonate	L	0.01	96.5264	Deere, 1966, Table 4.2
61	Carbonate	L	0.038999	158.579	Deere, 1966, Table 4.2					Carbonate Porosity	Carbonate UCS	Carbonate Refs
62	Carbonate	L	0.103825	158.579	Deere, 1966, Table 4.2
63	Carbonate	L	0.136612	96.5264	Deere, 1966, Table 4.2
64	Carbonate	L	0.20765	92.3896	Deere, 1966, Table 4.2
65	Carbonate	L	0.296512	51.7106	Deere, 1966, Table 4.2
66	Carbonate	L	0.034	173	Han 2009 Table 1
67	Carbonate	L	0.034319	173	Han 2009 Table 1
68	Carbonate	L	0.095	105.5	Han 2009 Table 1
69	Carbonate	L	0.203297	86.9	Han 2009 Table 1
70	Carbonate	L	0.018326	197	Han 2009 Table 2
71	Carbonate	L	0.024033	193	Han 2009 Table 2
72	Carbonate	L	0.120879	158	Han 2009 Table 2
73	Carbonate	L	0.018065	175	Kahraman 2012
1	Chalk	Ck	0.33	7.20831	Bowden, 2002
2	Chalk	Ck	0.35	6.3017	Bowden, 2002
3	Chalk	Ck	0.36	5.73366	Bowden, 2002
4	Chalk	Ck	0.38	5.335	Bowden, 2002
5	Chalk	Ck	0.4	3.95243	Bowden, 2002
6	Chalk	Ck	0.42	4.06292	Bowden, 2002
7	Chalk	Ck	0.44	3.32768	Bowden, 2002
8	Chalk	Ck	0.46	2.67106	Bowden, 2002
9	Chalk	Ck	0.47	2.27179	Bowden, 2002
10	Chalk	Ck	0.48	1.842	Bowden, 2002
1	Chert	C	0.0079966	390.954	Aliyu, 2016
2	Chert	C	0.0116459	402.65	Aliyu, 2016
3	Chert	C	0.0143154	256.16	Aliyu, 2016
4	Chert	C	0.0147378	494.015	Aliyu, 2016
5	Chert	C	0.015759	347.7	Aliyu, 2016
6	Chert	C	0.0162348	517.246	Aliyu, 2016
7	Chert	C	0.016724	341.986	Aliyu, 2016
1	Diatomite	Dm	0.61	1.09	Zhang, 2013
2	Diatomite	Dm	0.606	2.11	Zhang, 2013
3	Diatomite	Dm	0.62	1.36	Zhang, 2013
4	Diatomite	Dm	0.643	0.4	Zhang, 2013
5	Diatomite	Dm	0.61863	2.6626	Yamamoto
6	Diatomite	Dm	0.59191	2.567	Yamamoto
1	Granite	G	0.01	197	Anikoh, 2014
2	Granite	G	0.0117	148.91	Anikoh, 2014
3	Granite	G	0.0125	146.63	Anikoh, 2014
4	Granite	G	0.0133	184.69	Anikoh, 2014
5	Granite	G	0.02	167.37	Anikoh, 2014
6	Granite	G	0.00581395	126.863	Brandon, 1974
7	Granite	G	0.0177515	144.79	Brandon, 1974
8	Granite	G	0.005	224.49	D'Andrea, 1965
9	Granite	G	0.005	216.655	D'Andrea, 1965
10	Granite	G	0.005	195.862	D'Andrea, 1965
11	Granite	G	0.005	186.345	D'Andrea, 1965
12	Granite	G	0.012	133.793	D'Andrea, 1965
13	Granite	G	0.012	132.09	D'Andrea, 1965
14	Granite	G	0.029	209.386	D'Andrea, 1965
15	Granite	G	0.029	208.503	D'Andrea, 1965
16	Granite	G	0.047	135.931	D'Andrea, 1965
17	Granite	G	0.00555556	165.474	Deere, 1966, Table 4.2
18	Granite	G	0.0295858	234.421	Deere, 1966, Table 4.2
19	Granite	G	0.0295858	196.5	Deere, 1966, Table 4.2
20	Granite	G	0.00591716	244.07	Han 2009 Table 1
21	Granite	G	0.00591716	226.15	Han 2009 Table 1
22	Granite	G	0.0236686	193	Han 2009 Table 2
23	Granite	G	0.0295858	251	Han 2009 Table 2
24	Granite	G	0.0042	125.3	Ludovico-Marques, 2012
25	Granite	G	0.0043	120.8	Ludovico-Marques, 2012
26	Granite	G	0.0044	137.1	Ludovico-Marques, 2012
27	Granite	G	0.0045	136.2	Ludovico-Marques, 2012
28	Granite	G	0.0048	135.4	Ludovico-Marques, 2012
29	Granite	G	0.0049	135.9	Ludovico-Marques, 2012
30	Granite	G	0.011	109.2	Ludovico-Marques, 2012
31	Granite	G	0.0111	116.9	Ludovico-Marques, 2012
32	Granite	G	0.0111	116	Ludovico-Marques, 2012
33	Granite	G	0.0111	111.2	Ludovico-Marques, 2012
34	Granite	G	0.0033	251	Rahn, 1996
35	Granite	G	0.0029	136.447	Stowe, 1969
36	Granite	G	0.0236686	281	Westerly Granite, Scholz, 1968
1	Sandstone	Sa	0.0606061	148.237	Brandon, 1974
2	Sandstone	Sa	0.0666667	113.074	Brandon, 1974
3	Sandstone	Sa	0.121212	73.7738	Brandon, 1974
4	Sandstone	Sa	0.157576	90.3212	Brandon, 1974
5	Sandstone	Sa	0.181818	78.6001	Brandon, 1974
6	Sandstone	Sa	0.333333	46.1948	Brandon, 1974
7	Sandstone	Sa	0.381818	24.4763	Brandon, 1974
8	Sandstone	Sa	0.284848	40.8621	D'Andrea, 1966
9	Sandstone	Sa	0.12	86.9	Han 2009 Table 1
10	Sandstone	Sa	0.157576	90.32	Han 2009 Table 1
11	Sandstone	Sa	0.16	71.71	Han 2009 Table 1
12	Sandstone	Sa	0.25	32.82	Han 2009 Table 1
13	Sandstone	Sa	0.0393	164	Jizba, 1987
14	Sandstone	Sa	0.0532	177	Jizba, 1989
15	Sandstone	Sa	0.0715	150	Jizba, 1986
16	Sandstone	Sa	0.0939	85	Jizba, 1983
17	Sandstone	Sa	0.0949	176	Jizba, 1988
18	Sandstone	Sa	0.1119	99	Jizba, 1984
19	Sandstone	Sa	0.1386	125	Jizba, 1985
20	Sandstone	Sa	0.186	20	Jizba, 1982
21	Sandstone	Sa	0.046	98	Jizba, 1991
22	Sandstone	Sa	0.0594	78	Jizba, 1991
23	Sandstone	Sa	0.0511	64	Jizba, 1991
24	Sandstone	Sa	0.0338	110	Jizba, 1991
25	Sandstone	Sa	0.0524	78	Jizba, 1991
26	Sandstone	Sa	0.0557	149	Jizba, 1991
27	Sandstone	Sa	0.0669	225	Jizba, 1991
28	Sandstone	Sa	0.036	135.7	Ludovico-Marques, 2012
29	Sandstone	Sa	0.038	136.2	Ludovico-Marques, 2012
30	Sandstone	Sa	0.042	120.3	Ludovico-Marques, 2012
31	Sandstone	Sa	0.042	104	Ludovico-Marques, 2012
32	Sandstone	Sa	0.043	105.2	Ludovico-Marques, 2012
33	Sandstone	Sa	0.046	102.3	Ludovico-Marques, 2012
34	Sandstone	Sa	0.067	105.3	Ludovico-Marques, 2012
35	Sandstone	Sa	0.07	95	Ludovico-Marques, 2012
36	Sandstone	Sa	0.172	24.5	Ludovico-Marques, 2012
37	Sandstone	Sa	0.184	18.7	Ludovico-Marques, 2012
38	Sandstone	Sa	0.185	20	Ludovico-Marques, 2012
39	Sandstone	Sa	0.186	17.9	Ludovico-Marques, 2012
40	Sandstone	Sa	0.186	17.6	Ludovico-Marques, 2012
41	Sandstone	Sa	0.021789	213.015	Chang, 2006
42	Sandstone	Sa	0.023535	91.488	Chang, 2006
43	Sandstone	Sa	0.025861	197.513	Chang, 2006
44	Sandstone	Sa	0.028666	260.24	Chang, 2006
45	Sandstone	Sa	0.038151	170.439	Chang, 2006
46	Sandstone	Sa	0.040433	107.46	Chang, 2006
47	Sandstone	Sa	0.040496	186.796	Chang, 2006
48	Sandstone	Sa	0.0427	119.635	Chang, 2006
49	Sandstone	Sa	0.04583	115.204	Chang, 2006
50	Sandstone	Sa	0.052636	125.406	Chang, 2006
51	Sandstone	Sa	0.053036	79.157	Chang, 2006
52	Sandstone	Sa	0.053582	91.21	Chang, 2006
53	Sandstone	Sa	0.061559	112.85	Chang, 2006
54	Sandstone	Sa	0.06156	105.101	Chang, 2006
55	Sandstone	Sa	0.063757	74.472	Chang, 2006
56	Sandstone	Sa	0.064775	67.951	Chang, 2006
57	Sandstone	Sa	0.066024	83.94	Chang, 2006
58	Sandstone	Sa	0.067581	125.144	Chang, 2006
59	Sandstone	Sa	0.074557	65.481	Chang, 2006
60	Sandstone	Sa	0.076434	66.955	Chang, 2006
61	Sandstone	Sa	0.077058	80.608	Chang, 2006
62	Sandstone	Sa	0.08574	94.621	Chang, 2006
63	Sandstone	Sa	0.10163	64.961	Chang, 2006
64	Sandstone	Sa	0.122597	84.988	Chang, 2006
65	Sandstone	Sa	0.131524	48.447	Chang, 2006
66	Sandstone	Sa	0.143885	58.151	Chang, 2006
67	Sandstone	Sa	0.176991	21.216	Chang, 2006
68	Sandstone	Sa	0.182625	22.932	Chang, 2006
69	Sandstone	Sa	0.199756	48.129	Chang, 2006
70	Sandstone	Sa	0.330827	11.09	Chang, 2006
1	Shale	Sh	0.017255	184.555	Chang, 2006
2	Shale	Sh	0.065782	122.506	Chang, 2006
3	Shale	Sh	0.018425	113.219	Chang, 2006
4	Shale	Sh	0.015301	112.331	Chang, 2006
5	Shale	Sh	0.016802	110.145	Chang, 2006
6	Shale	Sh	0.166141	108.074	Chang, 2006
7	Shale	Sh	0.016932	101.262	Chang, 2006
8	Shale	Sh	0.010821	81.515	Chang, 2006
9	Shale	Sh	0.162042	67.761	Chang, 2006
10	Shale	Sh	0.018223	35.939	Chang, 2006
11	Shale	Sh	0.102959	24.584	Chang, 2006
12	Shale	Sh	0.165944	22.799	Chang, 2006
13	Shale	Sh	0.103836	20.416	Chang, 2006
14	Shale	Sh	0.285668	16.975	Chang, 2006
15	Shale	Sh	0.235431	16.435	Chang, 2006
16	Shale	Sh	0.265674	15.269	Chang, 2006
17	Shale	Sh	0.34603	13.687	Chang, 2006
18	Shale	Sh	0.300167	13.352	Chang, 2006
19	Shale	Sh	0.275048	12.808	Chang, 2006
20	Shale	Sh	0.395268	12.655	Chang, 2006
21	Shale	Sh	0.210315	12.612	Chang, 2006
22	Shale	Sh	0.145081	12.416	Chang, 2006
23	Shale	Sh	0.315663	12.256	Chang, 2006
24	Shale	Sh	0.325536	12.118	Chang, 2006
25	Shale	Sh	0.285546	11.85	Chang, 2006
26	Shale	Sh	0.279048	10.963	Chang, 2006
27	Shale	Sh	0.265427	10.76	Chang, 2006
28	Shale	Sh	0.299669	10.482	Chang, 2006
29	Shale	Sh	0.345407	10.407	Chang, 2006
30	Shale	Sh	0.302044	9.047	Chang, 2006
31	Shale	Sh	0.288922	8.57	Chang, 2006
32	Shale	Sh	0.370527	8.559	Chang, 2006
33	Shale	Sh	0.340285	8.221	Chang, 2006
34	Shale	Sh	0.2798	8.093	Chang, 2006
35	Shale	Sh	0.431012	7.936	Chang, 2006
36	Shale	Sh	0.325289	7.882	Chang, 2006
37	Shale	Sh	0.345534	7.059	Chang, 2006
38	Shale	Sh	0.299796	6.792	Chang, 2006
39	Shale	Sh	0.314293	5.97	Chang, 2006
40	Shale	Sh	0.275053	5.702	Chang, 2006
41	Shale	Sh	0.317668	3.441	Chang, 2006
42	Shale	Sh	0.2908	3.377	Chang, 2006
43	Shale	Sh	0.280303	2.832	Chang, 2006
44	Shale	Sh	0.431515	2.606	Chang, 2006
45	Shale	Sh	0.394025	2.064	Chang, 2006
46	Shale	Sh	0.290051	1.737	Chang, 2006
47	Shale	Sh	0.350286	1.729	Chang, 2006
48	Shale	Sh	0.400649	1.722	Chang, 2006
49	Shale	Sh	0.410647	1.242	Chang, 2006
50	Shale	Sh	0.485878	1.095	Chang, 2006
51	Shale	Sh	0.37903	0.7	Chang, 2006
1	Quartzite	Qz	0.0363636	214.9	D'Andrea, 1965
2	Quartzite	Qz	0.0121212	311.5	D'Andrea, 1965
3	Quartzite	Qz	0.005	320.1	Han 2009
4	Quartzite	Qz	0.0181818	374	Han 2009
5	Quartzite	Qz	0.0077	340	Jizba, 1991
6	Quartzite	Qz	0.018	328.19	Deere, 1966
7	Quartzite	Qz	0.005	505	Scholz, 1968
1	Basalt	Ba	0.037234	171.679	Brandon, 1974
2	Basalt	Ba	0.00507614	292.062	D'Andrea, 1965,mean of 10 samples from same locality
3	Basalt	Ba	0.0105263	149.172	D'Andrea, 1965,mean of 5 samples from same locality
4	Basalt	Ba	0.00531915	368.869	Deere, 1966, Table 4.2
5	Basalt	Ba	0.0319149	306.127	Deere, 1966, Table 4.2
6	Basalt	Ba	0.0347	147.616	Stowe_1969
7	Basalt	Ba	0.0359	156.786	Stowe_1969
8	Basalt	Ba	0.04	130.449	Stowe_1969
9	Basalt	Ba	0.04	147.341	Stowe_1969
10	Basalt	Ba	0.04	157.545	Stowe_1969
11	Basalt	Ba	0.045	146.513	Stowe_1969
12	Basalt	Ba	0.045	153.822	Stowe_1969
13	Basalt	Ba	0.0524	142.928	Stowe_1969
14	Basalt	Ba	0.0535	150.374	Stowe_1969
15	Basalt	Ba	0.014	111.51	Yasar, 2014
1	Silcrete	Sc	0.0197	554	Webb, 2008

## Sheet: 9) UCS_Stress_Strain_Curves
CHERT				GRANITE					SANDSTONE A: 3.8% POROSITY						SANDSTONE B: 6.7% POROSITY						SANDSTONE M: 19% POROSITY
SEUK Aliyu, 2019				Ludovico-Marques, 2012					Ludovico-Marques, 2012						Ludovico-Marques, 2012						Ludovico-Marques, 2012
Strain 10-3e	UCS Mpa	% Strain		Strain 10-3e	UCS Mpa	% Strain			Strain 10-3e	UCS Mpa	% Strain				Strain 10-3e	UCS Mpa	% Strain				Strain 10-3e	UCS Mpa	% Strain
0	0	0		0	0	0			0	0	0				0	0	0				0.0054	0	5.4e-06
0.420284	17.4506	0.000420284		0.0533	1	5.33e-05			0.1166	1.152	0.0001166				0.1139	0.601	0.0001139				0.1465	0.2	0.0001465
0.443253	18.2466	0.000443253		0.11495	3	0.00011495			0.1817	1.728	0.0001817				0.2007	1.102	0.0002007				0.2739	0.4	0.0002739
0.468748	19.4728	0.000468748		0.16992	5	0.00016992			0.2305	2.304	0.0002305				0.3038	2.051	0.0003038				0.4366	0.7	0.0004366
0.495127	20.4864	0.000495127		0.23823	7.5	0.00023823			0.2983	3.106	0.0002983				0.4909	3	0.0004909				0.5858	1	0.0005858
0.516007	21.6581	0.000516007		0.39317	13.5	0.00039317			0.3661	4.157	0.0003661				0.6319	4.459	0.0006319				0.8001	1.4	0.0008001
0.541035	22.6568	0.000541035		0.50478	18	0.00050478			0.4394	5.56	0.0004394				0.8163	6.212	0.0008163				0.9465	1.75	0.0009465
0.567704	23.7496	0.000567704		0.64972	23.541	0.00064972			0.5289	7.112	0.0005289				0.9954	7.765	0.0009954				1.0794	2.007	0.0010794
0.590876	24.8966	0.000590876		0.76966	28.182	0.00076966			0.6319	8.564	0.0006319				1.1527	9.468	0.0011527				1.1879	2.25	0.0011879
0.613737	25.9003	0.000613737		0.85462	32.064	0.00085462			0.7594	11.018	0.0007594				1.291	10.82	0.001291				1.3181	2.59373	0.0013181
0.638317	27.1462	0.000638317		0.9479	36	0.0009479			0.914	13.973	0.000914				1.4076	11.972	0.0014076				1.4673	2.98762	0.0014673
0.664517	28.2686	0.000664517		1.1178	43	0.0011178			1.0876	17.329	0.0010876				1.5161	13.224	0.0015161				1.6083	3.35986	0.0016083
0.688398	29.287	0.000688398		1.2594	49.2304	0.0012594			1.3262	22.136	0.0013262				1.6544	14.877	0.0016544				1.7493	3.7321	0.0017493
0.713436	29.9249	0.000713436		1.35436	53.4086	0.00135436			1.6788	29.849	0.0016788				1.7737	16.53	0.0017737				1.8659	4.03992	0.0018659
0.737045	31.512	0.000737045		1.39599	55.2404	0.00139599			1.9717	37.41	0.0019717				1.8795	18.333	0.0018795				1.9744	4.32636	0.0019744
0.758125	32.664	0.000758125		1.4793	58.906	0.0014793			2.3026	46.0134	0.0023026				2.0205	20.336	0.0020205				2.0748	4.59142	0.0020748
0.779434	33.7617	0.000779434		1.53927	61.5447	0.00153927			2.6226	54.3334	0.0026226				2.186	22.84	0.002186				2.186	4.88498	0.002186
0.801738	34.8147	0.000801738		1.59923	64.1829	0.00159923			2.9182	62.019	0.0029182				2.3623	26.146	0.0023623				2.308	5.20706	0.002308
0.8223	35.8727	0.0008223		1.64588	66.2355	0.00164588			3.3007	71.964	0.0033007				2.5521	29.201	0.0025521				2.4301	5.52941	0.0024301
0.843821	36.9507	0.000843821		1.69418	68.3607	0.00169418			3.6044	79.8602	0.0036044				2.7935	33.3048	0.0027935				2.5874	5.94468	0.0025874
0.865871	38.1768	0.000865871		1.7658	71.512	0.0017658			3.8838	87.1246	0.0038838				2.9752	36.3937	0.0029752				2.7365	6.3383	0.0027365
0.888796	39.299	0.000888796		1.86409	75.8368	0.00186409			4.1821	94.8804	0.0041821				3.1217	38.8842	0.0031217				2.8505	6.63926	0.0028505
0.910794	40.1692	0.000910794		1.95237	79.7211	0.00195237			4.4343	101.438	0.0044343				3.2763	41.5124	0.0032763				2.9888	7.00438	0.0029888
0.932791	41.4845	0.000932791		2.03566	83.3858	0.00203566			4.6188	106.235	0.0046188				3.4119	43.8176	0.0034119				3.0918	7.2763	0.0030918
0.952255	42.493	0.000952255		2.13394	87.7102	0.00213394			4.7	108	0.0047				3.5909	46.8606	0.0035909				3.2247	7.62715	0.0032247
0.970732	43.655	0.000970732		2.19057	90.2019	0.00219057			4.8	110	0.0048				3.8268	50.8709	0.0038268				3.3902	8.06407	0.0033902
0.989978	44.7477	0.000989978		2.2722	93.7936	0.0022722			4.9	112	0.0049				4.0438	54.5599	0.0040438				3.6288	8.69398	0.0036288
1.00848	45.8206	0.00100848		2.3505	97.2388	0.0023505			5	114	0.005				4.2499	57.848	0.0042499				3.8078	9.16654	0.0038078
1.02748	46.9922	0.00102748		2.4388	101.124	0.0024388			5.1	116	0.0051				4.3882	60.051	0.0043882				4.0004	9.675	0.0040004
1.04529	47.9662	0.00104529		2.50376	104.292	0.00250376			5.2	118	0.0052				4.6242	64.509	0.0046242				4.1875	10.1689	0.0041875
1.06448	49.0936	0.00106448		2.63036	110.072	0.00263036			5.3406	120.948	0.0053406				4.7923	67.213	0.0047923				4.3937	10.7133	0.0043937
1.08233	50.2852	0.00108233		2.74029	115.346	0.00274029			5.4812	123.897	0.0054812				4.9605	70.468	0.0049605				4.5998	11.2574	0.0045998
1.10317	51.3829	0.00110317		2.83858	119.185	0.00283858			5.6494	127.102	0.0056494				5.1449	73.323	0.0051449				4.7869	11.7514	0.0047869
1.12262	52.4755	0.00112262		2.95353	123.5	0.00295353			5.8094	130.332	0.0058094				5.3429	76.729	0.0053429				4.9795	12.2598	0.0049795
1.14112	53.578	0.00114112		3.05016	126.5	0.00305016			6	133.562	0.006				5.5409	80.134	0.0055409				5.1585	12.7324	0.0051585
1.15799	54.5865	0.00115799		3.12346	129.184	0.00312346			6.1023	135.565	0.0061023				5.6846	82.238	0.0056846				5.3646	13.2765	0.0053646
1.17747	55.6645	0.00117747		3.19844	131.125	0.00319844			6.1592	136.517	0.0061592				5.8067	83.79	0.0058067				5.5083	13.6559	0.0055083
1.19687	56.8609	0.00119687		3.28508	133.065	0.00328508			6.2515	136.517	0.0062515				5.9477	85.894	0.0059477				5.6602	14.0569	0.0056602			Sample	Strain	Stress	Strain %
1.2145	57.9537	0.0012145		3.3734	134.583	0.0033734									6.124	88.198	0.006124				5.7687	14.3433	0.0057687			Chert	7.74504	609.474	0.00774504
1.23232	59.0512	0.00123232		3.43672	135.469	0.00343672									6.2705	89.951	0.0062705				5.8772	14.6298	0.0058772			Granite	3.8601	131.881	0.0038601
1.25061	60.139	0.00125061		3.49671	136.102	0.00349671									6.3925	91.504	0.0063925				5.9748	14.8874	0.0059748			SANDSTONE A: 3.8% POROSITY	6.2515	136.517	0.0062515
1.26703	61.1278	0.00126703		3.55171	136.397	0.00355171									6.5173	92.956	0.0065173				6.0643	15.1237	0.0060643			SANDSTONE B: 6.7% POROSITY	7.8055	105.679	0.0078055
1.28506	62.3343	0.00128506		3.62837	136.861	0.00362837									6.6746	94.759	0.0066746				6.2244	15.5464	0.0062244
1.3031	63.4418	0.0013031		3.66337	136.86	0.00366337									6.8156	96.362	0.0068156				6.4223	16.0688	0.0064223
1.32139	64.5294	0.00132139		3.72004	136.607	0.00372004									6.9105	97.814	0.0069105				6.5607	16.4342	0.0065607
1.33829	65.5975	0.00133829		3.79173	135	0.00379173									7.0434	99.117	0.0070434				6.7342	16.8922	0.0067342
1.35564	66.6406	0.00135564		3.8601	131.881	0.0038601									7.1682	100.369	0.0071682				6.9	17.26	0.0069
1.37159	67.6739	0.00137159													7.4177	102.823	0.0074177				7.1	17.59	0.0071
1.39009	68.91	0.00139009													7.556	104.026	0.007556				7.4	18	0.0074
1.40721	70.0273	0.00140721													7.6753	104.977	0.0076753				7.7	18.35	0.0077
1.42363	71.1151	0.00142363													7.8055	105.679	0.0078055				8.1283	18.606	0.0081283
1.44075	72.2078	0.00144075																			8.2178	17.805	0.0082178
1.45763	73.1719	0.00145763																			8.3073	17.605	0.0083073
1.47497	74.141	0.00147497																			8.47	17.405	0.00847
1.49091	75.4265	0.00149091																			8.5975	17.155	0.0085975
1.50735	76.633	0.00150735																			8.7168	16.555	0.0087168
1.52424	77.5623	0.00152424																			8.8416	15.804	0.0088416
1.54157	78.7144	0.00154157																			8.9392	15.204	0.0089392
1.55798	79.7675	0.00155798																			9.0938	14.704	0.0090938
1.57325	81.0184	0.00157325																			9.243	14.454	0.009243
1.58989	82.121	0.00158989																			9.5006	14.104	0.0095006
1.60724	83.1791	0.00160724																			9.6335	13.904	0.0096335
1.62274	84.2074	0.00162274																			9.742	13.704	0.009742
1.63938	85.3694	0.00163938																			9.8586	13.404	0.0098586
1.65696	86.5312	0.00165696																			9.9752	13.255	0.0099752
1.67107	87.6685	0.00167107																			10.062	12.904	0.010062
1.68701	87.8315	0.00168701																			10.1434	12.754	0.0101434
1.70389	89.8537	0.00170389																			10.2465	12.504	0.0102465
1.71913	90.986	0.00171913																			10.3604	12.054	0.0103604
1.73438	91.9995	0.00173438																			10.4661	11.754	0.0104661
1.75263	93.1712	0.00175263																			10.5719	11.304	0.0105719
1.76536	94.2739	0.00176536																			10.6479	10.904	0.0106479
1.782	95.3615	0.001782																			10.7401	10.604	0.0107401
1.79679	96.4493	0.00179679																			10.816	10.203	0.010816
1.81112	97.4679	0.00181112																			10.8784	9.553	0.0108784
1.82661	98.4914	0.00182661																			10.9679	9.453	0.0109679
1.8414	99.7471	0.0018414																			11.0384	9.153	0.0110384
1.85711	100.771	0.00185711																			11.1143	8.702	0.0111143
1.87374	101.942	0.00187374																			11.1686	8.602	0.0111686
1.89015	103.035	0.00189015																			11.2418	8.302	0.0112418
1.90657	104.098	0.00190657																			11.3259	8.052	0.0113259
1.92042	105.255	0.00192042																			11.4127	7.752	0.0114127
1.93522	106.343	0.00193522																			11.4886	7.502	0.0114886
1.95139	107.435	0.00195139																			11.5537	7.302	0.0115537
1.96572	108.469	0.00196572																			11.6812	7.052	0.0116812
1.9805	109.547	0.0019805																			11.787	6.802	0.011787
1.99621	110.511	0.00199621																			11.8765	6.502	0.0118765
2.01007	111.683	0.00201007																			11.9822	5.951	0.0119822
2.02463	112.923	0.00202463																			12.0419	5.751	0.0120419
2.03918	114.026	0.00203918																			12.1395	5.251	0.0121395
2.05397	115.138	0.00205397																			12.2426	4.5	0.0122426
2.06968	116.137	0.00206968																			12.3348	3.95	0.0123348
2.08354	117.284	0.00208354																			12.446	3.7	0.012446
2.09878	118.421	0.00209878																			12.6277	3.55	0.0126277
2.11425	119.524	0.00211425																			12.8121	3.351	0.0128121
2.12996	120.607	0.00212996																			12.9261	3.101	0.0129261
2.14497	121.685	0.00214497																			13.1159	2.901	0.0131159
2.16183	122.688	0.00216183																			13.4875	2.852	0.0134875
2.17546	123.741	0.00217546
2.18978	124.968	0.00218978
2.20363	126.12	0.00220363
2.21795	127.187	0.00221795
2.23227	128.251	0.00223227
2.24635	129.314	0.00224635
2.26067	130.54	0.00226067
2.27498	131.637	0.00227498
2.29045	132.755	0.00229045
2.30408	133.833	0.00230408
2.32024	134.891	0.00232024
2.33432	135.954	0.00233432
2.34864	137.14	0.00234864
2.36225	138.253	0.00236225
2.3768	139.281	0.0023768
2.39042	140.408	0.00239042
2.40357	141.452	0.00240357
2.41904	142.51	0.00241904
2.43243	143.761	0.00243243
2.4472	144.824	0.0024472
2.46012	145.946	0.00246012
2.47512	147.004	0.00247512
2.48828	148.057	0.00248828
2.50167	149.239	0.00250167
2.51552	150.366	0.00251552
2.4989	151.424	0.0024989
2.51344	152.522	0.00251344
2.52636	153.53	0.00252636
2.54021	154.514	0.00254021
2.55451	155.656	0.00255451
2.56767	156.981	0.00256767
2.58059	158.025	0.00258059
2.59421	159.013	0.00259421
2.60921	160.136	0.00260921
2.62213	161.372	0.00262213
2.63643	162.489	0.00263643
2.64982	163.567	0.00264982
2.6625	164.679	0.0026625
2.67611	165.747	0.00267611
2.68857	166.855	0.00268857
2.70449	168.017	0.00270449
2.71741	169.144	0.00271741
2.73102	170.128	0.00273102
2.74301	170.351	0.00274301
2.75639	172.333	0.00275639
2.77046	173.386	0.00277046
2.78338	174.662	0.00278338
2.79653	175.769	0.00279653
2.80898	176.822	0.00280898
2.82282	177.886	0.00282282
2.8355	178.899	0.0028355
2.84911	180.175	0.00284911
2.86225	181.173	0.00286225
2.87517	182.36	0.00287517
2.88785	183.472	0.00288785
2.9003	184.516	0.0029003
2.91322	185.663	0.00291322
2.92729	186.785	0.00292729
2.93952	187.878	0.00293952
2.95219	188.995	0.00295219
2.96509	190.083	0.00296509
2.97777	191.072	0.00297777
2.99022	192.244	0.00299022
3.00405	193.376	0.00300405
3.01673	194.384	0.00301673
3.02988	195.591	0.00302988
3.04279	196.634	0.00304279
3.05707	197.648	0.00305707
3.06953	198.879	0.00306953
3.08267	199.942	0.00308267
3.09442	200.936	0.00309442
3.10709	202.137	0.00310709
3.11978	203.135	0.00311978
3.13338	204.514	0.00313338
3.14674	205.618	0.00314674
3.16077	206.704	0.00316077
3.17414	207.823	0.00317414
3.18704	208.836	0.00318704
3.19925	209.89	0.00319925
3.21243	211.141	0.00321243
3.22645	212.233	0.00322645
3.24097	213.325	0.00324097
3.25208	214.439	0.00325208
3.26429	215.471	0.00326429
3.27674	216.639	0.00327674
3.28894	217.731	0.00328894
3.30182	218.819	0.00330182
3.31402	219.935	0.00331402
3.32741	220.985	0.00332741
3.34121	221.993	0.00334121
3.35319	223.223	0.00335319
3.36493	224.352	0.00336493
3.37923	225.404	0.00337923
3.3919	226.477	0.0033919
3.40478	227.6	0.00340478
3.4168	228.643	0.0034168
3.43015	229.804	0.00343015
3.44238	230.936	0.00344238
3.45455	232	0.00345455
3.46725	233.054	0.00346725
3.47988	234.112	0.00347988
3.49233	235.071	0.00349233
3.50525	235.129	0.00350525
3.51701	237.546	0.00351701
3.52941	238.661	0.00352941
3.54229	239.698	0.00354229
3.55288	240.634	0.00355288
3.56555	241.892	0.00356555
3.57665	243.065	0.00357665
3.58971	244.139	0.00358971
3.6033	245.251	0.0036033
3.61665	246.23	0.00361665
3.63091	247.445	0.00363091
3.64242	248.539	0.00364242
3.65533	249.631	0.00365533
3.66799	250.739	0.00366799
3.67971	251.787	0.00367971
3.69216	252.77	0.00369216
3.70551	254.027	0.00370551
3.7184	255.144	0.0037184
3.73083	256.099	0.00373083
3.74442	257.33	0.00374442
3.75721	258.313	0.00375721
3.76939	259.524	0.00376939
3.78255	260.636	0.00378255
3.79565	261.493	0.00379565
3.80876	262.862	0.00380876
3.82142	263.876	0.00382142
3.83477	264.849	0.00383477
3.84681	266.096	0.00384681
3.85947	267.246	0.00385947
3.87307	268.344	0.00387307
3.88531	269.438	0.00388531
3.89704	270.456	0.00389704
3.90897	271.629	0.00390897
3.92026	272.751	0.00392026
3.93018	273.768	0.00393018
3.94375	274.951	0.00394375
3.9562	275.93	0.0039562
3.96854	276.924	0.00396854
3.98197	278.233	0.00398197
3.99593	279.335	0.00399593
4.00836	280.294	0.00400836
4.0197	281.555	0.0040197
4.0332	282.494	0.0040332
4.04698	283.538	0.00404698
4.05756	284.819	0.00405756
4.07159	285.873	0.00407159
4.08128	286.969	0.00408128
4.09485	288.111	0.00409485
4.1052	289.057	0.0041052
4.11923	290.352	0.00411923
4.13144	291.444	0.00413144
4.14384	292.576	0.00414384
4.15679	293.61	0.00415679
4.16877	294.674	0.00416877
4.18257	295.715	0.00418257
4.19512	296.956	0.00419512
4.20869	298.07	0.00420869
4.22295	299.122	0.00422295
4.22504	300.224	0.00422504
4.24024	301.318	0.00424024
4.25261	302.44	0.00425261
4.26569	303.529	0.00426569
4.27925	304.705	0.00427925
4.29328	305.757	0.00429328
4.30549	306.811	0.00430549
4.31834	307.82	0.00431834
4.33052	309.011	0.00433052
4.3434	309.98	0.0043434
4.3565	311.299	0.0043565
4.3696	312.403	0.0043696
4.38202	313.514	0.00438202
4.39443	314.501	0.00439443
4.40727	315.541	0.00440727
4.42017	316.826	0.00442017
4.43189	317.962	0.00443189
4.44428	319.05	0.00444428
4.45634	320.04	0.00445634
4.46778	321.274	0.00446778
4.48065	322.264	0.00448065
4.49285	323.501	0.00449285
4.50483	324.589	0.00450483
4.51831	325.626	0.00451831
4.53164	326.616	0.00453164
4.54315	327.851	0.00454315
4.55556	328.989	0.00455556
4.56797	330.075	0.00456797
4.58026	331.213	0.00458026
4.59281	332.203	0.00459281
4.60519	333.389	0.00460519
4.61829	334.477	0.00461829
4.63161	334.328	0.00463161
4.64471	336.651	0.00464471
4.65858	337.739	0.00465858
4.67211	338.777	0.00467211
4.68468	340.064	0.00468468
4.69663	341.102	0.00469663
4.70923	341.991	0.00470923
4.72262	343.278	0.00472262
4.73542	344.364	0.00473542
4.74785	345.55	0.00474785
4.75977	346.54	0.00475977
4.77358	347.678	0.00477358
4.78733	348.814	0.00478733
4.80048	349.804	0.00480048
4.81374	350.743	0.00481374
4.82519	352.078	0.00482519
4.83798	353.166	0.00483798
4.8514	354.252	0.0048514
4.86544	355.34	0.00486544
4.87738	356.479	0.00487738
4.88952	357.516	0.00488952
4.90241	358.753	0.00490241
4.91435	359.594	0.00491435
4.92672	360.879	0.00492672
4.93915	361.967	0.00493915
4.95227	363.005	0.00495227
4.96463	364.191	0.00496463
4.97726	365.378	0.00497726
4.98874	364.734	0.00498874
5.00137	367.554	0.00500137
5.01399	368.541	0.00501399
5.02658	369.629	0.00502658
5.04039	370.816	0.00504039
5.0542	371.954	0.0050542
5.06721	373.09	0.00506721
5.07948	374.08	0.00507948
5.09168	375.168	0.00509168
5.1044	376.304	0.0051044
5.11794	377.392	0.00511794
5.1306	378.579	0.0051306
5.14299	379.616	0.00514299
5.15653	380.656	0.00515653
5.16961	381.742	0.00516961
5.18334	382.931	0.00518334
5.19646	384.067	0.00519646
5.20931	385.155	0.00520931
5.22235	386.243	0.00522235
5.23547	387.331	0.00523547
5.24832	388.467	0.00524832
5.26136	389.555	0.00526136
5.28319	390.643	0.00528319
5.29623	391.878	0.00529623
5.30923	392.918	0.00530923
5.32292	393.955	0.00532292
5.33573	395.142	0.00533573
5.349	396.328	0.005349
5.361	397.515	0.005361
5.37347	398.85	0.00537347
5.38627	399.641	0.00538627
5.39881	400.383	0.00539881
5.41108	401.668	0.00541108
5.42412	402.657	0.00542412
5.43807	403.942	0.00543807
5.45091	405.129	0.00545091
5.46429	407.699	0.00546429
5.4782	408.837	0.0054782
5.491	410.074	0.005491
5.50453	410.468	0.00550453
5.516	411.953	0.005516
5.52834	413.288	0.00552834
5.54099	414.326	0.00554099
5.55287	415.462	0.00555287
5.56565	416.502	0.00556565
5.57813	417.539	0.00557813
5.59102	418.627	0.00559102
5.60381	419.913	0.00560381
5.61619	421.001	0.00561619
5.62972	422.187	0.00562972
5.64233	423.225	0.00564233
5.65608	424.116	0.00565608
5.66892	425.598	0.00566892
5.68203	426.982	0.00568203
5.69463	428.218	0.00569463
5.7072	429.554	0.0057072
5.72025	430.789	0.00572025
5.73262	430.839	0.00573262
5.74454	431.036	0.00574454
5.75765	432.076	0.00575765
5.7709	433.51	0.0057709
5.78305	434.696	0.00578305
5.79611	435.883	0.00579611
5.8094	436.87	0.0058094
5.8238	436.92	0.0058238
5.83709	439.442	0.00583709
5.84951	440.53	0.00584951
5.86234	441.618	0.00586234
5.87586	442.656	0.00587586
5.88979	443.792	0.00588979
5.90377	444.979	0.00590377
5.91596	445.968	0.00591596
5.92897	447.205	0.00592897
5.94277	448.193	0.00594277
5.95582	449.48	0.00595582
5.96962	450.566	0.00596962
5.98373	451.406	0.00598373
5.99656	452.742	0.00599656
6.00943	453.779	0.00600943
6.02249	454.769	0.00602249
6.03481	456.054	0.00603481
6.04787	457.142	0.00604787
6.05996	458.131	0.00605996
6.07233	459.318	0.00607233
6.08625	460.406	0.00608625
6.10073	461.048	0.00610073
6.11493	462.729	0.00611493
6.12895	463.521	0.00612895
6.14236	464.854	0.00614236
6.15569	465.942	0.00615569
6.16902	466.932	0.00616902
6.18149	468.169	0.00618149
6.19339	469.305	0.00619339
6.20658	470.441	0.00620658
6.21986	471.481	0.00621986
6.23373	472.519	0.00623373
6.24688	473.607	0.00624688
6.26107	474.842	0.00626107
6.27394	475.831	0.00627394
6.26506	476.919	0.00626506
6.27857	478.055	0.00627857
6.29162	479.095	0.00629162
6.30503	480.33	0.00630503
6.31872	481.37	0.00631872
6.33222	482.556	0.00633222
6.34591	483.644	0.00634591
6.35964	484.632	0.00635964
6.37338	485.77	0.00637338
6.38624	486.956	0.00638624
6.40048	487.944	0.00640048
6.41559	489.082	0.00641559
6.42876	490.269	0.00642876
6.44209	491.208	0.00644209
6.45582	492.394	0.00645582
6.47001	493.581	0.00647001
6.48305	494.619	0.00648305
6.49627	495.658	0.00649627
6.50983	496.845	0.00650983
6.52287	497.784	0.00652287
6.53591	499.069	0.00653591
6.54947	500.206	0.00654947
6.56286	500.751	0.00656286
6.5771	502.333	0.0065771
6.59037	503.321	0.00659037
6.60461	504.36	0.00660461
6.61942	505.646	0.00661942
6.63333	506.832	0.00663333
6.64802	507.771	0.00664802
6.66083	508.908	0.00666083
6.67363	509.947	0.00667363
6.68668	511.182	0.00668668
6.69989	512.32	0.00669989
6.71407	513.408	0.00671407
6.72705	514.446	0.00672705
6.74015	515.582	0.00674015
6.7537	516.622	0.0067537
6.76651	517.66	0.00676651
6.77537	518.945	0.00677537
6.78909	520.081	0.00678909
6.80236	521.071	0.00680236
6.81562	522.06	0.00681562
6.82865	523.395	0.00682865
6.84192	524.335	0.00684192
6.85592	525.471	0.00685592
6.86936	526.657	0.00686936
6.88256	527.745	0.00688256
6.89582	528.783	0.00689582
6.91	529.97	0.00691
6.92332	531.108	0.00692332
6.93566	532.196	0.00693566
6.94915	533.284	0.00694915
6.96218	534.271	0.00696218
6.97567	535.458	0.00697567
6.98887	536.596	0.00698887
7.01179	537.238	0.00701179
7.03196	538.772	0.00703196
7.0463	539.858	0.0070463
7.0579	540.898	0.0070579
7.07138	542.133	0.00707138
7.08441	543.221	0.00708441
7.09607	544.21	0.00709607
7.10772	545.445	0.00710772
7.11983	546.533	0.00711983
7.13292	547.671	0.00713292
7.14429	548.759	0.00714429
7.15577	549.845	0.00715577
7.16811	550.984	0.00716811
7.18091	552.072	0.00718091
7.19319	553.011	0.00719319
7.20472	554.248	0.00720472
7.21581	555.285	0.00721581
7.22758	556.373	0.00722758
7.23888	557.51	0.00723888
7.25083	558.499	0.00725083
7.26287	559.487	0.00726287
7.27367	560.971	0.00727367
7.28487	561.862	0.00728487
7.29577	563.048	0.00729577
7.30765	564.283	0.00730765
7.31861	565.272	0.00731861
7.33026	566.509	0.00733026
7.3422	567.497	0.0073422
7.3534	568.635	0.0073534
7.36459	569.723	0.00736459
7.37601	570.859	0.00737601
7.38737	571.748	0.00738737
7.39856	572.985	0.00739856
7.40929	574.222	0.00740929
7.41996	575.209	0.00741996
7.43099	576.396	0.00743099
7.44224	577.385	0.00744224
7.452	578.473	0.007452
7.4612	579.61	0.0074612
7.4721	580.798	0.0074721
7.48244	581.836	0.00748244
7.49248	582.924	0.00749248
7.50224	582.924	0.00750224
7.49219	585.198	0.00749219
7.54044	586.335	0.00754044
7.55042	587.324	0.00755042
7.55955	588.559	0.00755955
7.56839	589.45	0.00756839
7.57866	590.586	0.00757866
7.58763	591.773	0.00758763
7.5966	592.959	0.0075966
7.60795	593.999	0.00760795
7.61822	595.135	0.00761822
7.62785	596.125	0.00762785
7.63825	597.36	0.00763825
7.64705	598.299	0.00764705
7.65657	599.586	0.00765657
7.66753	599.387	0.00766753
7.67679	601.661	0.00767679
7.68723	602.749	0.00768723
7.69718	603.986	0.00769718
7.70656	605.024	0.00770656
7.71612	606.16	0.00771612
7.72535	607.248	0.00772535
7.73507	608.288	0.00773507
7.74504	609.474	0.00774504

## Sheet: 10) Density_Depth_Plot
															Peru Data			897-1 Well			Well 252-1			Well_296-1			Well_Mac1a			Well_Mac1b			All Data				Meters Scale				Porosity Scale
															Bulk Den.	Depth Feet		Density	Depth_Ft		Density	Depth_ft		Density	Depth_ft		Density	Depth_ft		Density	Depth ft		Bulk Den.	Depth Feet	Source		Anchor	Feet	Meters		Anchor	Density	Porosity
															1.37	1.9685		1.2696	1		2.03722	3479		2.23752	7373.9		2.34397	8909		2.19919	13169.3		1.37	1.9685	Peru		2.8	0	0		14000	2.65	0
															1.26	2.00131		1.40797	2		2.11059	3486.5		2.40062	7377.4		2.34942	8916.6		2.2122	12743.6		1.26	2.00131	Peru		2.8	1640.42	500		14000	2.485	0.1
															1.27	2.00131		1.41384	2.8		2.0955	3494.1		2.38427	7377.4		2.32972	8931.8		2.21387	13055.2		1.27	2.00131	Peru		2.8	3280.84	1000		14000	2.32	0.2
															1.3	2.03412		1.45996	2.9		2.16678	3497.8		2.3763	7377.4		2.32175	8939.4		2.21387	13161.7		1.3	2.03412	Peru		2.8	4921.26	1500		14000	2.155	0.3
															1.27	2.7231		1.42767	3		2.15462	3501.6		2.36247	7381.2		2.36326	8984.9		2.22267	13066.6		1.27	2.7231	Peru		2.8	6561.68	2000		14000	1.99	0.4
															1.36	2.98556		1.55178	18		2.18858	3505.3		2.31928	7381.3		2.375	8984.9		2.22897	12736		1.36	2.98556	Peru		2.8	8202.1	2500		14000	1.825	0.5
															1.4	3.37927		1.46792	21.9		2.05189	3505.6		2.28532	7381.4		2.32468	8996.4		2.23609	13047.6		1.4	3.37927	Peru		2.8	9842.52	3000		14000	1.66	0.6
															1.35	3.9042		1.56604	29.3		2.17935	3509.2		2.27609	7381.4		2.3599	9000.1		2.23735	13104.6		1.35	3.9042	Peru		2.8	11482.9	3500		14000	1.495	0.7
															1.4	6.6273		1.53375	29.4		2.13198	3509.3		2.22536	7381.5		2.34145	9004		2.24657	13150.2		1.4	6.6273	Peru		2.8	13123.4	4000		14000	1.33	0.8
															1.22	7.11942		1.63857	36.8		2.24351	3512.8		2.30838	7385.1		2.33349	9080		2.2537	13066.6		1.22	7.11942	Peru						14000	1.165	0.9
															1.48	7.44751		1.68973	44.3		2.08627	3513.1		2.25597	7385.2		2.35193	9110.4		2.25621	13161.6		1.48	7.44751	Peru						14000	1	1
															1.44	7.77559		1.62516	44.4		2.21332	3516.7		2.43123	7388.7		2.36703	9144.5		2.25874	12747.3		1.44	7.77559	Peru
															1.31	7.8084		1.67379	51.9		1.99445	3517.1		2.35115	7388.9		2.32132	9152.2		2.26334	13062.8		1.31	7.8084	Peru
															1.45	11.811		1.73669	63.2		2.01709	3517.1		2.29874	7389		2.32677	9167.4		2.26336	12686.5		1.45	11.811	Peru
															1.6	11.9751		1.70524	67.1		2.22338	3520.5		2.26226	7389		2.33935	9197.8		2.2667	13161.6		1.6	11.9751	Peru
															1.4	12.0079		1.72956	74.6		2.23344	3520.5		2.248	7389.1		2.36157	9209.1		2.27425	13009.5		1.4	12.0079	Peru
															1.41	12.0079		1.71907	89.8		2.06531	3520.8		2.44129	7400.1		2.34648	9216.8		2.27635	12713.1		1.41	12.0079	Peru
															1.3	12.0407		1.65744	90		2.00703	3520.9		2.4111	7404		2.38463	9220.5		2.27927	13172.9		1.3	12.0407	Peru
															1.34	12.4344		1.69518	101.3		2.19613	3524.3		2.29203	7404.2		2.40141	9228.1		2.28389	13020.9		1.34	12.4344	Peru
															1.42	12.4672		1.75723	112.6		2.14246	3524.4		2.4262	7415.3		2.37625	9239.5		2.28557	13089.3		1.42	12.4672	Peru
															1.32	13.4514		1.74004	165.8		2.11688	3528.3		2.39056	7419.2		2.39092	9239.5		2.286	12488.9		1.32	13.4514	Peru
															1.31	13.5827		1.79245	177.1		2.20828	3531.9		2.27022	7419.4		2.40937	9254.7		2.29186	13036.1		1.31	13.5827	Peru
															1.32	14.8294		1.78448	184.7		2.03302	3547.4		2.222	7423.3		2.42279	9269.8		2.29187	12686.5		1.32	14.8294	Peru
															1.5	15.2887		1.76184	192.4		2.07327	3574		2.31425	7430.7		2.34228	9304.2		2.29857	12751.1		1.5	15.2887	Peru
															1.46	17.1588		1.83018	207.4		2.22715	3588.9		2.4937	7434.2		2.39344	9319.3		2.29941	12982.9		1.46	17.1588	Peru
															1.3	17.29		1.81886	211.3		2.20074	3600.3		2.48783	7441.8		2.41147	9326.9		2.30569	13020.9		1.3	17.29	Peru
															1.44	17.4213		1.70356	222.9		2.21667	3604.1		2.38008	7442		2.36996	9353.5		2.30946	13165.3		1.44	17.4213	Peru
															1.57	21.5223		1.92536	230.1		2.23931	3607.9		2.33312	7442.1		2.42153	9383.8		2.31115	12933.5		1.57	21.5223	Peru
															1.48	22.2441		1.80964	237.9		2.16048	3611.8		2.35576	7442.1		2.38547	9391.5		2.31198	13085.5		1.48	22.2441	Peru
															1.42	22.2769		1.85492	241.6		2.18396	3611.8		2.24842	7446.1		2.33473	9391.6		2.3141	12405.2		1.42	22.2769	Peru
															1.4	24.311		1.61928	249.6		2.10136	3619.5		2.36917	7453.4		2.40224	9399.1		2.31535	12709.2		1.4	24.311	Peru
															1.48	24.4094		1.77609	253.1		2.12107	3623.3		2.32263	7457.3		2.41901	9406.7		2.31744	12941		1.48	24.4094	Peru
															1.42	25.164		1.88217	271.9		2.14749	3627		2.30293	7457.4		2.32719	9406.8		2.31745	12500.2		1.42	25.164	Peru
															1.26	25.2953		1.84486	272		2.09046	3627.1		2.40649	7468.6		2.33222	9422		2.32457	12705.4		1.26	25.2953	Peru
															1.45	25.4921		1.79244	275.9		2.01247	3627.3		2.43332	7472.3		2.32509	9429.6		2.33002	12922		1.45	25.4921	Peru
															1.31	26.1155		1.86372	287.2		2.02463	3631.1		2.28028	7472.6		2.34186	9429.6		2.33297	12405.2		1.31	26.1155	Peru
															1.31	28.2152		1.91068	294.7		2.17138	3634.6		2.33898	7483.9		2.35318	9433.4		2.33338	12526.8		1.31	28.2152	Peru
															1.28	28.773		1.89391	302.3		2.137	3634.7		2.41991	7495.1		2.36366	9433.4		2.33462	13089.2		1.28	28.773	Peru
															1.36	28.937		1.75806	317.8		2.0435	3638.6		2.25596	7499.2		2.37876	9437.1		2.33757	12735.8		1.36	28.937	Peru
															1.42	29.8885		1.98238	321.2		2.00283	3638.7		2.21026	7522.1		2.35108	9460		2.34134	12944.8		1.42	29.8885	Peru
															1.23	30.1837		1.93207	325		2.05943	3646.2		2.2199	7529.7		2.36115	9463.8		2.34596	12591.4		1.23	30.1837	Peru
															1.24	30.1837		1.8394	348		2.07872	3665.2		2.20858	7533.5		2.39175	9482.7		2.34931	12675		1.24	30.1837	Peru
															1.41	30.6759		1.87378	367		1.94119	3673		2.37295	7537		2.40308	9501.7		2.34932	12523		1.41	30.6759	Peru
															1.41	33.4974		1.86791	374.6		1.87159	3673.2		2.28909	7541		2.41356	9516.9		2.34972	13051.2		1.41	33.4974	Peru
															1.38	33.727		1.85575	382.2		1.98606	3676.7		2.39391	7548.4		2.38253	9554.9		2.35097	13176.6		1.38	33.727	Peru
															1.48	33.727		1.91445	416.3		1.96971	3680.6		2.36037	7548.5		2.37037	9555		2.35769	12906.8		1.48	33.727	Peru
															1.5	34.6129		1.89852	431.5		1.89381	3680.7		2.34695	7556.1		2.35444	9574		2.35812	12488.7		1.5	34.6129	Peru
															1.39	34.6785		2.04737	446.4		1.92191	3680.7		2.3306	7556.1		2.39469	9585.3		2.36022	12291.1		1.39	34.6785	Peru
															1.4	35.1378		1.97609	461.8		2.24937	3687.6		2.24548	7556.3		2.40978	9611.9		2.36022	12389.9		1.4	35.1378	Peru
															1.63	37.1063		1.96015	461.8		1.99822	3695.7		2.27357	7560		2.36282	9627.2		2.36063	12754.8		1.63	37.1063	Peru
															1.55	39.4357		2.00795	526.3		1.96425	3699.6		2.46267	7567.3		2.37456	9649.9		2.36481	13013.2		1.55	39.4357	Peru
															1.46	39.4685		1.88594	564.5		2.20828	3718.1		2.3851	7567.4		2.34563	9661.4		2.36776	12572.3		1.46	39.4685	Peru
															1.5	41.8635		1.9287	564.5		2.10807	3718.3		2.31131	7567.5		2.3863	9680.3		2.36777	12203.7		1.5	41.8635	Peru
															1.64	41.9619		1.94967	575.8		2.18857	3722		2.4786	7571		2.40055	9684.1		2.36986	12674.9		1.64	41.9619	Peru
															1.52	44.0945		1.99369	579.5		2.15377	3725.8		2.30041	7571.4		2.42319	9706.9		2.37111	12838.3		1.52	44.0945	Peru
															1.31	44.4226		1.87629	602.6		2.17641	3725.8		2.4111	7575		2.34185	9722.2		2.37238	12424.1		1.31	44.4226	Peru
															1.59	44.521		1.90732	613.9		2.09507	3725.9		2.26016	7575.2		2.32466	9729.8		2.37491	12082.1		1.59	44.521	Peru
															1.42	44.7178		1.8591	633		2.16761	3729.6		2.4241	7578.7		2.33598	9745		2.37949	12883.9		1.42	44.7178	Peru
															1.3	45.0131		1.8331	655.9		2.22337	3737.1		2.43584	7586.3		2.38965	9760.1		2.37951	12237.9		1.3	45.0131	Peru
															1.87	45.6365		1.83939	712.8		2.13993	3737.3		2.19978	7605.8		2.3691	9760.2		2.38076	12526.7		1.87	45.6365	Peru
															1.41	45.6365		1.86664	735.6		2.12652	3741.1		2.23122	7613.3		2.41606	9767.7		2.38117	12750.9		1.41	45.6365	Peru
															1.56	47.0144		1.96098	769.6		2.0674	3748.8		2.21697	7620.9		2.40474	9794.3		2.38578	12956.1		1.56	47.0144	Peru
															1.52	47.4409		1.92702	777.3		2.23134	3752.3		2.36707	7651		2.34059	9809.6		2.38705	12621.7		1.52	47.4409	Peru
															1.54	49.7047		1.94421	784.9		2.01792	3752.7		2.35114	7654.9		2.34688	9817.2		2.38748	12325.3		1.54	49.7047	Peru
															1.56	51.8701		1.98111	788.6		2.03511	3752.7		2.30669	7655		2.35107	9840		2.38997	13180.3		1.56	51.8701	Peru
															1.24	53.5433		1.89851	792.5		2.05021	3756.4		2.24087	7658.9		2.36197	9840		2.39126	12093.5		1.24	53.5433	Peru
															1.51	54.3635		1.88509	845.8		2.08459	3756.4		2.32598	7670.1		2.38168	9847.5		2.39167	12424.1		1.51	54.3635	Peru
															1.49	54.6916		1.91444	853.3		2.00828	3794.5		2.43961	7681.3		2.4081	9858.9		2.39459	12709.1		1.49	54.6916	Peru
															1.45	54.9869		1.96643	872.2		2.25817	3797.8		2.20816	7681.8		2.39552	9866.5		2.39629	12161.9		1.45	54.9869	Peru
															1.82	55.4134		1.93792	872.3		2.19989	3801.7		2.37839	7685.2		2.41942	9874.1		2.40005	12515.3		1.82	55.4134	Peru
															1.49	56.0367		1.81339	880.1		2.24266	3813.1		2.40145	7689		2.36491	9881.8		2.40006	12070.6		1.49	56.0367	Peru
															1.81	56.3648		1.9572	940.6		2.14412	3824.7		2.29286	7693		2.37287	9938.8		2.40045	12994.1		1.81	56.3648	Peru
															1.5	56.857		1.96811	944.4		2.12987	3828.5		2.27483	7693		2.42025	9942.5		2.40045	13077.7		1.5	56.857	Peru
															1.73	56.9226		2.06119	978.4		2.23805	3832.1		2.22787	7704.5		2.38839	9942.5		2.40172	12815.5		1.73	56.9226	Peru
															1.54	58.2677		1.90228	990.1		2.17935	3832.2		2.43877	7719.3		2.40138	9972.9		2.40215	12291		1.54	58.2677	Peru
															1.44	58.6942		1.87251	994		2.10262	3832.3		2.41906	7727		2.42822	10010.9		2.40466	12614.1		1.44	58.6942	Peru
															1.24	59.2192		1.94295	1024.3		2.22463	3839.7		2.25135	7731.1		2.4366	10029.9		2.40548	13165.1		1.24	59.2192	Peru
															1.6	59.252		1.97733	1039.4		2.20995	3843.5		2.34359	7738.5		2.37706	10037.6		2.40551	12184.6		1.6	59.252	Peru
															1.31	59.3176		1.99158	1039.4		2.16006	3843.6		2.3134	7746.2		2.36406	10041.4		2.40844	12405		1.31	59.3176	Peru
															1.21	59.3504		1.93079	1039.5		2.05859	3843.8		2.40313	7757.4		2.42235	10060.3		2.40885	12709.1		1.21	59.3504	Peru
															1.2	59.416		1.99913	1062.2		2.08668	3843.8		2.38845	7757.4		2.41102	10064.1		2.41348	12093.4		1.2	59.416	Peru
															1.33	59.416		1.98403	1081.2		2.11435	3847.5		2.3591	7780.3		2.3909	10071.7		2.41389	12515.2		1.33	59.416	Peru
															1.46	61.4173		2.01213	1100.1		1.99737	3851.5		2.33814	7780.3		2.35735	10117.4		2.41555	12906.7		1.46	61.4173	Peru
															1.47	61.9751		2.02345	1122.9		2.0284	3855.3		2.26644	7784.2		2.38377	10125		2.41599	12306.2		1.47	61.9751	Peru
															1.35	62.0735		1.97355	1145.8		2.0741	3862.8		2.42409	7791.5		2.37245	10128.8		2.41933	12595		1.35	62.0735	Peru
															1.37	63.1234		1.94839	1149.7		2.04349	3870.4		2.37545	7791.6		2.40306	10140.1		2.41935	12165.6		1.37	63.1234	Peru
															1.13	65.1247		1.89934	1161.2		1.87704	3874.6		2.28237	7795.6		2.41396	10140.1		2.42017	12796.4		1.13	65.1247	Peru
															1.5	65.1903		2.04609	1168.5		1.8632	3886		2.21277	7799.5		2.39928	10204.7		2.42099	13165.1		1.5	65.1903	Peru
															1.5	66.0433		1.92743	1172.5		2.19192	3889.2		2.31675	7803.2		2.42653	10219.9		2.42228	12393.6		1.5	66.0433	Peru
															1.41	67.8478		2.06244	1179.8		2.20031	3892.9		2.18635	7803.4		2.41395	10219.9		2.42477	12967.4		1.41	67.8478	Peru
															1.49	67.9134		2.00877	1180		1.94664	3893.4		2.29998	7807		2.38628	10223.8		2.42522	12093.4		1.49	67.9134	Peru
															1.53	68.143		2.0855	1195		1.84978	3893.6		2.26183	7807.1		2.42234	10280.7		2.43023	12705.2		1.53	68.143	Peru
															1.36	69.7835		2.10395	1198.8		1.97305	3897.2		2.23793	7814.7		2.39466	10318.7		2.43066	12503.8		1.36	69.7835	Peru
															1.49	70.5709		1.98361	1199		1.88794	3897.3		2.42912	7840.9		2.37999	10349.2		2.4319	13104.2		1.49	70.5709	Peru
															1.51	70.8333		2.03309	1217.9		2.01414	3904.7		2.41109	7852.4		2.4085	10352.9		2.43234	12188.4		1.51	70.8333	Peru
															1.52	71.063		2.07795	1225.4		1.91058	3904.9		2.34736	7860.1		2.43198	10375.7		2.4357	12298.6		1.52	71.063	Peru
															1.59	71.7192		1.96181	1233.2		1.9307	3904.9		2.39348	7863.8		2.44372	10394.7		2.43696	12066.8		1.59	71.7192	Peru
															1.31	75.4921		2.16139	1248.1		1.98731	3916.2		2.36539	7875.3		2.39005	10406.2		2.43945	12823		1.31	75.4921	Peru
															1.37	76.1483		2.09849	1263.4		2.16509	3934.8		2.32849	7879.1		2.42359	10409.9		2.43988	12621.6		1.37	76.1483	Peru
															1.45	76.5748		2.01673	1293.9		2.13909	3942.5		2.30962	7879.2		2.42988	10428.9		2.4407	13172.6		1.45	76.5748	Peru
															1.3	76.8701		1.88592	1294.2		1.96718	3946.6		2.44212	7928.3		2.40221	10493.5		2.44156	12416.4		1.3	76.8701	Peru
															1.56	78.3793		2.04189	1297.7		2.1068	3950.1		2.39977	7943.6		2.41227	10493.5		2.44199	12173.2		1.56	78.3793	Peru
															1.51	80.0197		2.00499	1316.8		2.14957	3957.6		2.42031	7955		2.38334	10493.6		2.4449	12956		1.51	80.0197	Peru
															1.53	80.9711		2.17019	1331.7		2.12022	3957.7		2.38174	7970.2		2.3674	10535.4		2.44616	12853.4		1.53	80.9711	Peru
															1.68	81.2008		1.99702	1358.6		2.07955	3957.8		2.37377	7970.3		2.37872	10546.8		2.44869	12522.8		1.68	81.2008	Peru
															1.55	82.8412		2.0247	1381.3		1.99108	3957.9		2.35616	7977.9		2.39466	10565.8		2.4516	13172.6		1.55	82.8412	Peru
															1.55	83.3333		1.97061	1381.4		2.09381	3961.6		2.32052	7981.8		2.42443	10588.5		2.45163	12287.2		1.55	83.3333	Peru
															1.26	84.8753		1.94797	1404.3		1.8871	3965.7		2.30668	7985.6		2.43281	10603.7		2.45457	12089.5		1.26	84.8753	Peru
															1.43	86.122		2.01254	1419.4		2.05104	3969.2		2.33729	7989.3		2.43197	10687.3		2.45497	12747		1.43	86.122	Peru
															1.88	86.4829		1.93581	1423.3		2.06697	3969.2		2.43205	8004.3		2.42065	10694.9		2.45834	12184.5		1.88	86.4829	Peru
															1.49	86.9094		2.03434	1426.9		1.83301	3969.6		2.25176	8012.3		2.40807	10717.7		2.45999	13130.8		1.49	86.9094	Peru
															1.67	87.5656		1.89514	1434.8		1.82127	3973.5		2.25553	8016.1		2.39675	10721.6		2.46127	12420.1		1.67	87.5656	Peru
															1.26	89.0092		2.05824	1445.9		1.81037	3977.3		2.26517	8016.1		2.40304	10774.8		2.46167	12944.6		1.26	89.0092	Peru
															1.48	89.4685		2.10394	1453.4		2.18521	3980.4		2.28404	8019.8		2.41142	10805.1		2.46168	12644.4		1.48	89.4685	Peru
															1.71	89.6654		1.9857	1453.6		2.02001	3980.7		2.27398	8027.4		2.42358	10820.3		2.46254	12089.5		1.71	89.6654	Peru
															1.35	90.5512		2.12994	1460.9		1.99318	3984.5		2.2941	8027.4		2.41897	10869.7		2.46798	12173.1		1.35	90.5512	Peru
															1.19	90.5512		1.9618	1480.3		2.20408	3987.9		2.43457	8038.5		2.40848	10904		2.46882	12325.1		1.19	90.5512	Peru
															1.41	90.5512		1.92323	1491.7		2.03678	3995.9		2.40521	8061.4		2.39968	10904		2.46963	13165		1.41	90.5512	Peru
															1.9	91.4698		2.02553	1502.9		1.90932	3996.1		2.39054	8088		2.39842	10972.4		2.46965	12560.7		1.9	91.4698	Peru
															1.53	91.6995		1.99828	1503		2.00953	4007.3		2.43414	8091.7		2.42232	11017.9		2.47048	12788.7		1.53	91.6995	Peru
															1.5	92.6837		2.04062	1540.9		1.95502	4022.6		2.34735	8091.9		2.39171	11044.6		2.47218	12097.1		1.5	92.6837	Peru
															1.65	92.7822		1.97857	1548.6		2.0632	4033.8		2.31591	8095.8		2.37745	11059.8		2.47468	12701.3		1.65	92.7822	Peru
															1.43	93.5039		1.93245	1548.7		2.09716	4037.6		2.3289	8107.1		2.40806	11071.2		2.47509	13016.8		1.43	93.5039	Peru
															1.64	94.9803		2.01085	1560		1.97263	4037.8		2.36328	8114.7		2.398	11082.6		2.47636	12446.7		1.64	94.9803	Peru
															1.43	96.7192		1.97605	1605.6		2.1416	4041.3		2.29033	8130		2.42231	11120.5		2.47763	12211.1		1.43	96.7192	Peru
															1.29	97.0801		1.96599	1613.3		2.21162	4048.7		2.41234	8133.6		2.45208	11173.7		2.47972	12351.7		1.29	97.0801	Peru
															1.43	97.605		2.00079	1617		2.15795	4048.8		2.30333	8133.8		2.43237	11181.3		2.48182	12100.9		1.43	97.605	Peru
															1.5	99.0486		1.90729	1621		2.1286	4048.9		2.3767	8156.5		2.4416	11185.1		2.48263	13149.7		1.5	99.0486	Peru
															1.34	101.739		2.06997	1632.1		2.2263	4052.5		2.42073	8167.8		2.40344	11196.6		2.4839	12629.1		1.34	101.739	Peru
															1.52	102.133		2.03475	1632.1		2.04768	4052.8		2.33435	8198.3		2.38499	11211.8		2.48432	12853.3		1.52	102.133	Peru
															1.41	102.395		1.93915	1632.3		2.07368	4052.8		2.39599	8221		2.4177	11215.6		2.48434	12211.1		1.41	102.395	Peru
															1.54	104.265		2.05194	1681.5		2.17431	4056.4		2.27817	8221.2		2.40973	11295.4		2.4881	12473.3		1.54	104.265	Peru
															1.63	105.348		1.95131	1693.1		2.02965	4056.7		2.30961	8221.2		2.42482	11310.5		2.49189	12119.9		1.63	105.348	Peru
															1.27	105.479		2.01966	1696.8		2.08793	4060.4		2.32093	8240.2		2.39589	11318.2		2.49229	12758.3		1.27	105.479	Peru
															1.4	106.529		1.99282	1753.8		2.11435	4064.1		2.35531	8243.9		2.39254	11390.4		2.49356	12359.3		1.4	106.529	Peru
															1.43	108.366		2.04523	1757.5		2.01204	4068.1		2.42366	8247.6		2.44327	11413.1		2.49396	13009.1		1.43	108.366	Peru
															1.39	109.383		1.96557	1772.9		2.19192	4075.4		2.29787	8255.4		2.4265	11424.6		2.49398	12241.5		1.39	109.383	Peru
															1.51	113.091		1.92196	1776.7		2.21624	4079.1		2.43246	8262.8		2.43446	11428.3		2.49521	13218.1		1.51	113.091	Peru
															1.35	113.287		2.03726	1818.3		2.22336	4128.5		2.40982	8274.2		2.4592	11432.1		2.49818	12104.7		1.35	113.287	Peru
															1.72	114.304		2.06242	1841.1		2.20449	4151.4		2.36789	8274.3		2.40553	11432.2		2.499	12545.5		1.72	114.304	Peru
															1.56	114.501		2.0838	1886.6		2.1047	4151.5		2.43791	8289.4		2.4156	11439.8		2.50235	12674.7		1.56	114.501	Peru
															1.99	115.584		2.0142	1928.6		2.09464	4151.6		2.08361	8297.6		2.39547	11443.6		2.50278	12420.1		1.99	115.584	Peru
															1.24	116.535		2.04355	1932.3		2.0829	4155.4		2.19556	8301.2		2.38415	11470.2		2.50318	12887.5		1.24	116.535	Peru
															1.33	117.257		2.0272	1951.4		2.14621	4162.9		2.21695	8301.2		2.42272	11515.8		2.50485	13214.3		1.33	117.257	Peru
															1.65	117.651		2.0012	1955.2		2.13447	4162.9		1.89284	8301.8		2.40008	11538.6		2.50697	12287		1.65	117.651	Peru
															1.45	117.913		2.09428	1958.8		2.12105	4166.7		2.2702	8304.9		2.43446	11557.5		2.50907	12458.1		1.45	117.913	Peru
															1.8	118.045		2.07248	1977.9		2.16634	4170.4		2.24252	8308.7		2.44746	11565.1		2.51031	12796.3		1.8	118.045	Peru
															1.56	119.127					2.0678	4182		2.01233	8309.2		2.4114	11576.6		2.512	12568.3		1.56	119.127	Peru
															1.33	120.177					2.18101	4197		1.92806	8309.3		2.44033	11641.1		2.51324	13096.5		1.33	120.177	Peru
															1.36	121.719					2.20114	4208.4		1.87816	8309.4		2.41685	11645		2.51494	12188.2		1.36	121.719	Peru
															1.48	121.883					2.21497	4223.5		2.38215	8312.3		2.46045	11656.3		2.51786	12963.5		1.48	121.883	Peru
															1.28	123.524					2.22881	4227.3		2.1855	8312.6		2.42733	11675.4		2.52039	12340.2		1.28	123.524	Peru
															1.51	124.147					2.24223	4234.9		2.03581	8312.9		2.45165	11686.7		2.52122	12735.4		1.51	124.147	Peru
															1.65	125.656					2.08877	4235.2		1.97921	8313		2.40804	11713.4		2.52162	13210.5		1.65	125.656	Peru
															1.29	128.215					2.09967	4235.2		2.12806	8316.5		2.42397	11755.2		2.52541	12648		1.29	128.215	Peru
															1.58	128.346					2.23552	4246.3		1.99598	8316.8		2.4332	11759		2.52543	12112.2		1.58	128.346	Peru
															1.35	128.675					2.14118	4246.5		1.94483	8316.9		2.44535	11777.9		2.52749	13206.7		1.35	128.675	Peru
															1.57	128.904					2.11015	4254.1		2.16076	8320.3		2.45542	11823.5		2.52792	12864.6		1.57	128.904	Peru
															1.39	130.184					2.12608	4257.9		1.91296	8320.7		2.4617	11853.9		2.53171	12480.8		1.39	130.184	Peru
															1.47	131.07					2.07535	4258		1.91967	8320.7		2.42145	11884.4		2.53172	12116		1.47	131.07	Peru
															1.78	131.627					2.17304	4261.6		1.93518	8320.7		2.45751	11895.7		2.53379	13073.6		1.78	131.627	Peru
															1.46	132.94					2.15753	4261.7		1.96076	8320.7		2.4399	11922.4		2.53674	12480.8		1.46	132.94	Peru
															1.39	133.53					2.06612	4261.8		1.88613	8320.8		2.42606	11922.4		2.53715	12670.8		1.39	133.53	Peru
															1.48	134.022					2.18939	4273		1.90332	8324.6		2.41894	11926.2		2.54049	13187.6		1.48	134.022	Peru
															1.74	135.597					2.21874	4318.5		1.95405	8328.3		2.40342	11979.4		2.54217	12971		1.74	135.597	Peru
															1.67	138.648					2.20407	4318.6		2.42701	8331.2					2.54512	12750.6		1.67	138.648	Peru
															1.44	138.78					2.23426	4326.1		2.47816	8338.7					2.54931	12891.2		1.44	138.78	Peru
															1.42	139.272					2.06822	4334		2.20395	8339.2					2.54972	13092.6		1.42	139.272	Peru
															1.42	143.766					2.10721	4345.4		2.45636	8342.5					2.55141	12480.8		1.42	143.766	Peru
															1.44	143.799					2.09505	4345.4		2.34441	8346.5					2.55476	12678.4		1.44	143.799	Peru
															1.47	146.621					2.2439	4348.9		2.32554	8346.6					2.55768	13157.2		1.47	146.621	Peru
															1.66	147.146					2.08541	4349.2		1.96663	8347.2					2.55769	12803.8		1.66	147.146	Peru
															1.34	147.671					2.11895	4352.9		2.28781	8350.4					2.56397	13176.2		1.34	147.671	Peru
															1.38	147.769					2.13111	4364.3		2.3985	8357.8					2.56566	12758.2		1.38	147.769	Peru
															1.72	149.409					2.15082	4368.1		2.35783	8357.9					2.56691	13016.6		1.72	149.409	Peru
															1.41	149.803					2.18394	4383.2		2.31296	8361.8					2.57026	13085		1.41	149.803	Peru
															1.32	150.525					2.16759	4383.2		2.41611	8373					2.57321	12845.6		1.32	150.525	Peru
															1.45	151.247					2.19568	4406		2.37334	8403.5					2.57823	13157.2		1.45	151.247	Peru
															1.4	152.723					2.09966	4421.4		2.29242	8411.2					2.57865	12948.2		1.4	152.723	Peru
															1.34	152.822					2.15878	4425.1		2.27858	8418.9					2.57992	12784.7		1.34	152.822	Peru
															1.56	154.134					2.0896	4425.2		2.33141	8426.4								1.56	154.134	Peru
															1.34	154.265					2.25061	4428.7		2.28193	8430.3								1.34	154.265	Peru
															1.42	154.823					2.21161	4428.8		2.35028	8437.7								1.42	154.823	Peru
															1.5	154.987					2.0745	4429		2.39011	8445.2								1.5	154.987	Peru
															1.45	158.596					2.23761	4432.5		2.40185	8452.8								1.45	158.596	Peru
															1.56	159.088					2.22461	4432.5		2.32176	8456.8								1.56	159.088	Peru
															1.43	160.4					2.13949	4432.7		2.3029	8460.6								1.43	160.4	Peru
															1.48	161.056					2.05983	4432.8		2.00269	8465								1.48	161.056	Peru
															1.42	162.369					2.20742	4436.4		2.22239	8472.2								1.42	162.369	Peru
															1.52	164.337					2.11476	4444.1		2.09996	8472.4								1.52	164.337	Peru
															1.46	164.469					2.04725	4444.3		2.12805	8476.1								1.46	164.469	Peru
															1.62	164.6					2.17639	4451.6		2.01652	8476.4								1.62	164.6	Peru
															1.54	165.879					2.04599	4463.3		2.4161	8483.2								1.54	165.879	Peru
															1.45	168.537					2.18813	4466.8		2.36327	8487.1								1.45	168.537	Peru
															1.25	169.39					2.11182	4474.5		2.24084	8494.9								1.25	169.39	Peru
															1.56	169.751					2.14285	4478.3		2.3834	8513.7								1.56	169.751	Peru
															1.49	170.341					2.12775	4478.3		2.27312	8521.5								1.49	170.341	Peru
															1.41	173.688					2.09882	4486		2.31128	8529								1.41	173.688	Peru
															1.31	174.541					2.06402	4486		2.25929	8532.9								1.31	174.541	Peru
															1.5	174.803					2.05605	4486.1		2.15447	8540.7								1.5	174.803	Peru
															1.41	178.871					2.16842	4493.4		2.4182	8547.8								1.41	178.871	Peru
															1.65	179.298					2.15039	4493.5		2.23287	8548.2								1.65	179.298	Peru
															1.35	179.364					2.07786	4497.4		2.34147	8555.5								1.35	179.364	Peru
															1.56	179.659					2.18729	4501		2.39681	8559.2								1.56	179.659	Peru
															1.47	180.577					2.22335	4664.3		2.35866	8559.3								1.47	180.577	Peru
															1.42	180.61					2.22083	4664.4		2.19891	8567.2								1.42	180.61	Peru
															1.5	181.266					2.23131	4675.7		2.18801	8567.2								1.5	181.266	Peru
															1.69	182.349					2.23844	4683.3		2.21149	8571								1.69	182.349	Peru
															1.33	183.858					2.21412	4683.4		2.17543	8571.1								1.33	183.858	Peru
															1.32	184.252					2.24766	4687.1		2.10792	8575								1.32	184.252	Peru
															1.28	184.285					2.19986	4687.2		2.06725	8582.7								1.28	184.285	Peru
															1.29	185.696					2.19316	4691		2.05719	8582.7								1.29	185.696	Peru
															1.42	185.696					2.25353	4721.3		2.11715	8590.2								1.42	185.696	Peru
															1.82	188.091					2.18645	4725.2		2.12679	8597.8								1.82	188.091	Peru
															1.33	189.731					2.26401	4751.7		2.26851	8601.3								1.33	189.731	Peru
															1.85	190.322					2.18016	4751.8		2.09031	8601.6								1.85	190.322	Peru
															1.45	190.715					2.22754	4766.9		2.37585	8608.7								1.45	190.715	Peru
															1.59	191.207					2.23341	4770.7		2.32889	8608.8								1.59	191.207	Peru
															1.49	192.946					2.20992	4778.4		1.99933	8609.4								1.49	192.946	Peru
															1.53	194.849					2.17177	4782.3		1.95698	8613.3								1.53	194.849	Peru
															1.86	199.705					2.24431	4820.1		2.24796	8616.5								1.86	199.705	Peru
															1.72	200.853					2.19693	4835.4		2.03371	8616.9								1.72	200.853	Peru
															1.5	201.312					2.16212	4835.5		2.40855	8623.8								1.5	201.312	Peru
															1.46	202.133					2.09336	4839.4		2.14356	8624.3								1.46	202.133	Peru
															1.72	206.037					2.11055	4847		2.17962	8654.7								1.72	206.037	Peru
															1.57	207.677					2.10552	4847		2.35237	8658.1								1.57	207.677	Peru
															1.66	208.399					2.103	4847		2.28318	8658.3								1.66	208.399	Peru
															1.57	208.465					2.08791	4847		2.16536	8662.3								1.57	208.465	Peru
															1.72	208.76					2.12355	4850.7		2.4249	8665.6								1.72	208.76	Peru
															1.61	209.646					2.25604	4854.3		2.30079	8665.8								1.61	209.646	Peru
															1.29	210.531					2.08288	4854.6		2.39052	8669.5								1.29	210.531	Peru
															1.45	210.761					2.1181	4854.6		2.31547	8669.6								1.45	210.761	Peru
															1.65	211.155					2.14619	4858.3		2.42071	8673.2								1.65	211.155	Peru
															1.3	211.188					2.14074	4858.3		2.36494	8677.1								1.3	211.188	Peru
															1.64	211.385					2.15541	4873.5		2.19471	8677.4								1.64	211.385	Peru
															1.52	214.272					2.13193	4873.5		2.41232	8680.8								1.52	214.272	Peru
															1.78	214.37					2.0812	4885		2.25677	8681.1								1.78	214.37	Peru
															1.28	215.092					2.20782	4892.4		2.22909	8685								1.28	215.092	Peru
															1.26	215.584					2.21789	4892.4		2.34104	8692.4								1.26	215.584	Peru
															1.32	215.65					2.23298	4899.9		2.32763	8692.4								1.32	215.65	Peru
															1.61	215.978					2.18728	4900		2.20561	8707.8								1.61	215.978	Peru
															1.74	216.01					2.25478	4903.7		2.39345	8715.1								1.74	216.01	Peru
															1.72	216.929					2.24556	4918.9		2.14733	8715.5								1.72	216.929	Peru
															1.61	218.11					2.09923	4930.6		2.10624	8719.4								1.61	218.11	Peru
															1.34	219.915					2.23005	4941.8		2.08779	8723.2								1.34	219.915	Peru
															1.46	221.293					2.18015	4964.6		2.37207	8737.9								1.46	221.293	Peru
															1.42	222.146					2.19986	4972.2		2.38088	8737.9								1.42	222.146	Peru
															1.49	224.081					2.07533	4976.2		2.28863	8738.1								1.49	224.081	Peru
															1.67	225.361					2.08204	4976.2		2.35739	8753.1								1.67	225.361	Peru
															2.09	225.951					2.16212	4983.7		2.21568	8757.2								2.09	225.951	Peru
															1.46	227.461					2.14157	4983.7		2.22532	8757.2								1.46	227.461	Peru
															1.7	227.592					2.11767	4983.8		2.23874	8761								1.7	227.592	Peru
															1.41	227.92					2.09252	4999		2.27354	8764.7								1.41	227.92	Peru
															1.38	227.986					2.11013	4999		2.30792	8776								1.38	227.986	Peru
															1.47	231.66					2.24136	5010.1		2.32259	8776								1.47	231.66	Peru
															1.5	232.841					2.22166	5014		2.25131	8779.9								1.5	232.841	Peru
															1.27	232.907					2.21453	5059.6		2.33559	8787.4								1.27	232.907	Peru
															1.38	234.252					2.19105	5063.4		2.2966	8791.2								1.38	234.252	Peru
															1.53	236.713					2.12941	5063.5		2.26431	8795.1								1.53	236.713	Peru
															1.48	239.961					2.25226	5067.1		2.34775	8802.6								1.48	239.961	Peru
															1.34	241.404					2.16966	5067.3											1.34	241.404	Peru
															1.3	241.47					2.1487	5071.1											1.3	241.47	Peru
															1.44	241.995					2.25352	5086.1											1.44	241.995	Peru
															1.66	242.29					2.25771	5089.9											1.66	242.29	Peru
															1.67	243.865					2.20572	5097.6											1.67	243.865	Peru
															1.55	244.587					2.23214	5131.8											1.55	244.587	Peru
															1.37	245.636					2.18392	5131.9											1.37	245.636	Peru
															1.49	246.096					2.26694	5146.9											1.49	246.096	Peru
															1.34	246.129					2.28287	5162.1											1.34	246.129	Peru
															1.29	246.785					2.23968	5169.7											1.29	246.785	Peru
															1.32	247.113					2.20362	5169.8											1.32	247.113	Peru
															1.37	247.539					2.22333	5173.6											1.37	247.539	Peru
															1.7	248.622					2.25855	5188.7											1.7	248.622	Peru
															1.61	250.328					2.1793	5211.7											1.61	250.328	Peru
															1.31	251.706					2.29251	5215.2											1.31	251.706	Peru
															1.45	252.198					2.18391	5238.3											1.45	252.198	Peru
															1.57	252.625					2.21201	5261											1.57	252.625	Peru
															1.53	254.823					2.19523	5268.6											1.53	254.823	Peru
															1.67	254.888					2.2489	5272.3											1.67	254.888	Peru
															1.58	258.629					2.26861	5272.3											1.58	258.629	Peru
															1.51	260.367					2.22962	5272.4											1.51	260.367	Peru
															1.4	261.647					2.28203	5291.3											1.4	261.647	Peru
															1.53	262.828					2.29502	5321.7											1.53	262.828	Peru
															1.62	263.058					2.29418	5359.7											1.62	263.058	Peru
															1.64	264.436					2.27406	5363.5											1.64	264.436	Peru
															1.64	269.783					2.25184	5367.3											1.64	269.783	Peru
															1.47	271.621					2.2619	5371.1											1.47	271.621	Peru
															1.31	272.539					2.28244	5371.1											1.31	272.539	Peru
															1.43	272.867					2.24093	5409.2											1.43	272.867	Peru
															1.41	272.999					2.2967	5443.3											1.41	272.999	Peru
															1.34	273.458					2.26986	5481.3											1.34	273.458	Peru
															1.58	274.475					2.23296	5492.8											1.58	274.475	Peru
															1.62	274.508					2.27867	5500.3											1.62	274.508	Peru
															1.35	275.689					2.25602	5507.9											1.35	275.689	Peru
															1.6	276.739					2.29963	5530.7											1.6	276.739	Peru
															1.38	277.329					2.29669	5576.3											1.38	277.329	Peru
															1.63	278.904					2.13275	5580.4											1.63	278.904	Peru
															1.61	279.068					2.24344	5584											1.61	279.068	Peru
															1.72	280.61					2.19858	5591.6											1.72	280.61	Peru
															1.59	283.432					2.16126	5591.7											1.59	283.432	Peru
															1.62	283.465					2.21367	5595.4											1.62	283.465	Peru
															1.33	284.121					2.22625	5595.4											1.33	284.121	Peru
															1.51	287.106					2.11137	5595.6											1.51	287.106	Peru
															1.57	287.959					2.08537	5595.7											1.57	287.959	Peru
															1.5	293.209					2.18474	5599.3											1.5	293.209	Peru
															1.5	293.34					2.28579	5602.9											1.5	293.34	Peru
															1.46	293.602					2.10088	5603.2											1.46	293.602	Peru
															1.72	294.948					2.26399	5606.7											1.72	294.948	Peru
															1.51	297.572					2.17216	5606.9											1.51	297.572	Peru
															1.47	301.739					2.27154	5610.5											1.47	301.739	Peru
															1.49	302.034					2.1403	5610.8											1.49	302.034	Peru
															1.45	303.084					2.12311	5626											1.45	303.084	Peru
															1.4	308.169					2.3013	5633.3											1.4	308.169	Peru
															1.64	308.268					2.1164	5637.4											1.64	308.268	Peru
															1.77	308.99					2.15371	5641.1											1.77	308.99	Peru
															1.65	309.613					2.20319	5675.2											1.65	309.613	Peru
															1.38	314.797					2.14784	5683											1.38	314.797	Peru
															1.61	319.16					2.26105	5686.5											1.61	319.16	Peru
															1.51	319.357					2.24931	5686.6											1.51	319.357	Peru
															1.74	319.619					2.27782	5690.3											1.74	319.619	Peru
															1.54	320.341					2.31388	5694											1.54	320.341	Peru
															1.42	326.575					2.23589	5698											1.42	326.575	Peru
															1.52	331.923					2.22038	5698											1.52	331.923	Peru
															1.52	334.154					2.18851	5698.1											1.52	334.154	Peru
															1.76	334.974					2.17887	5705.7											1.76	334.974	Peru
															1.46	335.072					2.29417	5709.3											1.46	335.072	Peru
															1.81	338.419					2.17048	5732.3											1.81	338.419	Peru
															1.43	339.272					2.15832	5736.1											1.43	339.272	Peru
															1.9	339.665					2.15581	5747.5											1.9	339.665	Peru
															1.51	341.437					2.32897	5766.2											1.51	341.437	Peru
															1.38	343.602					2.21115	5774											1.38	343.602	Peru
															1.37	343.701					2.25266	5774											1.37	343.701	Peru
															1.47	343.799					2.24302	5777.8											1.47	343.799	Peru
															1.54	346.293					2.3013	5781.5											1.54	346.293	Peru
															1.64	346.949					2.19522	5781.7											1.64	346.949	Peru
															1.6	351.181					2.16461	5789.3											1.6	351.181	Peru
															1.89	351.312					2.31388	5792.8											1.89	351.312	Peru
															1.42	360.302					2.22834	5793											1.42	360.302	Peru
															2	362.697					2.1839	5793.1											2	362.697	Peru
															1.69	364.895					2.26943	5796.7											1.69	364.895	Peru
															2	368.93					2.28495	5804.3											2	368.93	Peru
															1.34	371.424					2.34281	5819.4											1.34	371.424	Peru
															1.59	375.164					2.35874	5819.4											1.59	375.164	Peru
															1.43	375.262					2.2732	5884.1											1.43	375.262	Peru
															1.54	378.084					2.18809	5891.9											1.54	378.084	Peru
															1.62	378.117					2.23589	5899.4											1.62	378.117	Peru
															1.25	384.81					2.25937	5903.2											1.25	384.81	Peru
															1.63	385.236					2.31974	5910.6											1.63	385.236	Peru
															1.58	386.024					2.30591	5910.7											1.58	386.024	Peru
															1.3	390.748					2.2187	5910.8											1.3	390.748	Peru
															1.35	394.587					2.29207	5918.3											1.35	394.587	Peru
															1.75	395.768					2.33903	5937.2											1.75	395.768	Peru
															1.54	397.244					2.18725	5971.7											1.54	397.244	Peru
															1.65	398.819					2.17593	5971.7											1.65	398.819	Peru
															1.66	399.705					2.32687	5979											1.66	399.705	Peru
															1.42	399.836					2.26775	5979.1											1.42	399.836	Peru
															1.54	402.756					2.15706	5979.3											1.54	402.756	Peru
															1.63	404.199					2.13526	5979.4											1.63	404.199	Peru
															1.48	407.218					2.19605	5983.1											1.48	407.218	Peru
															1.41	409.449					2.12477	5983.2											1.41	409.449	Peru
															1.44	411.581					2.20779	5986.9											1.44	411.581	Peru
															1.58	412.073					2.16796	5986.9											1.58	412.073	Peru
															1.46	414.829					2.31219	5994.3											1.46	414.829	Peru
															1.52	417.257					2.24846	5994.4											1.52	417.257	Peru
															1.38	419.062					2.28159	5998.1											1.38	419.062	Peru
															1.41	423.622					2.29584	5998.1											1.41	423.622	Peru
															1.36	424.639					2.2275	5998.2											1.36	424.639	Peru
															1.48	427.559					2.32813	6062.6											1.48	427.559	Peru
															1.57	428.281					2.26313	6089.4											1.57	428.281	Peru
															1.33	430.217					2.28661	6104.5											1.33	430.217	Peru
															1.49	433.005					2.30506	6112.1											1.49	433.005	Peru
															1.58	435.827					2.25097	6119.8											1.58	435.827	Peru
															1.36	439.567					2.2732	6123.5											1.36	439.567	Peru
															1.4	444.718					2.32267	6134.8											1.4	444.718	Peru
															1.4	447.933					2.3407	6153.8											1.4	447.933	Peru
															1.51	455.151					2.3386	6165.2											1.51	455.151	Peru
															1.67	456.529					2.22749	6188.2											1.67	456.529	Peru
															1.58	458.858					2.27781	6191.9											1.58	458.858	Peru
															1.62	459.449					2.31219	6191.9											1.62	459.449	Peru
															1.59	462.27					2.25852	6195.8											1.59	462.27	Peru
															1.58	462.5					2.29374	6199.5											1.58	462.5	Peru
															1.51	469.619					2.24259	6203.4											1.51	469.619	Peru
															1.43	469.882					2.21869	6203.4											1.43	469.882	Peru
															1.71	470.735					2.20359	6218.7											1.71	470.735	Peru
															1.38	472.047					2.3277	6226											1.38	472.047	Peru
															1.53	479.396					2.34741	6229.8											1.53	479.396	Peru
															1.37	481.135					2.18892	6233.9											1.37	481.135	Peru
															1.58	483.596					2.12854	6234											1.58	483.596	Peru
															1.34	484.81					2.11848	6234											1.34	484.81	Peru
															1.4	488.517					2.16795	6237.7											1.4	488.517	Peru
															1.79	500.886					2.1495	6241.6											1.79	500.886	Peru
															1.54	501.509					2.1407	6241.6											1.54	501.509	Peru
															1.53	502.69					2.35957	6279.2											1.53	502.69	Peru
															1.71	506.824					2.23546	6283.2											1.71	506.824	Peru
															1.56	509.941					2.21198	6302.3											1.56	509.941	Peru
															1.69	510.892					2.269	6309.8											1.69	510.892	Peru
															1.34	517.946					2.35202	6313.4											1.34	517.946	Peru
															1.38	518.077					2.25432	6317.4											1.38	518.077	Peru
															1.76	520.21					2.28787	6321.1											1.76	520.21	Peru
															1.53	520.505					2.30296	6324.9											1.53	520.505	Peru
															1.49	520.669					2.32183	6328.7											1.49	520.669	Peru
															1.33	521.03					2.3755	6332.4											1.33	521.03	Peru
															1.29	527.297					2.22413	6332.6											1.29	527.297	Peru
															1.4	529.856					2.32938	6336.2											1.4	529.856	Peru
															1.49	529.987					2.36963	6355.2											1.49	529.987	Peru
															1.37	531.135					2.24468	6355.4											1.37	531.135	Peru
															1.43	533.202					2.21072	6363.1											1.43	533.202	Peru
															1.46	533.957					2.38682	6366.5											1.46	533.957	Peru
															1.45	536.549					2.19814	6378.3											1.45	536.549	Peru
															1.44	537.664					2.3973	6381.7											1.44	537.664	Peru
															1.62	538.451					2.27487	6381.9											1.62	538.451	Peru
															1.5	541.47					2.2887	6404.7											1.5	541.47	Peru
															1.49	546.424					2.30631	6419.9											1.49	546.424	Peru
															1.41	556.496					2.25516	6420											1.41	556.496	Peru
															1.6	558.825					2.3822	6423.5											1.6	558.825	Peru
															1.33	559.383					2.33147	6427.4											1.33	559.383	Peru
															1.43	563.32					2.23419	6431.4											1.43	563.32	Peru
															1.58	563.648					2.34489	6435											1.58	563.648	Peru
															1.61	568.11					2.40988	6450.1											1.61	568.11	Peru
															1.62	570.407					2.25725	6458											1.62	570.407	Peru
															1.32	571.129					2.36375	6469.2											1.32	571.129	Peru
															1.57	576.017					2.23503	6473.2											1.57	576.017	Peru
															1.68	578.642					2.28409	6476.9											1.68	578.642	Peru
															1.56	588.845					2.29205	6495.9											1.56	588.845	Peru
															1.54	591.962					2.39855	6499.5											1.54	591.962	Peru
															2.05	593.537					2.31763	6507.3											2.05	593.537	Peru
															1.5	595.407					2.37088	6518.6											1.5	595.407	Peru
															1.43	599.738					2.46103	6533.6											1.43	599.738	Peru
															1.52	604.724					2.44929	6537.4											1.52	604.724	Peru
															1.42	606.463					2.443	6537.4											1.42	606.463	Peru
															1.52	607.579					2.4191	6537.5											1.52	607.579	Peru
															1.52	607.94					2.42581	6548.9											1.52	607.94	Peru
															1.41	615.978					2.35075	6552.8											1.41	615.978	Peru
															1.52	625.722					2.33566	6552.8											1.52	625.722	Peru
															1.4	625.919					2.23167	6560.6											1.4	625.919	Peru
															1.46	627.1					2.204	6572.1											1.46	627.1	Peru
															1.56	628.314					2.38429	6579.4											1.56	628.314	Peru
															1.6	632.316					2.30756	6594.7											1.6	632.316	Peru
															1.51	632.677					2.37423	6598.4											1.51	632.677	Peru
															1.61	651.444					2.18723	6598.7											1.61	651.444	Peru
															2.04	652.329					2.2975	6602.3											2.04	652.329	Peru
															1.55	656.266					2.21532	6606.3											1.55	656.266	Peru
															1.55	657.677					2.27025	6617.6											1.55	657.677	Peru
															1.61	659.35					2.17507	6617.8											1.61	659.35	Peru
															1.54	660.433					2.40148	6621.1											1.54	660.433	Peru
															1.52	662.336					2.34614	6621.2											1.52	662.336	Peru
															1.51	662.369					2.15494	6625.4											1.51	662.369	Peru
															1.47	669.882					2.16584	6625.4											1.47	669.882	Peru
															1.51	671.752					2.13985	6636.8											1.51	671.752	Peru
															1.55	689.304					2.25809	6640.4											1.55	689.304	Peru
															1.52	689.501					2.12769	6644.4											1.52	689.501	Peru
															1.55	694.849					2.23712	6648											1.55	694.849	Peru
															1.59	714.829					2.07318	6652.1											1.59	714.829	Peru
															1.35	719.882					2.06102	6652.2											1.35	719.882	Peru
															1.53	720.735					2.08408	6655.9											1.53	720.735	Peru
															1.54	751.509					2.10337	6659.7											1.54	751.509	Peru
															1.45	756.332					2.11595	6663.5											1.45	756.332	Peru
															1.39	760.433					2.19813	6667.1											1.39	760.433	Peru
															1.6	761.549					2.09498	6667.3											1.6	761.549	Peru
															1.61	776.28					2.05263	6667.4											1.61	776.28	Peru
															1.33	784.055					2.38974	6674.3											1.33	784.055	Peru
															1.76	797.572					2.32685	6685.9											1.76	797.572	Peru
															1.45	798.163					2.26689	6693.6											1.45	798.163	Peru
															1.61	826.411					2.27947	6693.6											1.61	826.411	Peru
															1.7	839.37					2.30463	6704.9											1.7	839.37	Peru
															1.61	852.428					2.2237	6708.9											1.61	852.428	Peru
															1.76	865.814					2.36207	6723.8											1.76	865.814	Peru
															1.53	878.051					2.38219	6731.4											1.53	878.051	Peru
															1.64	881.004					2.4019	6754.1											1.64	881.004	Peru
															1.63	881.102					2.31427	6780.9											1.63	881.102	Peru
															1.54	884.055					2.33607	6788.5											1.54	884.055	Peru
															1.73	891.076					2.29791	6792.3											1.73	891.076	Peru
															1.61	902.198					2.35284	6811.2											1.61	902.198	Peru
															1.8	922.244					2.37129	6818.8											1.8	922.244	Peru
															1.57	931.955					2.39519	6826.3											1.57	931.955	Peru
															1.8	953.412					2.3172	6860.7											1.8	953.412	Peru
															1.66	967.454					2.26102	6860.8											1.66	967.454	Peru
															1.63	976.608					2.24424	6864.6											1.63	976.608	Peru
															1.63	984.58					2.1977	6864.7											1.63	984.58	Peru
															1.59	990.387					2.1738	6872.4											1.59	990.387	Peru
															1.68	1002.69					2.18135	6872.4											1.68	1002.69	Peru
															1.52	1009.94					2.24802	6879.8											1.52	1009.94	Peru
															1.69	1010.73					2.28953	6883.6											1.69	1010.73	Peru
															1.86	1015.81					2.36248	6891											1.86	1015.81	Peru
															1.46	1016.96					2.34487	6894.8											1.46	1016.96	Peru
															1.92	1022.6					2.23628	6898.9											1.92	1022.6	Peru
															2.01	1032.58					2.31007	6902.5											2.01	1032.58	Peru
															1.68	1046.92					2.32978	6906.3											1.68	1046.92	Peru
															2	1054.36					2.3868	6913.8											2	1054.36	Peru
															1.57	1058.53					2.32265	6986.1											1.57	1058.53	Peru
															2.31	1063.12					2.35787	7005											2.31	1063.12	Peru
															1.5	1083.14					2.33774	7005.1											1.5	1083.14	Peru
															1.59	1087.99					2.37757	7012.6											1.59	1087.99	Peru
															1.83	1088.91					2.28659	7039.4											1.83	1088.91	Peru
															1.76	1109.25					2.30378	7046.9											1.76	1109.25	Peru
															1.45	1112.3					2.39392	7077.2											1.45	1112.3	Peru
															2	1116.34					2.29539	7100.2											2	1116.34	Peru
															1.77	1172.08					2.37296	7107.6											1.77	1172.08	Peru
															2	1187.66					2.31258	7107.7											2	1187.66	Peru
															1.82	1201.15					2.39853	7115.2											1.82	1201.15	Peru
															1.67	1208.99					2.35325	7141.8											1.67	1208.99	Peru
															1.84	1265.09					2.25472	7142											1.84	1265.09	Peru
															1.46	1267.91					2.26478	7161											1.46	1267.91	Peru
															1.71	1281.33					2.3369	7164.7											1.71	1281.33	Peru
															1.93	1289.27					2.32348	7179.9											1.93	1289.27	Peru
															1.77	1296.33					2.38553	7191.2											1.77	1296.33	Peru
															1.9	1350.39					2.28197	7191.4											1.9	1350.39	Peru
															1.8	1352.85					2.25765	7214.2											1.8	1352.85	Peru
															1.71	1364.67					2.27274	7225.6											1.71	1364.67	Peru
															1.66	1370.67					2.36289	7236.8											1.66	1370.67	Peru
															1.89	1374.93					2.29203	7240.8											1.89	1374.93	Peru
															1.77	1380.28					2.37589	7252											1.77	1380.28	Peru
															1.78	1381.56					2.33102	7255.9											1.78	1381.56	Peru
															1.68	1407.51					2.40985	7259.5											1.68	1407.51	Peru
															1.82	1412.73					2.39476	7267.2											1.82	1412.73	Peru
															1.83	1417.45					2.30796	7267.3											1.83	1417.45	Peru
															1.8	1443.9					2.34276	7274.9											1.8	1443.9	Peru
															2.06	1478.97					2.23543	7316.9											2.06	1478.97	Peru
															1.5	1487.17					2.22536	7328.3											1.5	1487.17	Peru
															1.56	1550.52					2.08909	7328.6											1.56	1550.52	Peru
															2.09	1823.82					2.13983	7332.3											2.09	1823.82	Peru
															1.76	1885.43					1.99308	7332.5											1.76	1885.43	Peru
																					2.2132	7335.9											1.2696	1	897-1
																					2.19056	7336											1.40797	2	897-1
																					2.01446	7336.3											1.41384	2.8	897-1
																					1.86771	7336.6											1.45996	2.9	897-1
																					1.85681	7336.6											1.42767	3	897-1
																					1.82284	7336.7											1.55178	18	897-1
																					2.03542	7340.1											1.46792	21.9	897-1
																					1.95115	7340.2											1.56604	29.3	897-1
																					1.93563	7340.2											1.53375	29.4	897-1
																					1.89328	7340.3											1.63857	36.8	897-1
																					1.84423	7340.4											1.68973	44.3	897-1
																					1.81152	7340.5											1.62516	44.4	897-1
																					2.18301	7343.6											1.67379	51.9	897-1
																					2.07484	7351.4											1.73669	63.2	897-1
																					1.88406	7363.1											1.70524	67.1	897-1
																																	1.72956	74.6	897-1
																																	1.71907	89.8	897-1
																																	1.65744	90	897-1
																																	1.69518	101.3	897-1
																																	1.75723	112.6	897-1
																																	1.74004	165.8	897-1
																																	1.79245	177.1	897-1
																																	1.78448	184.7	897-1
																																	1.76184	192.4	897-1
																																	1.83018	207.4	897-1
																																	1.81886	211.3	897-1
																																	1.70356	222.9	897-1
																																	1.92536	230.1	897-1
																																	1.80964	237.9	897-1
																																	1.85492	241.6	897-1
																																	1.61928	249.6	897-1
																																	1.77609	253.1	897-1
																																	1.88217	271.9	897-1
																																	1.84486	272	897-1
																																	1.79244	275.9	897-1
																																	1.86372	287.2	897-1
																																	1.91068	294.7	897-1
																																	1.89391	302.3	897-1
																																	1.75806	317.8	897-1
																																	1.98238	321.2	897-1
																																	1.93207	325	897-1
																																	1.8394	348	897-1
																																	1.87378	367	897-1
																																	1.86791	374.6	897-1
																																	1.85575	382.2	897-1
																																	1.91445	416.3	897-1
																																	1.89852	431.5	897-1
																																	2.04737	446.4	897-1
																																	1.97609	461.8	897-1
																																	1.96015	461.8	897-1
																																	2.00795	526.3	897-1
																																	1.88594	564.5	897-1
																																	1.9287	564.5	897-1
																																	1.94967	575.8	897-1
																																	1.99369	579.5	897-1
																																	1.87629	602.6	897-1
																																	1.90732	613.9	897-1
																																	1.8591	633	897-1
																																	1.8331	655.9	897-1
																																	1.83939	712.8	897-1
																																	1.86664	735.6	897-1
																																	1.96098	769.6	897-1
																																	1.92702	777.3	897-1
																																	1.94421	784.9	897-1
																																	1.98111	788.6	897-1
																																	1.89851	792.5	897-1
																																	1.88509	845.8	897-1
																																	1.91444	853.3	897-1
																																	1.96643	872.2	897-1
																																	1.93792	872.3	897-1
																																	1.81339	880.1	897-1
																																	1.9572	940.6	897-1
																																	1.96811	944.4	897-1
																																	2.06119	978.4	897-1
																																	1.90228	990.1	897-1
																																	1.87251	994	897-1
																																	1.94295	1024.3	897-1
																																	1.97733	1039.4	897-1
																																	1.99158	1039.4	897-1
																																	1.93079	1039.5	897-1
																																	1.99913	1062.2	897-1
																																	1.98403	1081.2	897-1
																																	2.01213	1100.1	897-1
																																	2.02345	1122.9	897-1
																																	1.97355	1145.8	897-1
																																	1.94839	1149.7	897-1
																																	1.89934	1161.2	897-1
																																	2.04609	1168.5	897-1
																																	1.92743	1172.5	897-1
																																	2.06244	1179.8	897-1
																																	2.00877	1180	897-1
																																	2.0855	1195	897-1
																																	2.10395	1198.8	897-1
																																	1.98361	1199	897-1
																																	2.03309	1217.9	897-1
																																	2.07795	1225.4	897-1
																																	1.96181	1233.2	897-1
																																	2.16139	1248.1	897-1
																																	2.09849	1263.4	897-1
																																	2.01673	1293.9	897-1
																																	1.88592	1294.2	897-1
																																	2.04189	1297.7	897-1
																																	2.00499	1316.8	897-1
																																	2.17019	1331.7	897-1
																																	1.99702	1358.6	897-1
																																	2.0247	1381.3	897-1
																																	1.97061	1381.4	897-1
																																	1.94797	1404.3	897-1
																																	2.01254	1419.4	897-1
																																	1.93581	1423.3	897-1
																																	2.03434	1426.9	897-1
																																	1.89514	1434.8	897-1
																																	2.05824	1445.9	897-1
																																	2.10394	1453.4	897-1
																																	1.9857	1453.6	897-1
																																	2.12994	1460.9	897-1
																																	1.9618	1480.3	897-1
																																	1.92323	1491.7	897-1
																																	2.02553	1502.9	897-1
																																	1.99828	1503	897-1
																																	2.04062	1540.9	897-1
																																	1.97857	1548.6	897-1
																																	1.93245	1548.7	897-1
																																	2.01085	1560	897-1
																																	1.97605	1605.6	897-1
																																	1.96599	1613.3	897-1
																																	2.00079	1617	897-1
																																	1.90729	1621	897-1
																																	2.06997	1632.1	897-1
																																	2.03475	1632.1	897-1
																																	1.93915	1632.3	897-1
																																	2.05194	1681.5	897-1
																																	1.95131	1693.1	897-1
																																	2.01966	1696.8	897-1
																																	1.99282	1753.8	897-1
																																	2.04523	1757.5	897-1
																																	1.96557	1772.9	897-1
																																	1.92196	1776.7	897-1
																																	2.03726	1818.3	897-1
																																	2.06242	1841.1	897-1
																																	2.0838	1886.6	897-1
																																	2.0142	1928.6	897-1
																																	2.04355	1932.3	897-1
																																	2.0272	1951.4	897-1
																																	2.0012	1955.2	897-1
																																	2.09428	1958.8	897-1
																																	2.07248	1977.9	897-1
																																	2.03722	3479	Well 252-1
																																	2.11059	3486.5	Well 252-1
																																	2.0955	3494.1	Well 252-1
																																	2.16678	3497.8	Well 252-1
																																	2.15462	3501.6	Well 252-1
																																	2.18858	3505.3	Well 252-1
																																	2.05189	3505.6	Well 252-1
																																	2.17935	3509.2	Well 252-1
																																	2.13198	3509.3	Well 252-1
																																	2.24351	3512.8	Well 252-1
																																	2.08627	3513.1	Well 252-1
																																	2.21332	3516.7	Well 252-1
																																	1.99445	3517.1	Well 252-1
																																	2.01709	3517.1	Well 252-1
																																	2.22338	3520.5	Well 252-1
																																	2.23344	3520.5	Well 252-1
																																	2.06531	3520.8	Well 252-1
																																	2.00703	3520.9	Well 252-1
																																	2.19613	3524.3	Well 252-1
																																	2.14246	3524.4	Well 252-1
																																	2.11688	3528.3	Well 252-1
																																	2.20828	3531.9	Well 252-1
																																	2.03302	3547.4	Well 252-1
																																	2.07327	3574	Well 252-1
																																	2.22715	3588.9	Well 252-1
																																	2.20074	3600.3	Well 252-1
																																	2.21667	3604.1	Well 252-1
																																	2.23931	3607.9	Well 252-1
																																	2.16048	3611.8	Well 252-1
																																	2.18396	3611.8	Well 252-1
																																	2.10136	3619.5	Well 252-1
																																	2.12107	3623.3	Well 252-1
																																	2.14749	3627	Well 252-1
																																	2.09046	3627.1	Well 252-1
																																	2.01247	3627.3	Well 252-1
																																	2.02463	3631.1	Well 252-1
																																	2.17138	3634.6	Well 252-1
																																	2.137	3634.7	Well 252-1
																																	2.0435	3638.6	Well 252-1
																																	2.00283	3638.7	Well 252-1
																																	2.05943	3646.2	Well 252-1
																																	2.07872	3665.2	Well 252-1
																																	1.94119	3673	Well 252-1
																																	1.87159	3673.2	Well 252-1
																																	1.98606	3676.7	Well 252-1
																																	1.96971	3680.6	Well 252-1
																																	1.89381	3680.7	Well 252-1
																																	1.92191	3680.7	Well 252-1
																																	2.24937	3687.6	Well 252-1
																																	1.99822	3695.7	Well 252-1
																																	1.96425	3699.6	Well 252-1
																																	2.20828	3718.1	Well 252-1
																																	2.10807	3718.3	Well 252-1
																																	2.18857	3722	Well 252-1
																																	2.15377	3725.8	Well 252-1
																																	2.17641	3725.8	Well 252-1
																																	2.09507	3725.9	Well 252-1
																																	2.16761	3729.6	Well 252-1
																																	2.22337	3737.1	Well 252-1
																																	2.13993	3737.3	Well 252-1
																																	2.12652	3741.1	Well 252-1
																																	2.0674	3748.8	Well 252-1
																																	2.23134	3752.3	Well 252-1
																																	2.01792	3752.7	Well 252-1
																																	2.03511	3752.7	Well 252-1
																																	2.05021	3756.4	Well 252-1
																																	2.08459	3756.4	Well 252-1
																																	2.00828	3794.5	Well 252-1
																																	2.25817	3797.8	Well 252-1
																																	2.19989	3801.7	Well 252-1
																																	2.24266	3813.1	Well 252-1
																																	2.14412	3824.7	Well 252-1
																																	2.12987	3828.5	Well 252-1
																																	2.23805	3832.1	Well 252-1
																																	2.17935	3832.2	Well 252-1
																																	2.10262	3832.3	Well 252-1
																																	2.22463	3839.7	Well 252-1
																																	2.20995	3843.5	Well 252-1
																																	2.16006	3843.6	Well 252-1
																																	2.05859	3843.8	Well 252-1
																																	2.08668	3843.8	Well 252-1
																																	2.11435	3847.5	Well 252-1
																																	1.99737	3851.5	Well 252-1
																																	2.0284	3855.3	Well 252-1
																																	2.0741	3862.8	Well 252-1
																																	2.04349	3870.4	Well 252-1
																																	1.87704	3874.6	Well 252-1
																																	1.8632	3886	Well 252-1
																																	2.19192	3889.2	Well 252-1
																																	2.20031	3892.9	Well 252-1
																																	1.94664	3893.4	Well 252-1
																																	1.84978	3893.6	Well 252-1
																																	1.97305	3897.2	Well 252-1
																																	1.88794	3897.3	Well 252-1
																																	2.01414	3904.7	Well 252-1
																																	1.91058	3904.9	Well 252-1
																																	1.9307	3904.9	Well 252-1
																																	1.98731	3916.2	Well 252-1
																																	2.16509	3934.8	Well 252-1
																																	2.13909	3942.5	Well 252-1
																																	1.96718	3946.6	Well 252-1
																																	2.1068	3950.1	Well 252-1
																																	2.14957	3957.6	Well 252-1
																																	2.12022	3957.7	Well 252-1
																																	2.07955	3957.8	Well 252-1
																																	1.99108	3957.9	Well 252-1
																																	2.09381	3961.6	Well 252-1
																																	1.8871	3965.7	Well 252-1
																																	2.05104	3969.2	Well 252-1
																																	2.06697	3969.2	Well 252-1
																																	1.83301	3969.6	Well 252-1
																																	1.82127	3973.5	Well 252-1
																																	1.81037	3977.3	Well 252-1
																																	2.18521	3980.4	Well 252-1
																																	2.02001	3980.7	Well 252-1
																																	1.99318	3984.5	Well 252-1
																																	2.20408	3987.9	Well 252-1
																																	2.03678	3995.9	Well 252-1
																																	1.90932	3996.1	Well 252-1
																																	2.00953	4007.3	Well 252-1
																																	1.95502	4022.6	Well 252-1
																																	2.0632	4033.8	Well 252-1
																																	2.09716	4037.6	Well 252-1
																																	1.97263	4037.8	Well 252-1
																																	2.1416	4041.3	Well 252-1
																																	2.21162	4048.7	Well 252-1
																																	2.15795	4048.8	Well 252-1
																																	2.1286	4048.9	Well 252-1
																																	2.2263	4052.5	Well 252-1
																																	2.04768	4052.8	Well 252-1
																																	2.07368	4052.8	Well 252-1
																																	2.17431	4056.4	Well 252-1
																																	2.02965	4056.7	Well 252-1
																																	2.08793	4060.4	Well 252-1
																																	2.11435	4064.1	Well 252-1
																																	2.01204	4068.1	Well 252-1
																																	2.19192	4075.4	Well 252-1
																																	2.21624	4079.1	Well 252-1
																																	2.22336	4128.5	Well 252-1
																																	2.20449	4151.4	Well 252-1
																																	2.1047	4151.5	Well 252-1
																																	2.09464	4151.6	Well 252-1
																																	2.0829	4155.4	Well 252-1
																																	2.14621	4162.9	Well 252-1
																																	2.13447	4162.9	Well 252-1
																																	2.12105	4166.7	Well 252-1
																																	2.16634	4170.4	Well 252-1
																																	2.0678	4182	Well 252-1
																																	2.18101	4197	Well 252-1
																																	2.20114	4208.4	Well 252-1
																																	2.21497	4223.5	Well 252-1
																																	2.22881	4227.3	Well 252-1
																																	2.24223	4234.9	Well 252-1
																																	2.08877	4235.2	Well 252-1
																																	2.09967	4235.2	Well 252-1
																																	2.23552	4246.3	Well 252-1
																																	2.14118	4246.5	Well 252-1
																																	2.11015	4254.1	Well 252-1
																																	2.12608	4257.9	Well 252-1
																																	2.07535	4258	Well 252-1
																																	2.17304	4261.6	Well 252-1
																																	2.15753	4261.7	Well 252-1
																																	2.06612	4261.8	Well 252-1
																																	2.18939	4273	Well 252-1
																																	2.21874	4318.5	Well 252-1
																																	2.20407	4318.6	Well 252-1
																																	2.23426	4326.1	Well 252-1
																																	2.06822	4334	Well 252-1
																																	2.10721	4345.4	Well 252-1
																																	2.09505	4345.4	Well 252-1
																																	2.2439	4348.9	Well 252-1
																																	2.08541	4349.2	Well 252-1
																																	2.11895	4352.9	Well 252-1
																																	2.13111	4364.3	Well 252-1
																																	2.15082	4368.1	Well 252-1
																																	2.18394	4383.2	Well 252-1
																																	2.16759	4383.2	Well 252-1
																																	2.19568	4406	Well 252-1
																																	2.09966	4421.4	Well 252-1
																																	2.15878	4425.1	Well 252-1
																																	2.0896	4425.2	Well 252-1
																																	2.25061	4428.7	Well 252-1
																																	2.21161	4428.8	Well 252-1
																																	2.0745	4429	Well 252-1
																																	2.23761	4432.5	Well 252-1
																																	2.22461	4432.5	Well 252-1
																																	2.13949	4432.7	Well 252-1
																																	2.05983	4432.8	Well 252-1
																																	2.20742	4436.4	Well 252-1
																																	2.11476	4444.1	Well 252-1
																																	2.04725	4444.3	Well 252-1
																																	2.17639	4451.6	Well 252-1
																																	2.04599	4463.3	Well 252-1
																																	2.18813	4466.8	Well 252-1
																																	2.11182	4474.5	Well 252-1
																																	2.14285	4478.3	Well 252-1
																																	2.12775	4478.3	Well 252-1
																																	2.09882	4486	Well 252-1
																																	2.06402	4486	Well 252-1
																																	2.05605	4486.1	Well 252-1
																																	2.16842	4493.4	Well 252-1
																																	2.15039	4493.5	Well 252-1
																																	2.07786	4497.4	Well 252-1
																																	2.18729	4501	Well 252-1
																																	2.22335	4664.3	Well 252-1
																																	2.22083	4664.4	Well 252-1
																																	2.23131	4675.7	Well 252-1
																																	2.23844	4683.3	Well 252-1
																																	2.21412	4683.4	Well 252-1
																																	2.24766	4687.1	Well 252-1
																																	2.19986	4687.2	Well 252-1
																																	2.19316	4691	Well 252-1
																																	2.25353	4721.3	Well 252-1
																																	2.18645	4725.2	Well 252-1
																																	2.26401	4751.7	Well 252-1
																																	2.18016	4751.8	Well 252-1
																																	2.22754	4766.9	Well 252-1
																																	2.23341	4770.7	Well 252-1
																																	2.20992	4778.4	Well 252-1
																																	2.17177	4782.3	Well 252-1
																																	2.24431	4820.1	Well 252-1
																																	2.19693	4835.4	Well 252-1
																																	2.16212	4835.5	Well 252-1
																																	2.09336	4839.4	Well 252-1
																																	2.11055	4847	Well 252-1
																																	2.10552	4847	Well 252-1
																																	2.103	4847	Well 252-1
																																	2.08791	4847	Well 252-1
																																	2.12355	4850.7	Well 252-1
																																	2.25604	4854.3	Well 252-1
																																	2.08288	4854.6	Well 252-1
																																	2.1181	4854.6	Well 252-1
																																	2.14619	4858.3	Well 252-1
																																	2.14074	4858.3	Well 252-1
																																	2.15541	4873.5	Well 252-1
																																	2.13193	4873.5	Well 252-1
																																	2.0812	4885	Well 252-1
																																	2.20782	4892.4	Well 252-1
																																	2.21789	4892.4	Well 252-1
																																	2.23298	4899.9	Well 252-1
																																	2.18728	4900	Well 252-1
																																	2.25478	4903.7	Well 252-1
																																	2.24556	4918.9	Well 252-1
																																	2.09923	4930.6	Well 252-1
																																	2.23005	4941.8	Well 252-1
																																	2.18015	4964.6	Well 252-1
																																	2.19986	4972.2	Well 252-1
																																	2.07533	4976.2	Well 252-1
																																	2.08204	4976.2	Well 252-1
																																	2.16212	4983.7	Well 252-1
																																	2.14157	4983.7	Well 252-1
																																	2.11767	4983.8	Well 252-1
																																	2.09252	4999	Well 252-1
																																	2.11013	4999	Well 252-1
																																	2.24136	5010.1	Well 252-1
																																	2.22166	5014	Well 252-1
																																	2.21453	5059.6	Well 252-1
																																	2.19105	5063.4	Well 252-1
																																	2.12941	5063.5	Well 252-1
																																	2.25226	5067.1	Well 252-1
																																	2.16966	5067.3	Well 252-1
																																	2.1487	5071.1	Well 252-1
																																	2.25352	5086.1	Well 252-1
																																	2.25771	5089.9	Well 252-1
																																	2.20572	5097.6	Well 252-1
																																	2.23214	5131.8	Well 252-1
																																	2.18392	5131.9	Well 252-1
																																	2.26694	5146.9	Well 252-1
																																	2.28287	5162.1	Well 252-1
																																	2.23968	5169.7	Well 252-1
																																	2.20362	5169.8	Well 252-1
																																	2.22333	5173.6	Well 252-1
																																	2.25855	5188.7	Well 252-1
																																	2.1793	5211.7	Well 252-1
																																	2.29251	5215.2	Well 252-1
																																	2.18391	5238.3	Well 252-1
																																	2.21201	5261	Well 252-1
																																	2.19523	5268.6	Well 252-1
																																	2.2489	5272.3	Well 252-1
																																	2.26861	5272.3	Well 252-1
																																	2.22962	5272.4	Well 252-1
																																	2.28203	5291.3	Well 252-1
																																	2.29502	5321.7	Well 252-1
																																	2.29418	5359.7	Well 252-1
																																	2.27406	5363.5	Well 252-1
																																	2.25184	5367.3	Well 252-1
																																	2.2619	5371.1	Well 252-1
																																	2.28244	5371.1	Well 252-1
																																	2.24093	5409.2	Well 252-1
																																	2.2967	5443.3	Well 252-1
																																	2.26986	5481.3	Well 252-1
																																	2.23296	5492.8	Well 252-1
																																	2.27867	5500.3	Well 252-1
																																	2.25602	5507.9	Well 252-1
																																	2.29963	5530.7	Well 252-1
																																	2.29669	5576.3	Well 252-1
																																	2.13275	5580.4	Well 252-1
																																	2.24344	5584	Well 252-1
																																	2.19858	5591.6	Well 252-1
																																	2.16126	5591.7	Well 252-1
																																	2.21367	5595.4	Well 252-1
																																	2.22625	5595.4	Well 252-1
																																	2.11137	5595.6	Well 252-1
																																	2.08537	5595.7	Well 252-1
																																	2.18474	5599.3	Well 252-1
																																	2.28579	5602.9	Well 252-1
																																	2.10088	5603.2	Well 252-1
																																	2.26399	5606.7	Well 252-1
																																	2.17216	5606.9	Well 252-1
																																	2.27154	5610.5	Well 252-1
																																	2.1403	5610.8	Well 252-1
																																	2.12311	5626	Well 252-1
																																	2.3013	5633.3	Well 252-1
																																	2.1164	5637.4	Well 252-1
																																	2.15371	5641.1	Well 252-1
																																	2.20319	5675.2	Well 252-1
																																	2.14784	5683	Well 252-1
																																	2.26105	5686.5	Well 252-1
																																	2.24931	5686.6	Well 252-1
																																	2.27782	5690.3	Well 252-1
																																	2.31388	5694	Well 252-1
																																	2.23589	5698	Well 252-1
																																	2.22038	5698	Well 252-1
																																	2.18851	5698.1	Well 252-1
																																	2.17887	5705.7	Well 252-1
																																	2.29417	5709.3	Well 252-1
																																	2.17048	5732.3	Well 252-1
																																	2.15832	5736.1	Well 252-1
																																	2.15581	5747.5	Well 252-1
																																	2.32897	5766.2	Well 252-1
																																	2.21115	5774	Well 252-1
																																	2.25266	5774	Well 252-1
																																	2.24302	5777.8	Well 252-1
																																	2.3013	5781.5	Well 252-1
																																	2.19522	5781.7	Well 252-1
																																	2.16461	5789.3	Well 252-1
																																	2.31388	5792.8	Well 252-1
																																	2.22834	5793	Well 252-1
																																	2.1839	5793.1	Well 252-1
																																	2.26943	5796.7	Well 252-1
																																	2.28495	5804.3	Well 252-1
																																	2.34281	5819.4	Well 252-1
																																	2.35874	5819.4	Well 252-1
																																	2.2732	5884.1	Well 252-1
																																	2.18809	5891.9	Well 252-1
																																	2.23589	5899.4	Well 252-1
																																	2.25937	5903.2	Well 252-1
																																	2.31974	5910.6	Well 252-1
																																	2.30591	5910.7	Well 252-1
																																	2.2187	5910.8	Well 252-1
																																	2.29207	5918.3	Well 252-1
																																	2.33903	5937.2	Well 252-1
																																	2.18725	5971.7	Well 252-1
																																	2.17593	5971.7	Well 252-1
																																	2.32687	5979	Well 252-1
																																	2.26775	5979.1	Well 252-1
																																	2.15706	5979.3	Well 252-1
																																	2.13526	5979.4	Well 252-1
																																	2.19605	5983.1	Well 252-1
																																	2.12477	5983.2	Well 252-1
																																	2.20779	5986.9	Well 252-1
																																	2.16796	5986.9	Well 252-1
																																	2.31219	5994.3	Well 252-1
																																	2.24846	5994.4	Well 252-1
																																	2.28159	5998.1	Well 252-1
																																	2.29584	5998.1	Well 252-1
																																	2.2275	5998.2	Well 252-1
																																	2.32813	6062.6	Well 252-1
																																	2.26313	6089.4	Well 252-1
																																	2.28661	6104.5	Well 252-1
																																	2.30506	6112.1	Well 252-1
																																	2.25097	6119.8	Well 252-1
																																	2.2732	6123.5	Well 252-1
																																	2.32267	6134.8	Well 252-1
																																	2.3407	6153.8	Well 252-1
																																	2.3386	6165.2	Well 252-1
																																	2.22749	6188.2	Well 252-1
																																	2.27781	6191.9	Well 252-1
																																	2.31219	6191.9	Well 252-1
																																	2.25852	6195.8	Well 252-1
																																	2.29374	6199.5	Well 252-1
																																	2.24259	6203.4	Well 252-1
																																	2.21869	6203.4	Well 252-1
																																	2.20359	6218.7	Well 252-1
																																	2.3277	6226	Well 252-1
																																	2.34741	6229.8	Well 252-1
																																	2.18892	6233.9	Well 252-1
																																	2.12854	6234	Well 252-1
																																	2.11848	6234	Well 252-1
																																	2.16795	6237.7	Well 252-1
																																	2.1495	6241.6	Well 252-1
																																	2.1407	6241.6	Well 252-1
																																	2.35957	6279.2	Well 252-1
																																	2.23546	6283.2	Well 252-1
																																	2.21198	6302.3	Well 252-1
																																	2.269	6309.8	Well 252-1
																																	2.35202	6313.4	Well 252-1
																																	2.25432	6317.4	Well 252-1
																																	2.28787	6321.1	Well 252-1
																																	2.30296	6324.9	Well 252-1
																																	2.32183	6328.7	Well 252-1
																																	2.3755	6332.4	Well 252-1
																																	2.22413	6332.6	Well 252-1
																																	2.32938	6336.2	Well 252-1
																																	2.36963	6355.2	Well 252-1
																																	2.24468	6355.4	Well 252-1
																																	2.21072	6363.1	Well 252-1
																																	2.38682	6366.5	Well 252-1
																																	2.19814	6378.3	Well 252-1
																																	2.3973	6381.7	Well 252-1
																																	2.27487	6381.9	Well 252-1
																																	2.2887	6404.7	Well 252-1
																																	2.30631	6419.9	Well 252-1
																																	2.25516	6420	Well 252-1
																																	2.3822	6423.5	Well 252-1
																																	2.33147	6427.4	Well 252-1
																																	2.23419	6431.4	Well 252-1
																																	2.34489	6435	Well 252-1
																																	2.40988	6450.1	Well 252-1
																																	2.25725	6458	Well 252-1
																																	2.36375	6469.2	Well 252-1
																																	2.23503	6473.2	Well 252-1
																																	2.28409	6476.9	Well 252-1
																																	2.29205	6495.9	Well 252-1
																																	2.39855	6499.5	Well 252-1
																																	2.31763	6507.3	Well 252-1
																																	2.37088	6518.6	Well 252-1
																																	2.46103	6533.6	Well 252-1
																																	2.44929	6537.4	Well 252-1
																																	2.443	6537.4	Well 252-1
																																	2.4191	6537.5	Well 252-1
																																	2.42581	6548.9	Well 252-1
																																	2.35075	6552.8	Well 252-1
																																	2.33566	6552.8	Well 252-1
																																	2.23167	6560.6	Well 252-1
																																	2.204	6572.1	Well 252-1
																																	2.38429	6579.4	Well 252-1
																																	2.30756	6594.7	Well 252-1
																																	2.37423	6598.4	Well 252-1
																																	2.18723	6598.7	Well 252-1
																																	2.2975	6602.3	Well 252-1
																																	2.21532	6606.3	Well 252-1
																																	2.27025	6617.6	Well 252-1
																																	2.17507	6617.8	Well 252-1
																																	2.40148	6621.1	Well 252-1
																																	2.34614	6621.2	Well 252-1
																																	2.15494	6625.4	Well 252-1
																																	2.16584	6625.4	Well 252-1
																																	2.13985	6636.8	Well 252-1
																																	2.25809	6640.4	Well 252-1
																																	2.12769	6644.4	Well 252-1
																																	2.23712	6648	Well 252-1
																																	2.07318	6652.1	Well 252-1
																																	2.06102	6652.2	Well 252-1
																																	2.08408	6655.9	Well 252-1
																																	2.10337	6659.7	Well 252-1
																																	2.11595	6663.5	Well 252-1
																																	2.19813	6667.1	Well 252-1
																																	2.09498	6667.3	Well 252-1
																																	2.05263	6667.4	Well 252-1
																																	2.38974	6674.3	Well 252-1
																																	2.32685	6685.9	Well 252-1
																																	2.26689	6693.6	Well 252-1
																																	2.27947	6693.6	Well 252-1
																																	2.30463	6704.9	Well 252-1
																																	2.2237	6708.9	Well 252-1
																																	2.36207	6723.8	Well 252-1
																																	2.38219	6731.4	Well 252-1
																																	2.4019	6754.1	Well 252-1
																																	2.31427	6780.9	Well 252-1
																																	2.33607	6788.5	Well 252-1
																																	2.29791	6792.3	Well 252-1
																																	2.35284	6811.2	Well 252-1
																																	2.37129	6818.8	Well 252-1
																																	2.39519	6826.3	Well 252-1
																																	2.3172	6860.7	Well 252-1
																																	2.26102	6860.8	Well 252-1
																																	2.24424	6864.6	Well 252-1
																																	2.1977	6864.7	Well 252-1
																																	2.1738	6872.4	Well 252-1
																																	2.18135	6872.4	Well 252-1
																																	2.24802	6879.8	Well 252-1
																																	2.28953	6883.6	Well 252-1
																																	2.36248	6891	Well 252-1
																																	2.34487	6894.8	Well 252-1
																																	2.23628	6898.9	Well 252-1
																																	2.31007	6902.5	Well 252-1
																																	2.32978	6906.3	Well 252-1
																																	2.3868	6913.8	Well 252-1
																																	2.32265	6986.1	Well 252-1
																																	2.35787	7005	Well 252-1
																																	2.33774	7005.1	Well 252-1
																																	2.37757	7012.6	Well 252-1
																																	2.28659	7039.4	Well 252-1
																																	2.30378	7046.9	Well 252-1
																																	2.39392	7077.2	Well 252-1
																																	2.29539	7100.2	Well 252-1
																																	2.37296	7107.6	Well 252-1
																																	2.31258	7107.7	Well 252-1
																																	2.39853	7115.2	Well 252-1
																																	2.35325	7141.8	Well 252-1
																																	2.25472	7142	Well 252-1
																																	2.26478	7161	Well 252-1
																																	2.3369	7164.7	Well 252-1
																																	2.32348	7179.9	Well 252-1
																																	2.38553	7191.2	Well 252-1
																																	2.28197	7191.4	Well 252-1
																																	2.25765	7214.2	Well 252-1
																																	2.27274	7225.6	Well 252-1
																																	2.36289	7236.8	Well 252-1
																																	2.29203	7240.8	Well 252-1
																																	2.37589	7252	Well 252-1
																																	2.33102	7255.9	Well 252-1
																																	2.40985	7259.5	Well 252-1
																																	2.39476	7267.2	Well 252-1
																																	2.30796	7267.3	Well 252-1
																																	2.34276	7274.9	Well 252-1
																																	2.23543	7316.9	Well 252-1
																																	2.22536	7328.3	Well 252-1
																																	2.08909	7328.6	Well 252-1
																																	2.13983	7332.3	Well 252-1
																																	1.99308	7332.5	Well 252-1
																																	2.2132	7335.9	Well 252-1
																																	2.19056	7336	Well 252-1
																																	2.01446	7336.3	Well 252-1
																																	1.86771	7336.6	Well 252-1
																																	1.85681	7336.6	Well 252-1
																																	1.82284	7336.7	Well 252-1
																																	2.03542	7340.1	Well 252-1
																																	1.95115	7340.2	Well 252-1
																																	1.93563	7340.2	Well 252-1
																																	1.89328	7340.3	Well 252-1
																																	1.84423	7340.4	Well 252-1
																																	1.81152	7340.5	Well 252-1
																																	2.18301	7343.6	Well 252-1
																																	2.07484	7351.4	Well 252-1
																																	1.88406	7363.1	Well 252-1
																																	2.23752	7373.9	Well_296-1
																																	2.40062	7377.4	Well_296-1
																																	2.38427	7377.4	Well_296-1
																																	2.3763	7377.4	Well_296-1
																																	2.36247	7381.2	Well_296-1
																																	2.31928	7381.3	Well_296-1
																																	2.28532	7381.4	Well_296-1
																																	2.27609	7381.4	Well_296-1
																																	2.22536	7381.5	Well_296-1
																																	2.30838	7385.1	Well_296-1
																																	2.25597	7385.2	Well_296-1
																																	2.43123	7388.7	Well_296-1
																																	2.35115	7388.9	Well_296-1
																																	2.29874	7389	Well_296-1
																																	2.26226	7389	Well_296-1
																																	2.248	7389.1	Well_296-1
																																	2.44129	7400.1	Well_296-1
																																	2.4111	7404	Well_296-1
																																	2.29203	7404.2	Well_296-1
																																	2.4262	7415.3	Well_296-1
																																	2.39056	7419.2	Well_296-1
																																	2.27022	7419.4	Well_296-1
																																	2.222	7423.3	Well_296-1
																																	2.31425	7430.7	Well_296-1
																																	2.4937	7434.2	Well_296-1
																																	2.48783	7441.8	Well_296-1
																																	2.38008	7442	Well_296-1
																																	2.33312	7442.1	Well_296-1
																																	2.35576	7442.1	Well_296-1
																																	2.24842	7446.1	Well_296-1
																																	2.36917	7453.4	Well_296-1
																																	2.32263	7457.3	Well_296-1
																																	2.30293	7457.4	Well_296-1
																																	2.40649	7468.6	Well_296-1
																																	2.43332	7472.3	Well_296-1
																																	2.28028	7472.6	Well_296-1
																																	2.33898	7483.9	Well_296-1
																																	2.41991	7495.1	Well_296-1
																																	2.25596	7499.2	Well_296-1
																																	2.21026	7522.1	Well_296-1
																																	2.2199	7529.7	Well_296-1
																																	2.20858	7533.5	Well_296-1
																																	2.37295	7537	Well_296-1
																																	2.28909	7541	Well_296-1
																																	2.39391	7548.4	Well_296-1
																																	2.36037	7548.5	Well_296-1
																																	2.34695	7556.1	Well_296-1
																																	2.3306	7556.1	Well_296-1
																																	2.24548	7556.3	Well_296-1
																																	2.27357	7560	Well_296-1
																																	2.46267	7567.3	Well_296-1
																																	2.3851	7567.4	Well_296-1
																																	2.31131	7567.5	Well_296-1
																																	2.4786	7571	Well_296-1
																																	2.30041	7571.4	Well_296-1
																																	2.4111	7575	Well_296-1
																																	2.26016	7575.2	Well_296-1
																																	2.4241	7578.7	Well_296-1
																																	2.43584	7586.3	Well_296-1
																																	2.19978	7605.8	Well_296-1
																																	2.23122	7613.3	Well_296-1
																																	2.21697	7620.9	Well_296-1
																																	2.36707	7651	Well_296-1
																																	2.35114	7654.9	Well_296-1
																																	2.30669	7655	Well_296-1
																																	2.24087	7658.9	Well_296-1
																																	2.32598	7670.1	Well_296-1
																																	2.43961	7681.3	Well_296-1
																																	2.20816	7681.8	Well_296-1
																																	2.37839	7685.2	Well_296-1
																																	2.40145	7689	Well_296-1
																																	2.29286	7693	Well_296-1
																																	2.27483	7693	Well_296-1
																																	2.22787	7704.5	Well_296-1
																																	2.43877	7719.3	Well_296-1
																																	2.41906	7727	Well_296-1
																																	2.25135	7731.1	Well_296-1
																																	2.34359	7738.5	Well_296-1
																																	2.3134	7746.2	Well_296-1
																																	2.40313	7757.4	Well_296-1
																																	2.38845	7757.4	Well_296-1
																																	2.3591	7780.3	Well_296-1
																																	2.33814	7780.3	Well_296-1
																																	2.26644	7784.2	Well_296-1
																																	2.42409	7791.5	Well_296-1
																																	2.37545	7791.6	Well_296-1
																																	2.28237	7795.6	Well_296-1
																																	2.21277	7799.5	Well_296-1
																																	2.31675	7803.2	Well_296-1
																																	2.18635	7803.4	Well_296-1
																																	2.29998	7807	Well_296-1
																																	2.26183	7807.1	Well_296-1
																																	2.23793	7814.7	Well_296-1
																																	2.42912	7840.9	Well_296-1
																																	2.41109	7852.4	Well_296-1
																																	2.34736	7860.1	Well_296-1
																																	2.39348	7863.8	Well_296-1
																																	2.36539	7875.3	Well_296-1
																																	2.32849	7879.1	Well_296-1
																																	2.30962	7879.2	Well_296-1
																																	2.44212	7928.3	Well_296-1
																																	2.39977	7943.6	Well_296-1
																																	2.42031	7955	Well_296-1
																																	2.38174	7970.2	Well_296-1
																																	2.37377	7970.3	Well_296-1
																																	2.35616	7977.9	Well_296-1
																																	2.32052	7981.8	Well_296-1
																																	2.30668	7985.6	Well_296-1
																																	2.33729	7989.3	Well_296-1
																																	2.43205	8004.3	Well_296-1
																																	2.25176	8012.3	Well_296-1
																																	2.25553	8016.1	Well_296-1
																																	2.26517	8016.1	Well_296-1
																																	2.28404	8019.8	Well_296-1
																																	2.27398	8027.4	Well_296-1
																																	2.2941	8027.4	Well_296-1
																																	2.43457	8038.5	Well_296-1
																																	2.40521	8061.4	Well_296-1
																																	2.39054	8088	Well_296-1
																																	2.43414	8091.7	Well_296-1
																																	2.34735	8091.9	Well_296-1
																																	2.31591	8095.8	Well_296-1
																																	2.3289	8107.1	Well_296-1
																																	2.36328	8114.7	Well_296-1
																																	2.29033	8130	Well_296-1
																																	2.41234	8133.6	Well_296-1
																																	2.30333	8133.8	Well_296-1
																																	2.3767	8156.5	Well_296-1
																																	2.42073	8167.8	Well_296-1
																																	2.33435	8198.3	Well_296-1
																																	2.39599	8221	Well_296-1
																																	2.27817	8221.2	Well_296-1
																																	2.30961	8221.2	Well_296-1
																																	2.32093	8240.2	Well_296-1
																																	2.35531	8243.9	Well_296-1
																																	2.42366	8247.6	Well_296-1
																																	2.29787	8255.4	Well_296-1
																																	2.43246	8262.8	Well_296-1
																																	2.40982	8274.2	Well_296-1
																																	2.36789	8274.3	Well_296-1
																																	2.43791	8289.4	Well_296-1
																																	2.08361	8297.6	Well_296-1
																																	2.19556	8301.2	Well_296-1
																																	2.21695	8301.2	Well_296-1
																																	1.89284	8301.8	Well_296-1
																																	2.2702	8304.9	Well_296-1
																																	2.24252	8308.7	Well_296-1
																																	2.01233	8309.2	Well_296-1
																																	1.92806	8309.3	Well_296-1
																																	1.87816	8309.4	Well_296-1
																																	2.38215	8312.3	Well_296-1
																																	2.1855	8312.6	Well_296-1
																																	2.03581	8312.9	Well_296-1
																																	1.97921	8313	Well_296-1
																																	2.12806	8316.5	Well_296-1
																																	1.99598	8316.8	Well_296-1
																																	1.94483	8316.9	Well_296-1
																																	2.16076	8320.3	Well_296-1
																																	1.91296	8320.7	Well_296-1
																																	1.91967	8320.7	Well_296-1
																																	1.93518	8320.7	Well_296-1
																																	1.96076	8320.7	Well_296-1
																																	1.88613	8320.8	Well_296-1
																																	1.90332	8324.6	Well_296-1
																																	1.95405	8328.3	Well_296-1
																																	2.42701	8331.2	Well_296-1
																																	2.47816	8338.7	Well_296-1
																																	2.20395	8339.2	Well_296-1
																																	2.45636	8342.5	Well_296-1
																																	2.34441	8346.5	Well_296-1
																																	2.32554	8346.6	Well_296-1
																																	1.96663	8347.2	Well_296-1
																																	2.28781	8350.4	Well_296-1
																																	2.3985	8357.8	Well_296-1
																																	2.35783	8357.9	Well_296-1
																																	2.31296	8361.8	Well_296-1
																																	2.41611	8373	Well_296-1
																																	2.37334	8403.5	Well_296-1
																																	2.29242	8411.2	Well_296-1
																																	2.27858	8418.9	Well_296-1
																																	2.33141	8426.4	Well_296-1
																																	2.28193	8430.3	Well_296-1
																																	2.35028	8437.7	Well_296-1
																																	2.39011	8445.2	Well_296-1
																																	2.40185	8452.8	Well_296-1
																																	2.32176	8456.8	Well_296-1
																																	2.3029	8460.6	Well_296-1
																																	2.00269	8465	Well_296-1
																																	2.22239	8472.2	Well_296-1
																																	2.09996	8472.4	Well_296-1
																																	2.12805	8476.1	Well_296-1
																																	2.01652	8476.4	Well_296-1
																																	2.4161	8483.2	Well_296-1
																																	2.36327	8487.1	Well_296-1
																																	2.24084	8494.9	Well_296-1
																																	2.3834	8513.7	Well_296-1
																																	2.27312	8521.5	Well_296-1
																																	2.31128	8529	Well_296-1
																																	2.25929	8532.9	Well_296-1
																																	2.15447	8540.7	Well_296-1
																																	2.4182	8547.8	Well_296-1
																																	2.23287	8548.2	Well_296-1
																																	2.34147	8555.5	Well_296-1
																																	2.39681	8559.2	Well_296-1
																																	2.35866	8559.3	Well_296-1
																																	2.19891	8567.2	Well_296-1
																																	2.18801	8567.2	Well_296-1
																																	2.21149	8571	Well_296-1
																																	2.17543	8571.1	Well_296-1
																																	2.10792	8575	Well_296-1
																																	2.06725	8582.7	Well_296-1
																																	2.05719	8582.7	Well_296-1
																																	2.11715	8590.2	Well_296-1
																																	2.12679	8597.8	Well_296-1
																																	2.26851	8601.3	Well_296-1
																																	2.09031	8601.6	Well_296-1
																																	2.37585	8608.7	Well_296-1
																																	2.32889	8608.8	Well_296-1
																																	1.99933	8609.4	Well_296-1
																																	1.95698	8613.3	Well_296-1
																																	2.24796	8616.5	Well_296-1
																																	2.03371	8616.9	Well_296-1
																																	2.40855	8623.8	Well_296-1
																																	2.14356	8624.3	Well_296-1
																																	2.17962	8654.7	Well_296-1
																																	2.35237	8658.1	Well_296-1
																																	2.28318	8658.3	Well_296-1
																																	2.16536	8662.3	Well_296-1
																																	2.4249	8665.6	Well_296-1
																																	2.30079	8665.8	Well_296-1
																																	2.39052	8669.5	Well_296-1
																																	2.31547	8669.6	Well_296-1
																																	2.42071	8673.2	Well_296-1
																																	2.36494	8677.1	Well_296-1
																																	2.19471	8677.4	Well_296-1
																																	2.41232	8680.8	Well_296-1
																																	2.25677	8681.1	Well_296-1
																																	2.22909	8685	Well_296-1
																																	2.34104	8692.4	Well_296-1
																																	2.32763	8692.4	Well_296-1
																																	2.20561	8707.8	Well_296-1
																																	2.39345	8715.1	Well_296-1
																																	2.14733	8715.5	Well_296-1
																																	2.10624	8719.4	Well_296-1
																																	2.08779	8723.2	Well_296-1
																																	2.37207	8737.9	Well_296-1
																																	2.38088	8737.9	Well_296-1
																																	2.28863	8738.1	Well_296-1
																																	2.35739	8753.1	Well_296-1
																																	2.21568	8757.2	Well_296-1
																																	2.22532	8757.2	Well_296-1
																																	2.23874	8761	Well_296-1
																																	2.27354	8764.7	Well_296-1
																																	2.30792	8776	Well_296-1
																																	2.32259	8776	Well_296-1
																																	2.25131	8779.9	Well_296-1
																																	2.33559	8787.4	Well_296-1
																																	2.2966	8791.2	Well_296-1
																																	2.26431	8795.1	Well_296-1
																																	2.34775	8802.6	Well_296-1
																																	2.34397	8909	Well_Mac1a
																																	2.34942	8916.6	Well_Mac1a
																																	2.32972	8931.8	Well_Mac1a
																																	2.32175	8939.4	Well_Mac1a
																																	2.36326	8984.9	Well_Mac1a
																																	2.375	8984.9	Well_Mac1a
																																	2.32468	8996.4	Well_Mac1a
																																	2.3599	9000.1	Well_Mac1a
																																	2.34145	9004	Well_Mac1a
																																	2.33349	9080	Well_Mac1a
																																	2.35193	9110.4	Well_Mac1a
																																	2.36703	9144.5	Well_Mac1a
																																	2.32132	9152.2	Well_Mac1a
																																	2.32677	9167.4	Well_Mac1a
																																	2.33935	9197.8	Well_Mac1a
																																	2.36157	9209.1	Well_Mac1a
																																	2.34648	9216.8	Well_Mac1a
																																	2.38463	9220.5	Well_Mac1a
																																	2.40141	9228.1	Well_Mac1a
																																	2.37625	9239.5	Well_Mac1a
																																	2.39092	9239.5	Well_Mac1a
																																	2.40937	9254.7	Well_Mac1a
																																	2.42279	9269.8	Well_Mac1a
																																	2.34228	9304.2	Well_Mac1a
																																	2.39344	9319.3	Well_Mac1a
																																	2.41147	9326.9	Well_Mac1a
																																	2.36996	9353.5	Well_Mac1a
																																	2.42153	9383.8	Well_Mac1a
																																	2.38547	9391.5	Well_Mac1a
																																	2.33473	9391.6	Well_Mac1a
																																	2.40224	9399.1	Well_Mac1a
																																	2.41901	9406.7	Well_Mac1a
																																	2.32719	9406.8	Well_Mac1a
																																	2.33222	9422	Well_Mac1a
																																	2.32509	9429.6	Well_Mac1a
																																	2.34186	9429.6	Well_Mac1a
																																	2.35318	9433.4	Well_Mac1a
																																	2.36366	9433.4	Well_Mac1a
																																	2.37876	9437.1	Well_Mac1a
																																	2.35108	9460	Well_Mac1a
																																	2.36115	9463.8	Well_Mac1a
																																	2.39175	9482.7	Well_Mac1a
																																	2.40308	9501.7	Well_Mac1a
																																	2.41356	9516.9	Well_Mac1a
																																	2.38253	9554.9	Well_Mac1a
																																	2.37037	9555	Well_Mac1a
																																	2.35444	9574	Well_Mac1a
																																	2.39469	9585.3	Well_Mac1a
																																	2.40978	9611.9	Well_Mac1a
																																	2.36282	9627.2	Well_Mac1a
																																	2.37456	9649.9	Well_Mac1a
																																	2.34563	9661.4	Well_Mac1a
																																	2.3863	9680.3	Well_Mac1a
																																	2.40055	9684.1	Well_Mac1a
																																	2.42319	9706.9	Well_Mac1a
																																	2.34185	9722.2	Well_Mac1a
																																	2.32466	9729.8	Well_Mac1a
																																	2.33598	9745	Well_Mac1a
																																	2.38965	9760.1	Well_Mac1a
																																	2.3691	9760.2	Well_Mac1a
																																	2.41606	9767.7	Well_Mac1a
																																	2.40474	9794.3	Well_Mac1a
																																	2.34059	9809.6	Well_Mac1a
																																	2.34688	9817.2	Well_Mac1a
																																	2.35107	9840	Well_Mac1a
																																	2.36197	9840	Well_Mac1a
																																	2.38168	9847.5	Well_Mac1a
																																	2.4081	9858.9	Well_Mac1a
																																	2.39552	9866.5	Well_Mac1a
																																	2.41942	9874.1	Well_Mac1a
																																	2.36491	9881.8	Well_Mac1a
																																	2.37287	9938.8	Well_Mac1a
																																	2.42025	9942.5	Well_Mac1a
																																	2.38839	9942.5	Well_Mac1a
																																	2.40138	9972.9	Well_Mac1a
																																	2.42822	10010.9	Well_Mac1a
																																	2.4366	10029.9	Well_Mac1a
																																	2.37706	10037.6	Well_Mac1a
																																	2.36406	10041.4	Well_Mac1a
																																	2.42235	10060.3	Well_Mac1a
																																	2.41102	10064.1	Well_Mac1a
																																	2.3909	10071.7	Well_Mac1a
																																	2.35735	10117.4	Well_Mac1a
																																	2.38377	10125	Well_Mac1a
																																	2.37245	10128.8	Well_Mac1a
																																	2.40306	10140.1	Well_Mac1a
																																	2.41396	10140.1	Well_Mac1a
																																	2.39928	10204.7	Well_Mac1a
																																	2.42653	10219.9	Well_Mac1a
																																	2.41395	10219.9	Well_Mac1a
																																	2.38628	10223.8	Well_Mac1a
																																	2.42234	10280.7	Well_Mac1a
																																	2.39466	10318.7	Well_Mac1a
																																	2.37999	10349.2	Well_Mac1a
																																	2.4085	10352.9	Well_Mac1a
																																	2.43198	10375.7	Well_Mac1a
																																	2.44372	10394.7	Well_Mac1a
																																	2.39005	10406.2	Well_Mac1a
																																	2.42359	10409.9	Well_Mac1a
																																	2.42988	10428.9	Well_Mac1a
																																	2.40221	10493.5	Well_Mac1a
																																	2.41227	10493.5	Well_Mac1a
																																	2.38334	10493.6	Well_Mac1a
																																	2.3674	10535.4	Well_Mac1a
																																	2.37872	10546.8	Well_Mac1a
																																	2.39466	10565.8	Well_Mac1a
																																	2.42443	10588.5	Well_Mac1a
																																	2.43281	10603.7	Well_Mac1a
																																	2.43197	10687.3	Well_Mac1a
																																	2.42065	10694.9	Well_Mac1a
																																	2.40807	10717.7	Well_Mac1a
																																	2.39675	10721.6	Well_Mac1a
																																	2.40304	10774.8	Well_Mac1a
																																	2.41142	10805.1	Well_Mac1a
																																	2.42358	10820.3	Well_Mac1a
																																	2.41897	10869.7	Well_Mac1a
																																	2.40848	10904	Well_Mac1a
																																	2.39968	10904	Well_Mac1a
																																	2.39842	10972.4	Well_Mac1a
																																	2.42232	11017.9	Well_Mac1a
																																	2.39171	11044.6	Well_Mac1a
																																	2.37745	11059.8	Well_Mac1a
																																	2.40806	11071.2	Well_Mac1a
																																	2.398	11082.6	Well_Mac1a
																																	2.42231	11120.5	Well_Mac1a
																																	2.45208	11173.7	Well_Mac1a
																																	2.43237	11181.3	Well_Mac1a
																																	2.4416	11185.1	Well_Mac1a
																																	2.40344	11196.6	Well_Mac1a
																																	2.38499	11211.8	Well_Mac1a
																																	2.4177	11215.6	Well_Mac1a
																																	2.40973	11295.4	Well_Mac1a
																																	2.42482	11310.5	Well_Mac1a
																																	2.39589	11318.2	Well_Mac1a
																																	2.39254	11390.4	Well_Mac1a
																																	2.44327	11413.1	Well_Mac1a
																																	2.4265	11424.6	Well_Mac1a
																																	2.43446	11428.3	Well_Mac1a
																																	2.4592	11432.1	Well_Mac1a
																																	2.40553	11432.2	Well_Mac1a
																																	2.4156	11439.8	Well_Mac1a
																																	2.39547	11443.6	Well_Mac1a
																																	2.38415	11470.2	Well_Mac1a
																																	2.42272	11515.8	Well_Mac1a
																																	2.40008	11538.6	Well_Mac1a
																																	2.43446	11557.5	Well_Mac1a
																																	2.44746	11565.1	Well_Mac1a
																																	2.4114	11576.6	Well_Mac1a
																																	2.44033	11641.1	Well_Mac1a
																																	2.41685	11645	Well_Mac1a
																																	2.46045	11656.3	Well_Mac1a
																																	2.42733	11675.4	Well_Mac1a
																																	2.45165	11686.7	Well_Mac1a
																																	2.40804	11713.4	Well_Mac1a
																																	2.42397	11755.2	Well_Mac1a
																																	2.4332	11759	Well_Mac1a
																																	2.44535	11777.9	Well_Mac1a
																																	2.45542	11823.5	Well_Mac1a
																																	2.4617	11853.9	Well_Mac1a
																																	2.42145	11884.4	Well_Mac1a
																																	2.45751	11895.7	Well_Mac1a
																																	2.4399	11922.4	Well_Mac1a
																																	2.42606	11922.4	Well_Mac1a
																																	2.41894	11926.2	Well_Mac1a
																																	2.40342	11979.4	Well_Mac1a
																																	2.19919	13169.3	Well_Mac1b
																																	2.2122	12743.6	Well_Mac1b
																																	2.21387	13055.2	Well_Mac1b
																																	2.21387	13161.7	Well_Mac1b
																																	2.22267	13066.6	Well_Mac1b
																																	2.22897	12736	Well_Mac1b
																																	2.23609	13047.6	Well_Mac1b
																																	2.23735	13104.6	Well_Mac1b
																																	2.24657	13150.2	Well_Mac1b
																																	2.2537	13066.6	Well_Mac1b
																																	2.25621	13161.6	Well_Mac1b
																																	2.25874	12747.3	Well_Mac1b
																																	2.26334	13062.8	Well_Mac1b
																																	2.26336	12686.5	Well_Mac1b
																																	2.2667	13161.6	Well_Mac1b
																																	2.27425	13009.5	Well_Mac1b
																																	2.27635	12713.1	Well_Mac1b
																																	2.27927	13172.9	Well_Mac1b
																																	2.28389	13020.9	Well_Mac1b
																																	2.28557	13089.3	Well_Mac1b
																																	2.286	12488.9	Well_Mac1b
																																	2.29186	13036.1	Well_Mac1b
																																	2.29187	12686.5	Well_Mac1b
																																	2.29857	12751.1	Well_Mac1b
																																	2.29941	12982.9	Well_Mac1b
																																	2.30569	13020.9	Well_Mac1b
																																	2.30946	13165.3	Well_Mac1b
																																	2.31115	12933.5	Well_Mac1b
																																	2.31198	13085.5	Well_Mac1b
																																	2.3141	12405.2	Well_Mac1b
																																	2.31535	12709.2	Well_Mac1b
																																	2.31744	12941	Well_Mac1b
																																	2.31745	12500.2	Well_Mac1b
																																	2.32457	12705.4	Well_Mac1b
																																	2.33002	12922	Well_Mac1b
																																	2.33297	12405.2	Well_Mac1b
																																	2.33338	12526.8	Well_Mac1b
																																	2.33462	13089.2	Well_Mac1b
																																	2.33757	12735.8	Well_Mac1b
																																	2.34134	12944.8	Well_Mac1b
																																	2.34596	12591.4	Well_Mac1b
																																	2.34931	12675	Well_Mac1b
																																	2.34932	12523	Well_Mac1b
																																	2.34972	13051.2	Well_Mac1b
																																	2.35097	13176.6	Well_Mac1b
																																	2.35769	12906.8	Well_Mac1b
																																	2.35812	12488.7	Well_Mac1b
																																	2.36022	12291.1	Well_Mac1b
																																	2.36022	12389.9	Well_Mac1b
																																	2.36063	12754.8	Well_Mac1b
																																	2.36481	13013.2	Well_Mac1b
																																	2.36776	12572.3	Well_Mac1b
																																	2.36777	12203.7	Well_Mac1b
																																	2.36986	12674.9	Well_Mac1b
																																	2.37111	12838.3	Well_Mac1b
																																	2.37238	12424.1	Well_Mac1b
																																	2.37491	12082.1	Well_Mac1b
																																	2.37949	12883.9	Well_Mac1b
																																	2.37951	12237.9	Well_Mac1b
																																	2.38076	12526.7	Well_Mac1b
																																	2.38117	12750.9	Well_Mac1b
																																	2.38578	12956.1	Well_Mac1b
																																	2.38705	12621.7	Well_Mac1b
																																	2.38748	12325.3	Well_Mac1b
																																	2.38997	13180.3	Well_Mac1b
																																	2.39126	12093.5	Well_Mac1b
																																	2.39167	12424.1	Well_Mac1b
																																	2.39459	12709.1	Well_Mac1b
																																	2.39629	12161.9	Well_Mac1b
																																	2.40005	12515.3	Well_Mac1b
																																	2.40006	12070.6	Well_Mac1b
																																	2.40045	12994.1	Well_Mac1b
																																	2.40045	13077.7	Well_Mac1b
																																	2.40172	12815.5	Well_Mac1b
																																	2.40215	12291	Well_Mac1b
																																	2.40466	12614.1	Well_Mac1b
																																	2.40548	13165.1	Well_Mac1b
																																	2.40551	12184.6	Well_Mac1b
																																	2.40844	12405	Well_Mac1b
																																	2.40885	12709.1	Well_Mac1b
																																	2.41348	12093.4	Well_Mac1b
																																	2.41389	12515.2	Well_Mac1b
																																	2.41555	12906.7	Well_Mac1b
																																	2.41599	12306.2	Well_Mac1b
																																	2.41933	12595	Well_Mac1b
																																	2.41935	12165.6	Well_Mac1b
																																	2.42017	12796.4	Well_Mac1b
																																	2.42099	13165.1	Well_Mac1b
																																	2.42228	12393.6	Well_Mac1b
																																	2.42477	12967.4	Well_Mac1b
																																	2.42522	12093.4	Well_Mac1b
																																	2.43023	12705.2	Well_Mac1b
																																	2.43066	12503.8	Well_Mac1b
																																	2.4319	13104.2	Well_Mac1b
																																	2.43234	12188.4	Well_Mac1b
																																	2.4357	12298.6	Well_Mac1b
																																	2.43696	12066.8	Well_Mac1b
																																	2.43945	12823	Well_Mac1b
																																	2.43988	12621.6	Well_Mac1b
																																	2.4407	13172.6	Well_Mac1b
																																	2.44156	12416.4	Well_Mac1b
																																	2.44199	12173.2	Well_Mac1b
																																	2.4449	12956	Well_Mac1b
																																	2.44616	12853.4	Well_Mac1b
																																	2.44869	12522.8	Well_Mac1b
																																	2.4516	13172.6	Well_Mac1b
																																	2.45163	12287.2	Well_Mac1b
																																	2.45457	12089.5	Well_Mac1b
																																	2.45497	12747	Well_Mac1b
																																	2.45834	12184.5	Well_Mac1b
																																	2.45999	13130.8	Well_Mac1b
																																	2.46127	12420.1	Well_Mac1b
																																	2.46167	12944.6	Well_Mac1b
																																	2.46168	12644.4	Well_Mac1b
																																	2.46254	12089.5	Well_Mac1b
																																	2.46798	12173.1	Well_Mac1b
																																	2.46882	12325.1	Well_Mac1b
																																	2.46963	13165	Well_Mac1b
																																	2.46965	12560.7	Well_Mac1b
																																	2.47048	12788.7	Well_Mac1b
																																	2.47218	12097.1	Well_Mac1b
																																	2.47468	12701.3	Well_Mac1b
																																	2.47509	13016.8	Well_Mac1b
																																	2.47636	12446.7	Well_Mac1b
																																	2.47763	12211.1	Well_Mac1b
																																	2.47972	12351.7	Well_Mac1b
																																	2.48182	12100.9	Well_Mac1b
																																	2.48263	13149.7	Well_Mac1b
																																	2.4839	12629.1	Well_Mac1b
																																	2.48432	12853.3	Well_Mac1b
																																	2.48434	12211.1	Well_Mac1b
																																	2.4881	12473.3	Well_Mac1b
																																	2.49189	12119.9	Well_Mac1b
																																	2.49229	12758.3	Well_Mac1b
																																	2.49356	12359.3	Well_Mac1b
																																	2.49396	13009.1	Well_Mac1b
																																	2.49398	12241.5	Well_Mac1b
																																	2.49521	13218.1	Well_Mac1b
																																	2.49818	12104.7	Well_Mac1b
																																	2.499	12545.5	Well_Mac1b
																																	2.50235	12674.7	Well_Mac1b
																																	2.50278	12420.1	Well_Mac1b
																																	2.50318	12887.5	Well_Mac1b
																																	2.50485	13214.3	Well_Mac1b
																																	2.50697	12287	Well_Mac1b
																																	2.50907	12458.1	Well_Mac1b
																																	2.51031	12796.3	Well_Mac1b
																																	2.512	12568.3	Well_Mac1b
																																	2.51324	13096.5	Well_Mac1b
																																	2.51494	12188.2	Well_Mac1b
																																	2.51786	12963.5	Well_Mac1b
																																	2.52039	12340.2	Well_Mac1b
																																	2.52122	12735.4	Well_Mac1b
																																	2.52162	13210.5	Well_Mac1b
																																	2.52541	12648	Well_Mac1b
																																	2.52543	12112.2	Well_Mac1b
																																	2.52749	13206.7	Well_Mac1b
																																	2.52792	12864.6	Well_Mac1b
																																	2.53171	12480.8	Well_Mac1b
																																	2.53172	12116	Well_Mac1b
																																	2.53379	13073.6	Well_Mac1b
																																	2.53674	12480.8	Well_Mac1b
																																	2.53715	12670.8	Well_Mac1b
																																	2.54049	13187.6	Well_Mac1b
																																	2.54217	12971	Well_Mac1b
																																	2.54512	12750.6	Well_Mac1b
																																	2.54931	12891.2	Well_Mac1b
																																	2.54972	13092.6	Well_Mac1b
																																	2.55141	12480.8	Well_Mac1b
																																	2.55476	12678.4	Well_Mac1b
																																	2.55768	13157.2	Well_Mac1b
																																	2.55769	12803.8	Well_Mac1b
																																	2.56397	13176.2	Well_Mac1b
																																	2.56566	12758.2	Well_Mac1b
																																	2.56691	13016.6	Well_Mac1b
																																	2.57026	13085	Well_Mac1b
																																	2.57321	12845.6	Well_Mac1b
																																	2.57823	13157.2	Well_Mac1b
																																	2.57865	12948.2	Well_Mac1b
																																	2.57992	12784.7	Well_Mac1b

[truncated: 1 more sheets: Porosity_Depth_Estimate]
